1 **RNF43 inhibits WNT5A driven signaling and suppresses melanoma invasion**

2 Tomasz Radaszkiewicz<sup>a</sup>, Michaela Nosková<sup>a</sup>, Kristína Gömöryová<sup>a</sup>, Olga Vondálová  
3 Blanářová<sup>a</sup>, Katarzyna Anna Radaszkiewicz<sup>a</sup>, Markéta Picková<sup>a,b,e</sup>, Ráchel Víchová<sup>b</sup>, Tomáš  
4 Gybel<sup>a</sup>, Karol Kaiser<sup>a</sup>, Lucia Demková<sup>c</sup>, Lucia Kučerová<sup>c</sup>, David Potěšil<sup>d</sup>, Zbyněk Zdráhal<sup>d</sup>, Karel  
5 Souček<sup>a,b,e</sup>, Vítězslav Bryja<sup>a,b\*</sup>

6

7 <sup>a</sup> *Department of Experimental Biology, Faculty of Science, Masaryk University, Kamenice 5,*  
8 *62500, Brno, Czech Republic*

9 <sup>b</sup> *Department of Cytokinetics, Institute of Biophysics CAS, Královopolská 135, 612 65 Brno,*  
10 *Czech Republic*

11 <sup>c</sup> *Laboratory of Molecular Oncology, Cancer Research Institute, Biomedical Research Center of*  
12 *the Slovak Academy of Sciences, Dúbravská cesta 9, 945 05 Bratislava, Slovakia*

13 <sup>d</sup> *Central European Institute of Technology, Masaryk University, Kamenice 5, 62500 Brno,*  
14 *Czech Republic.*

15 <sup>e</sup> *International Clinical Research Center FNUSA-ICRC, Pekařská 53, 656 91 Brno, Czech*  
16 *Republic*

17

18 \* *Corresponding author: [bryja@sci.muni.cz](mailto:bryja@sci.muni.cz)*

19

20 **Abstract**

21 RNF43 is a E3 ubiquitin ligase and known negative regulator of WNT/ $\beta$ -catenin signaling.  
22 We demonstrate that RNF43 is also regulator of noncanonical WNT5A-induced signaling in  
23 human cells. Analysis of the RNF43 interactome using BioID and immunoprecipitation showed  
24 that RNF43 can interact with the core receptor complex components dedicated to the  
25 noncanonical Wnt pathway such as ROR1, ROR2, VANGL1 and VANGL2. RNF43 triggers  
26 VANGL2 ubiquitination and proteasomal degradation and clathrin-dependent internalization of  
27 ROR1 receptor. This activity of RNF43 is physiologically relevant and blocks pro-metastatic  
28 WNT5A signaling in melanoma. RNF43 inhibits responses to WNT5A, which results in the  
29 suppression of invasive properties of melanoma cells. Furthermore, RNF43 prevented WNT5A-  
30 assisted development of resistance to BRAF V600E inhibitor. In line with these findings, *RNF43*  
31 expression decreases during melanoma progression and RNF43-low patients have worse  
32 prognosis. We conclude that RNF43 is a newly discovered negative regulator of WNT5A-  
33 mediated biological responses that desensitizes cells to WNT5A.

34

## 35 Introduction

36 Ubiquitination is a post-translational modification (PTM) based on the addition of  
37 evolutionary conserved protein ubiquitin (Ub) to the lysine residue(s) of the modified protein  
38 (Hershko and Ciechanover, 1998). Ubiquitination controls turnover, activation state, cellular  
39 localization, and interactions of target proteins. Undoubtedly, it is a process, which has a direct  
40 impact on various aspects of cell biology (Rape, 2018). Ubiquitination requires sequential  
41 activation of ubiquitin, its transfer to the carrier protein and subsequent linkage reaction with the  
42 substrate lysine residues. This last step, mediated by the E3 ubiquitin-protein ligases (E3s),  
43 determines target specificity.

44 Ring Finger protein 43 (RNF43) is a E3 ubiquitin ligase with single transmembrane domain  
45 from the PA-TM-RING family. RNF43 and its close homolog Zinc and Ring Finger 3 (ZNF3), act  
46 as negative regulators of the Wnt/ $\beta$ -catenin signaling pathway (Koo *et al.*, 2012; Hao *et al.*, 2012).  
47 Wnt/ $\beta$ -catenin signaling is an evolutionary conserved pathway and a crucial regulator of  
48 embryonal development and tissue homeostasis. RNF43 and ZNF3 control via regulation of  
49 Wnt/ $\beta$ -catenin multiple processes including liver zonation (Planas-Paz *et al.*, 2016), limb  
50 specification (Szenker-Ravi *et al.*, 2018) and mammalian sex determination (Harris *et al.*, 2018).  
51 Mechanistically, RNF43 and ZNF3 ubiquitinate plasma membrane Wnt receptors called  
52 Frizzleds (FZDs) and a co-receptor Low-density Lipoprotein Receptor-related Protein 6 (LRP6),  
53 which results in their internalization and degradation (Hao *et al.*, 2012; Koo *et al.*, 2012).  
54 Therefore, cells become less sensitive or insensitive to Wnt ligands. Activity of RNF43/ZNF3  
55 is regulated by secreted proteins from R-spondin (RSPO) family (Kazanskaya *et al.*, 2004; Kim *et al.*,  
56 2008, 2006, 2005; Nam *et al.*, 2007, 2006; Peng *et al.*, 2013; Xie *et al.*, 2013) that trigger  
57 internalization of RNF43/ZNF3 and function as physiologically relevant activators of Wnt/ $\beta$ -  
58 catenin pathway (Binnerts *et al.*, 2007; Carmon *et al.*, 2011; de Lau *et al.*, 2011; Hao *et al.*, 2016,  
59 2012; Jiang *et al.*, 2015; Koo *et al.*, 2012; Zebisch *et al.*, 2013; Zebisch and Jones, 2015).

60 Because deregulation of Wnt/ $\beta$ -catenin pathway promotes tumor formation (Lim and  
61 Nusse, 2013; van Kappel and Maurice, 2017; Wiese *et al.*, 2018), RNF43/ZNF3 can act as tumor  
62 suppressors. Indeed, mutation or inactivation of *RNF43/ZNF3* lead to the oncogenic activation  
63 of Wnt signaling and associates with colorectal, liver, gastric, endometrial, ovarian and pancreatic  
64 cancers (Bond *et al.*, 2016; Eto *et al.*, 2018; Giannakis *et al.*, 2014; Jiang *et al.*, 2013; Jo *et al.*,  
65 2015; Niu *et al.*, 2015; Planas-Paz *et al.*, 2016; Ryland *et al.*, 2013; Spit *et al.*, 2020; Tsukiyama  
66 *et al.*, 2020).

67           Some members of the Wnt family – such as WNT5A and WNT11 - preferentially activate  
68 downstream signaling that is distinct from Wnt/ $\beta$ -catenin pathway and is referred to as  $\beta$ -catenin-  
69 independent or noncanonical Wnt pathway (Pandur *et al*, 2002; Humphries & Mlodzik, 2018;  
70 VanderVorst *et al*, 2019; Andre *et al*, 2015). Noncanonical Wnt pathway shares some features  
71 with the Wnt/ $\beta$ -catenin pathway – such as requirement for FZD receptors, Dishevelled (DVL)  
72 phosphoprotein and Casein Kinase 1 (CK1) – but clearly differs in others. In mammalian  
73 noncanonical pathway Receptor Tyrosine Kinase Like Orphan Receptor 1 (ROR1) and ROR2 act  
74 as primary (co-)receptors (in contrast to LRP5/6 that have this role in the Wnt/ $\beta$ -catenin pathway)  
75 and four-transmembrane Vang-like protein 1 (VANGL1) and VANGL2 participate on the signal  
76 transduction (Asem *et al.*, 2016; VanderVorst *et al.*, 2019). This signaling axis is also referred to  
77 as Planar Cell Polarity Pathway (PCP) and its activation leads to the changes in the actin  
78 cytoskeleton dynamics, facilitating i.e. polarized cell migration (Andre *et al.*, 2015; Janovská and  
79 Bryja, 2017; Kaucká *et al.*, 2015; Weeraratna *et al.*, 2002).

80           FZD receptors, the best-defined targets of RNF43/ZNRF3, are shared among all Wnt  
81 pathways and their endocytosis and/or degradation have the potential, at least in theory, to  
82 prevent signaling by any Wnt ligands. So far, however, there are is no systematic study  
83 addressing the role of RNF43/ZNRF3 in the noncanonical Wnt signaling in mammals. On the  
84 other side there are several hints that suggest that such possibility is feasible. Secreted inhibitor  
85 of RNF43/ZNRF3 called r-spondin 3 (RSPO3), potentiated noncanonical PCP pathway in  
86 *Xenopus* in a Wnt5a and Dishevelled-dependent manner (Glinka *et al.*, 2011; Ohkawara *et al.*,  
87 2011). In mouse embryos *Znrf3* knockout caused open neural tube defects, which is a common  
88 consequence of the Wnt/PCP signaling disruption (Hao *et al.*, 2012). Other report showed similar  
89 phenotype in *Xenopus* embryos after *Rnf43* mRNA injection (Tsukiyama *et al.*, 2015). And finally,  
90 in *Caenorhabditis elegans*, the homolog of RNF43 and ZNRF3 called plr-1 was shown to control  
91 not only surface localization of frizzled, but also proteins related to mammalian noncanonical Wnt  
92 co-receptors ROR1/2 and RYK (Moffat *et al.*, 2014). However, it is worth to underline that RSPO  
93 family homologs are absent in *C. elegans* (Lebensohn and Rohatgi, 2018), so the mode of action  
94 of RNF43/ZNRF3 in worm might be different than in mammalian cells.

95           In this study, we have directly addressed the role of RNF43 in the WNT5A-induced  
96 signaling. We demonstrate that RNF43 controls noncanonical Wnt pathway similarly to Wnt/ $\beta$ -  
97 catenin pathway. We demonstrate that RNF43 is a relevant inhibitor of pro-metastatic WNT5A  
98 signaling in melanoma where it prevents both WNT5A-induced invasive behavior and WNT5A-  
99 assisted development of resistance to B-RAF inhibitors.

100 **Results**

101 *RNF43 inhibits WNT5A driven noncanonical Wnt signaling pathway*

102 In order to test whether or not RNF43/ZNRF3 controls noncanonical Wnt signaling, we  
103 have decided to study T-REx 293 cells. T-REx 293 cells secrete endogenous WNT5A that  
104 constitutively activates noncanonical Wnt pathway – this can be demonstrated by the  
105 CRISPR/Cas9-mediated knockout of *WNT5A* (Kaiser et al., 2020). Removal of the endogenous  
106 WNT5A in T-REx 293 cells is sufficient to eliminate activation of readouts of WNT5A signaling  
107 such as phosphorylation of ROR1, DVL2 and DVL3 that can be monitored as the decrease in the  
108 phosphorylation-mediated electrophoretic mobility shifts (Fig. 1A). Such autocrine WNT5A  
109 signaling is promoted by the inhibition of endogenous RNF43/ZNRF3 by RSPO1 treatment (Fig.  
110 1B, compare lane 1 and 2) and inhibited by RNF43 overexpression under the tetracycline (Tet)  
111 controlled promoter (TetON) or by block of WNT secretion using porcupine inhibitor Wnt-C59 (Fig.  
112 1B). To confirm that the effects are indeed caused by block of WNT5A signaling, T-REx 293 cells  
113 pre-treated with Wnt-C59 and as such unable to produce Wnt ligands, were stimulated with the  
114 increasing doses of recombinant WNT5A. As shown in Fig. 1C, overexpression of RNF43  
115 completely blocked signaling induced by recombinant WNT5A. Altogether, this demonstrates that  
116 RNF43 has the potential to block WNT5A signaling in mammalian cells.

117 *RNF43 physically interacts with key proteins from noncanonical WNT pathway*

118 To address the molecular mechanism of RNF43 action in the noncanonical Wnt pathway  
119 we decided to describe RNF43 interactome by the proximity-dependent biotin identification  
120 (BioID) (Roux et al., 2012), which was already successfully applied in the challenging identification  
121 of E3s substrates (Coyaud et al., 2015; Deshar et al., 2016). We have exploited our recently  
122 published dataset (Spit et al., 2020) based on T-REx 293 TetON cells that inducibly expressed  
123 RNF43 fused C-terminally (intracellularly) with BirA\* biotin ligase. Several core proteins of the  
124 noncanonical Wnt signaling pathway – namely ROR1, ROR2, VANGL1, VANGL2, SEC24B and  
125 all three isoforms of DVL – were strongly and specifically biotinylated by RNF43-BirA\* (Fig. 1D  
126 and Figure 1 Supplementary table 1). Furthermore, noncanonical Wnt pathway was significantly  
127 enriched also in the gene ontology (GO) terms (Figure 1 Supplementary table 2). Altogether, it  
128 suggests that RNF43 can at least transiently interact with multiple proteins involved in the  
129 Wnt/Planar Cell Polarity pathway, including essential receptor complex components from the  
130 ROR, DVL and VANGL protein families.

131 To validate the protein-protein interactions identified by BioID, we performed a series of  
132 co-immunoprecipitation (co-IP) and co-localization experiments (Fig. 2 and Figure 2 figure  
133 supplement 1). We have focused on the interactions of RNF43 with ROR1/ROR2 and with  
134 VANGL1/VANGL2 mainly because these interactions are novel and at the same time highly  
135 relevant for the noncanonical Wnt pathway. RNF43 co-immunoprecipitated with both VANGL2  
136 (Fig. 2A) and VANGL1 (Figure 2 figure supplement 1A). More detailed analysis of VANGL2  
137 showed co-localization of VANGL2 and RNF43 in the cell membrane (Fig. 2B, B'). RNF43 also  
138 efficiently pulled down ROR1 (Fig. 2C) and ROR2 (Figure 2 figure supplement 1B). Deletion of  
139 the cysteine rich domain (CRD) (ROR2, Figure 2 figure supplement 1B) had no impact on the  
140 amount of co-immunoprecipitated RNF43, which suggests that RNF43 primarily interacts with  
141 RORs intracellularly. Both ROR1/ROR2 co-localized with RNF43 at the level of plasma  
142 membrane (Fig. 2D, D' and Figure 2 figure supplement 1C, C'). It was described that RORs and  
143 VANGLs also bind DVL (Gao et al., 2011; Mentink et al., 2018; Seo et al., 2017; Witte et al., 2010;  
144 Yang et al., 2017) and at the same time DVL proteins mediate ubiquitination of FZD receptors by  
145 RNF43 in the Wnt/ $\beta$ -catenin pathway (Jiang et al., 2015). To address whether DVL also acts as  
146 a physical link between RNF43 and the analyzed PCP proteins we performed the co-IP  
147 experiments with VANGL2 and ROR1 in the T-REx 293 cells lacking all free DVL isoforms (DVL  
148 triple knockout cells) (Paclíková et al., 2017). As shown in Figure 2 figure supplement 1D and E,  
149 RNF43 was able to bind both VANGL2 and ROR1 as efficiently as in the wild type cells (compare  
150 with Fig. 2A, D). In summary, our results indicate that RNF43 interacts, in a DVL-independent  
151 way, with PCP proteins from VANGL and ROR families.

#### 152 *RNF43 ubiquitinates VANGL2 and triggers its degradation*

153 Since RNF43 is an E3 ubiquitin ligase we next tested whether it can ubiquitinate its binding  
154 partners from the noncanonical Wnt pathway. Enzymatically inactive RNF43 Mut1 variant (Koo et  
155 al., 2012), served here as a negative control. Using His-ubiquitin pulldown assay, we were able  
156 to show that VANGL2 (Fig. 3A), as well as DVL1 and DVL2 (Figure 3 figure supplement 1A) were  
157 ubiquitinated when co-expressed with RNF43 but not with RNF43 Mut1. However, we were  
158 unable to detect RNF43-induced ubiquitination of ROR1 or ROR2 (negative data, not shown).

159 Further analysis showed that overexpression of RNF43, but not its E3 ligase dead variant,  
160 decreased VANGL2 protein level (Fig. 3B, quantified in Figure 3 figure supplement 1B). Decrease  
161 in VANGL2 caused by RNF43 was accompanied by impeded phosphorylation of ROR1 (Fig. 3B)  
162 and DVL3 (Fig. 3B, Figure 3 figure supplement 1B). On the other side, two independent clones of

163 cells deficient in both RNF43 and ZNRF3 (*RNF43/ZNRF3* dKO; *R/Z* dKO) showed higher  
164 VANGL2 levels and higher DVL phosphorylation (Fig. 3B, Figure 3 figure supplement 1B).  
165 Interestingly, treatment with proteasome inhibitor MG132 but not with autophagosome-lysosome  
166 inhibitor Chloroquine blocked these effects of RNF43 (Fig. 3C). This suggests that RNF43 action  
167 in noncanonical Wnt pathway depends on the proteasomal degradation pathway, which differs  
168 from the Wnt/ $\beta$ -catenin pathway, where RNF43 triggers FZD degradation via lysosomal pathway  
169 (Koo et al., 2012).

#### 170 *RNF43 induces ROR1 endocytosis by a clathrin dependent pathway*

171 ROR1 and ROR2 are the key receptors for WNT5A that we found to interact with RNF43  
172 (Figs. 1 and 2). We thus speculated that RNF43 can regulate ROR1/ROR2 surface levels. T-Rex  
173 cells express dominantly ROR1 and indeed flow cytometric analysis demonstrated that cell  
174 lacking endogenous RNF43 and ZNRF3 have more ROR1 receptor on the surface than parental  
175 T-REx cells (Fig. 3D). The staining is specific as demonstrated by the validation of the ROR1-  
176 APC antibody in *ROR1* KO T-REx 293 cells (Figure 3 figure supplement 1C and D). When we  
177 introduced inducible RNF43 into *RNF43/ZNRF3* dKO T-REx cell line, we were able to rescue this  
178 phenotype and after three hours of tetracycline treatment we detected decreased surface ROR1  
179 (Fig. 3E, E'). The overnight exposition to tetracycline had no significant effect (Fig. 3E, E'). Similar  
180 trends were observed for wild type T-REx 293 RNF43 TetON cells (Figure 3 figure supplement  
181 1E, E').

182 In our analysis of RNF43 interactors (Fig. 1D), we identified also multiple proteins involved  
183 in the endosomal transport. It included proteins involved in the clathrin endocytic pathway -  
184 STAM1, HRS, ZFYVE16, PICALM, NUMB, RAB11-FIP2 and subunits of the associated adaptor  
185 protein complexes AP-3 and AP-4 (Figure 1 Supplementary table 1) (Bache et al., 2003; Cullis et  
186 al., 2002; Hirst et al., 2013; Raiborg et al., 2001; Santolini et al., 2000; Seet and Hong, 2005;  
187 Tebar et al., 1999). Based on the BioID results analysis, we thus speculated that RNF43 may  
188 promote clathrin-mediated endocytosis of ROR1. Thus, we applied dansylcadaverine to block this  
189 pathway (Blitzer and Nusse, 2006). In agreement with our hypothesis, treatment with this inhibitor  
190 prevented RNF43-mediated effect on the ROR1 surface expression in both cell lines (Fig. 3F,  
191 Figure 3 figure supplement 1F).

192 To get a better insight into the mechanism of RNF43-induced internalization of ROR1, we  
193 analyzed the colocalization of ROR1 and RAB5 (marker of early endosomes) and RAB11 (marker  
194 of recycling endosomes) in T-REx 293 *R/Z* dKO RNF43 TetON (Fig. 3G and Figure 3 figure  
195 supplement 2) and T-REx 293 RNF43 TetON cells (Figure 3 figure supplement 1G and Figure 3

196 figure supplement 2). Hyperactivation of Rab5 by overexpression of wild-type Rab5 leads to the  
197 formation giant early endosomes (Bucci et al., 1992) where we observed ROR1/RAB5 co-  
198 localization after three hours of tetracycline treatment. The co-localization decreased after  
199 overnight exposition to tetracycline. RAB11<sup>+</sup> endosomes were recruited to the ROR1 as well after  
200 RNF43 induction and RAB11 co-localized strongly with ROR1 even after ON treatment. We  
201 conclude that surface ROR1 is controlled by RNF43 via interference with RAB5 and RAB11  
202 mediated endocytosis and vesicle recycling.

### 203 *RNF43 expression is decreased in human melanoma*

204 Our data shown in Figs. 1-3 demonstrate that RNF43 can inhibit WNT5A-induced  
205 noncanonical signaling via downregulation of the receptor complexes. But is RNF43 capable to  
206 block WNT5A-induced biological processes? WNT5A signaling plays crucial role in melanoma,  
207 one of the most malignant tumor types. High expression of *WNT5A* in this cancer is a negative  
208 overall survival and positive metastasis formation factor (Da Forno et al., 2008; Luo et al., 2020;  
209 Weeraratna et al., 2002). Signaling cascade activated by WNT5A in melanoma drives epithelial-  
210 mesenchymal transition (EMT), resulting in the increased metastatic properties of melanoma cells  
211 *in vitro* and *in vivo* (Dissanayake et al., 2008, 2007; Sadeghi et al., 2018). In melanoma WNT5A  
212 acts through FZD and ROR1/ROR2 (O'Connell et al., 2010; Tiwary and Xu, 2016; Weeraratna et  
213 al., 2002). Importance of WNT5A driven signaling in melanoma is thus well recognized and  
214 melanoma represents probably the most characterized (and most clinically relevant)  
215 pathophysiological condition where noncanonical WNT5A signaling drives cell invasion and  
216 disease progression (Arozarena and Wellbrock, 2017a; Da Forno et al., 2008; Dissanayake et al.,  
217 2007; Lai et al., 2012; Liu et al., 2018; O'Connell et al., 2010, 2008; Weeraratna et al., 2002).

218 Interestingly, the *in silico* analysis of gene expression in melanoma (Talantov et al., 2005;  
219 Xu et al., 2008) showed that *RNF43* expression dramatically decreases between benign  
220 melanocytic skin nevus and cutaneous melanoma (Fig. 4A) (Talantov et al., 2005) and further  
221 between primary site and metastasis (Xu et al., 2008) (Fig. 4B). Importantly, analysis of other  
222 datasets (Anaya, 2016) showed that *RNF43* low melanoma patients have shorter overall survival  
223 (OS) (Fig. 4C). *ZNRF3* expression had no prognostic value (Figure 4 figure supplement 1D).  
224 Interestingly, expression of two genes encoding direct targets ubiquitinated by RNF43, namely  
225 *DVL3* and *VANGL1*, increased during melanoma progression (Figure 4 figure supplement 1A, C)  
226 and high expression in both cases correlates with bad prognosis and shorter overall survival (Fig.  
227 4D, Figure 4 figure supplement 1 B). All these findings are in line with the hypothesis that RNF43



228 acts in melanoma as a tumor suppressor that restricts WNT5A-induced biological processes and  
229 gets silenced during melanoma progression.

230 *RNF43 inhibits invasive properties of melanoma cells in vitro*

231 A375 is a human melanoma cell line that is broadly used to study WNT5A role in  
232 melanoma (Anastas et al., 2014; Connacher et al., 2017; Da Forno et al., 2008; Ekström et al.,  
233 2014; Linnskog et al., 2016; Liu et al., 2018). For the purpose of our studies, we chose A375 wild  
234 type (WT) cells and their derivative with the increased metastatic potential referred to as A375 IV  
235 (Kucerova et al., 2014). Both A375 variants express *RNF43*, *WNT5A* (Figure 4 figure supplement  
236 2A), and secrete WNT5A to the culture medium (Fig. 4E). Interestingly, *RNF43* expression in the  
237 A375 IV cells was significantly lower than in the A375 WT parental cells (Figure 4 figure  
238 supplement 2B). Expression of *ZNRF3* did not differ and it was not affected by *RNF43*  
239 overexpression (Figure 4 figure supplement 2C). In order to study the *RNF43* function, we  
240 generated A375 cells lacking *RNF43/ZNRF3* by CRISPR/Cas9 method (sequencing results are  
241 present in the Supplementary Table 1) and cells stably overexpressing *RNF43* (Fig. 4F). The  
242 initial characterization of A375 derivatives essentially confirmed the findings from T-REx 293 (see  
243 Fig. 1) where *RNF43* loss- and gain-of-function correlated strongly with the level of Wnt pathway  
244 activation assessed as DVL phosphorylation (Fig. 4G, quantified in Figure 4 figure supplement  
245 1E, F). Total protein levels of DVL2, DVL3 as well as their expression remained unaffected by the  
246 manipulation of *RNF43* expression (Figure 4 figure supplement 2D-G). Similarly to T-REx 293  
247 cells, also in A375 WT (Fig. 4H) and A375 IV (Fig. 4I) melanoma cells *RNF43* overexpression  
248 efficiently blocked WNT5A-induced signaling.

249 WNT5A signaling has been related to the numerous biological features that support  
250 invasive properties of melanoma (Arozarena and Wellbrock, 2017a; O'Connell and Weeraratna,  
251 2009; Prasad et al., 2015; Weeraratna et al., 2002). To address if *RNF43* affects any of these  
252 WNT5A-controlled properties, we have compared parental and *RNF43*-derivatives of A375 cells  
253 in the panel of functional assays that included: (i) wound healing assay, (ii) matrigel invasion  
254 assay, (iii) invadopodia formation assay and (iv) gelatin degradation assay. Firstly, cells  
255 overexpressing *RNF43* showed suppressed 2D collective migration in the wound healing assay  
256 (Fig. 5A). Similarly, invasion of individual cells through the extracellular matrix (ECM) mimicking  
257 Matrigel was reduced by *RNF43* (Fig. 5B). The analysis of invadopodia - specialized structures  
258 mediating adhesion and remodeling of surrounding ECM (Eddy et al., 2017; Masi et al., 2020),  
259 showed that cells overexpressing *RNF43* formed less of them (Fig. 5C). In agreement, we also

260 observed that these structures displayed reduced gelatin degradation activity in A375 WT and  
261 A375 IV cells overexpressing RNF43 (Fig. 5D). Further, treatment with WNT5A enhanced gelatin  
262 degradation capacity of A375 WT cells, but not their RNF43 overexpressing derivate (Fig. 5D).  
263 Representative images from conducted assays are shown in Figure 5 figure supplement 1-4. All  
264 these assays strongly support the conclusion that RNF43 acts as the strong molecular inhibitor  
265 of WNT5A-triggered pro-invasive features of melanoma.

#### 266 *RNF43 prevents acquisition of resistance to BRAF V600E targeted therapy*

267 The Mitogen activated protein kinase (MAPK) pathway is hyperactivated in melanoma  
268 (Davies et al., 2002) as a result of UV-induced mutations triggering constitutive activation of this  
269 signaling axis. The most common genetic aberration - *BRAF V600E* is a target of anti-melanoma  
270 therapy (Akbari et al., 2015; Birkeland et al., 2018; Chapman et al., 2011; Flaherty et al., 2010;  
271 Hodis et al., 2012; Shain et al., 2015). Drugs targeting mutated BRAF (e.g.  
272 Vemurafenib/PLX4032) in melanoma improved patient's survival (Chapman et al., 2011; Flaherty  
273 et al., 2010; Joseph et al., 2010). Unfortunately, patients receiving BRAF inhibitors (BRAFi)  
274 relapses after several months of monotherapy because of the acquired resistance (Nazarian et  
275 al., 2010). WNT5A was shown to play a crucial role in the process leading to the Vemurafenib  
276 resistance (Anastas et al., 2014; Mohapatra et al., 2018; O'Connell et al., 2013; Prasad et al.,  
277 2015; Webster et al., 2015). Therefore, we were interested to check whether RNF43 inhibits via  
278 its effects on WNT5A signaling cellular plasticity in response to Vemurafenib (PLX4032), a  
279 clinically used *BRAF V600E* inhibitor.

280 The process of Vemurafenib resistance acquisition can be modelled in vitro. We applied  
281 experimental scheme optimized for A375 (Anastas et al., 2014). This model (Fig. 6A) allows to  
282 study both acute responses to Vemurafenib (24 h treatment) as well as the gradual adaptation  
283 the long-term cell culture in the increasing vemurafenib doses. Vemurafenib resistant (VR) cells  
284 can be obtained after approximately 2 months. As shown in Fig. 6B, treatment with Vemurafenib  
285 resulted in rapid and complete inhibition of ERK1/2 phosphorylation, the readout of MAPK  
286 activation (compare lane 1 and 2). In contrast A375 WT VR cells showed constitutive ERK1/2  
287 phosphorylation even in the presence of 2  $\mu$ M Vemurafenib (compare lane 2 and 3). Interestingly,  
288 transient exposition to Vemurafenib resulted in the impeded phosphorylation of ROR1, DVL2 and  
289 DVL3 (Fig. 6B, C, D). On the other side, VR cells displayed elevated ROR1 levels and increased  
290 phosphorylation of DVL2 and DVL3 (Fig. 6B, C and D). This suggests that activation of the

291 noncanonical WNT5A-induced signaling is indeed a part of the melanoma adaptation to  
292 Vemurafenib.

293 Therefore, we challenged with Vemurafenib A375 WT and its RNF43 expressing  
294 derivatives. As shown in Fig. 6E exogenous RNF43 decreased colony formation and proliferation  
295 of cells seeded in the low density and Vemurafenib further enhanced this effect. Importantly, both  
296 A375 WT and A375 IV overexpressing RNF43 completely failed to develop resistance to  
297 Vemurafenib and died off during the selection at 1  $\mu$ M Vemurafenib concentration (Fig. 6F).  
298 Altogether these data confirm earlier findings on the importance of WNT5A signaling in the  
299 acquisition of Vemurafenib resistance and demonstrate that RNF43 can completely block this  
300 process.

301

## 302 Discussion

303 Our study identified RNF43 as the inhibitor of noncanonical WNT5A-induced signaling.  
304 RNF43 physically interacted with multiple receptor components of the Wnt/PCP pathway such as  
305 ROR1/2, VANGL1/2 or DVL1/2/3 and triggered degradation of VANGL2 and membrane clearance  
306 of ROR1; ultimately resulting in the reduced cell sensitivity to WNT5A. The newly discovered  
307 RNF43 action in WNT5A-mediated signaling seems to be mechanistically different than the well-  
308 known function in the Wnt/ $\beta$ -catenin pathway. For example, we observed ROR1 and VANGL2  
309 interaction with RNF43 in the absence of DVL. In contrast, DVL seems to be essential for the  
310 activity of RNF43 in the Wnt/ $\beta$ -catenin pathway (Jiang et al., 2015). Further, inhibitory action of  
311 RNF43 in WNT5A-signaling could not be blocked by inhibition lysosomal pathway, in contrast to  
312 the earlier observations in WNT/ $\beta$ -catenin pathway (Koo et al., 2012). On the other side, WNT5A  
313 signaling can be similarly to Wnt/ $\beta$ -catenin promoted by RNF43 inhibitors from R-SPO family.  
314 Also, in line with the earlier findings that RNF43 leads to the packing of ubiquitinated FZD to the  
315 RAB5<sup>+</sup> endosomes (Koo et al., 2012), ROR1 is as well internalized via clathrin-dependent  
316 mechanism into RAB5<sup>+</sup> endosomes. It remains to be studied how RNF43 in a coordinated manner  
317 controls both WNT/ $\beta$ -catenin and noncanonical WNT pathways.

318 We demonstrate that the newly characterized RNF43-WNT5A regulatory module controls  
319 WNT5A signaling and biology in melanoma. WNT5A-induced signaling plays in melanoma a  
320 crucial role. Up to date, 5-year survival of metastatic melanoma patients rate between 5-19%,  
321 depending by the location and the number of metastases (Sandru et al., 2014). Elevated  
322 expression of *WNT5A*, associates with negative overall survival in melanoma (Da Forno et al.,  
323 2008; Luo et al., 2020; Weeraratna et al., 2002) - we have observed inverse correlation for *RNF43*,  
324 which was a positive prognostic factor in melanoma and got silenced as melanoma progressed.  
325 WNT5A promotes multiple pro-invasive features of melanoma cells such as EMT, invasion,  
326 metastasis, cell proliferation and extracellular matrix remodeling by melanoma cells (Dissanayake  
327 et al., 2008, 2007; Fernández et al., 2016; Lai et al., 2012). RNF43 overexpression efficiently  
328 suppressed all tested pro-metastatic properties of melanoma cells associated with WNT5A.  
329 Among those, the clinically most relevant is the acquisition of resistance to BRAF inhibitor  
330 Vemurafenib.

331 *BRAF V600E* mutation appears in up to 50% of melanoma cases results in the oncogenic  
332 activation of MAPK pathway (Akbari et al., 2015; Wan et al., 2004). Vemurafenib (PLX4032), a  
333 compound selectively inhibiting BRAF V600E, showed positive clinical effects in melanoma  
334 (Bollag et al., 2012; Joseph et al., 2010). Unfortunately, most of the patients develop resistance

335 to Vemurafenib treatment and progress (Chapman et al., 2011). Multiple mechanisms underlying  
336 acquisition of resistance were described (Arozarena and Wellbrock, 2019, 2017b; Johnson et al.,  
337 2015; Luebker and Koepsell, 2019; Schmitt et al., 2019; Su et al., 2020, 2017; Talebi et al., 2018;  
338 Tirosh et al., 2016). Among those mechanisms, WNT5A signaling has a prominent role - *WNT5A*  
339 expression was shown to positively correlate with Vemurafenib resistance (Anastas et al., 2014;  
340 Prasad et al., 2015; Webster et al., 2015) and WNT5A treatment decreased melanoma cells  
341 response to the Vemurafenib (Anastas et al., 2014; O'Connell et al., 2013). Our finding that  
342 RNF43-controlled regulatory axis could completely block development of resistance to BRAF  
343 inhibition further highlights importance of WNT5A signaling in this process and also uncovers a  
344 mechanism that can be explored therapeutically.

345 Relevance of our findings is likely not limited to melanoma. Signaling cascade RSPO–  
346 LGR4/5–RNF43/ZNRF3 has been shown to regulate variety of biological processes. In light of  
347 our results, it is tempting to speculate that WNT5A-RNF43 axis regulates other developmental,  
348 physiological and patho-physiological conditions. For example, *WNT5A* is overexpressed in  
349 gastric cancer where it positively correlates with the presence of the lymph node metastasis,  
350 tumor depth, EMT induction and poor prognosis (Astudillo, 2020; Hanaki et al., 2012; Kanzawa  
351 et al., 2013; Kurayoshi et al., 2006; Nam et al., 2017; Saitoh et al., 2002). Notably, reduced RNF43  
352 function is a negative prognosis factor in gastric cancer patients (Gao et al., 2017; Neumeyer et  
353 al., 2019a; Niu et al., 2015) and RNF43 loss of function type of mutation exacerbated *Helicobacter*  
354 *pylori*-induced gastric tumor carcinogenesis associated with the upregulation of *WNT5A* mRNA  
355 level (Kato, 2007; Li et al., 2014; Neumeyer et al., 2019b; Peek and Crabtree, 2006). Further, in  
356 colorectal cancer RNF43 mutations were found to associate with *BRAF* V600E mutation  
357 (Matsumoto et al., 2020; Yan et al., 2017). These results suggest the existence of more universal  
358 functional WNT5A-RNF43 axis where RNF43 acts as a gatekeeper guarding the abnormal pro-  
359 cancerogenic noncanonical Wnt pathway activation.

360 Further exciting avenues relate to the importance of RSPO-RNF43/ZNRF3 module in the  
361 regulation of multiple developmental processes dependent on WNT5A. There are literature hints  
362 that suggest that indeed WNT5A-signaling is fine-tuned by RNF43/ZNRF3 during convergent  
363 extension movements. The regulation of *Rspo3* has been proven in *Xenopus* embryogenesis,  
364 where it regulates gastrulation movements and head cartilage morphogenesis in a manner  
365 involving *Wnt5a* and *Syndecan-4* binding by R-spondin. Strikingly, *Rspo3* antisense morpholino  
366 caused phenotype characteristic for the noncanonical Wnt signalling pathway - *spina bifida*  
367 (Ohkawara et al., 2011). Similarly, overexpression of *Znrf3* in zebrafish embryo caused shortened

368 body axis and abnormal shape of somites, phenotypes also recognised as typical for Wnt/PCP  
369 pathway perturbances (Hao et al., 2012). And, finally in mammals, a fraction of *Znrf3* KO mice  
370 showed an open neural tube phenotype (Hao et al., 2012), again reminiscent of defective  
371 Wnt/PCP signalling. Altogether, these observations together with our data suggest that RSPO-  
372 RNF43/ZNRF3 signaling represents an evolutionary conserved and widely used mechanism used  
373 to control activation of noncanonical WNT signaling.

374

## 375 **Materials and Methods**

### 376 *1. Cell lines and treatments*

377 T-REx™-293 (R71007, Thermo Fisher Scientific), GFP labelled human melanoma A375  
378 wild type (WT) and its metastatic derivate A375 IV cell lines (Kucerova et al., 2014) were  
379 propagated in the Dulbecco's modified Eagle's medium (DMEM, 41966–029, Gibco, Life  
380 Technologies) supplemented with the 10% fetal bovine serum (FBS, 10270–106, Gibco, Life  
381 Technologies), 2 mM L-glutamine (25030024, Life Technologies), 1% penicillin-streptomycin (XC-  
382 A4122/100, Biosera) under 5% (vol/vol) CO<sub>2</sub> controlled atmosphere at 37 °C.. For inhibition of  
383 endogenous the Wnt ligands, cells were treated with the 0.5 μM Porcupine inhibitors C-59  
384 (ab142216, Abcam) or LGK-974 (1241454, PeproTech). For canonical Wnt signaling activation  
385 recombinant the human WNT3A (CF 5036-WN-CF, RnD Systems) was used and the recombinant  
386 human WNT5A (645-WN-010, RnD Systems) for noncanonical Wnt pathway stimulation, both in  
387 40 ng/ml, 60 ng/ml or 80 ng/ml concentrations for 3h or overnight treatments. Co-treatment with  
388 the recombinant human R-Spondin-1 (120-38, PeproTech) in 50 ng/ml dose was applied where  
389 indicated. Dansylcadaverine (D4008, Sigma-Aldrich) 50 μM treatment along with 3 h tetracycline  
390 was applied to block clathrin dependent endocytosis pathway (Blitzer and Nusse, 2006).

391 For preparation of stable cell lines, antibiotic selection after plasmid DNA transfection was  
392 performed using 5 μg/ml blasticidin S (3513-03-9, Santa Cruz Biotechnology) or 200 μg/ml of  
393 hygromycin B (31282-04-9, Santa Cruz Biotechnology) for T-REx-293 cells and accordingly 400  
394 μg/ml and 5 μg/ml in case of A375 melanoma cell line. As a result, tetracycline inducible T-REx-  
395 293 RNF43 and RNF43 Mut1 TetON, T-REx-293 *RNF43/ZNRF3* dKO RNF43 TetON, A375 WT  
396 +RNF43 and A375 IV +RNF43 were obtained. T-REx-293 *DVL1/2/3* tKO cells were described  
397 previously (Paclíková et al., 2017). For transgene expression induction (TetON), T-REx-293 cells  
398 were treated with the 1 μg/ml of tetracycline (60-54-8, Santa Cruz Biotechnology) for indicated

399 time (3 hours to overnight). Lysosomal degradation pathway was blocked by the 10  $\mu$ M  
400 Chloroquine (C662, Sigma) treatment, whereas 10  $\mu$ M MG-132 (C2211, Sigma) was used for the  
401 proteasome inhibition. Generation of the melanoma cells resistant to Vemurafenib (HY-12057,  
402 MedChem Express) was performed according to the published protocols, i.e. (Anastas et al.,  
403 2014). Resistant cells were cultured in the presence of 2  $\mu$ M vemurafenib. For transient  
404 treatments (24h or 48 h) of melanoma cell lines, 0.5  $\mu$ M vemurafenib has been used.

405

## 406 *2. Plasmids/cloning*

407 Backbone of the plasmid pcDNA4-TO-RNF43-2xHA-2xFLAG (kindly gifted by Bon-  
408 Kyoung Koo together with pcDNA4-TO-RNF43Mut1-2xHA-2xFLAG (Koo et al., 2012)) was used  
409 for further cloning. Briefly, for generation of the BioID inducible pcDNA4-TO-RNF43-BirA\*-HA  
410 plasmid, cDNA encoding RNF43 without stop codon was amplified by the PCR and cloned into  
411 the pcDNA3.1 MCS-BirA(R118G)-HA (Addgene plasmid #36047) using HpaI (ER1031, Thermo  
412 Fisher Scientific) and EcoRI (ER0271, Thermo Fisher Scientific) restriction enzymes to fuse it in  
413 frame with the BirA\*-HA sequence. Then, RNF43-BirA\*-HA cDNA was amplified and cloned by  
414 the In-Fusion cloning method (639690, Takara Bio) into linearized by HindIII (ER0501, Thermo  
415 Fisher Scientific) and XbaI (ER0681, Thermo Fisher Scientific) pcDNA4-TO plasmid. To eliminate  
416 BirA\* enzyme mediated potential false positive results, pcDNA3-RNF43-HA was prepared by  
417 subcloning RNF43 PCR product containing HA encoding sequence in reverse primer to the  
418 pcDNA3 backbone (Invitrogen). All obtained plasmids were verified by the Sanger sequencing  
419 method.

420 Other plasmids used were described previously and included: myc-Vangl1, GFP-Vangl2,  
421 GFP-Vangl2 $\Delta$ N, GFP-Vangl2 $\Delta$ C, GFP-Vangl2 $\Delta$ N $\Delta$ C (Belotti et al., 2012), pEGFP-C1-Rab5a  
422 (Chen et al., 2009), GFP-rab11 WT (Addgene #12674), His-Ubiquitin (Tauriello et al., 2010),  
423 pcDNA3-Flag-mDvl1 (Tauriello et al., 2010), pCMV5-3xFlag Dvl2 (Addgene #24802), pcDNA3.1-  
424 Flag-hDvl3 (Angers et al., 2006), pcDNA3.1-hROR1-V5-His (gifted by Kateřina Tmějová),  
425 pcDNA3-Ror2-Flag and pcDNA3-Ror2-dCRD-FLAG (Sammar et al., 2004),  
426 pRRL2\_ROR1 $\Delta$ CYTO and pRRL2\_ROR1 $\Delta$ Tail (Gentile et al., 2011), hCas9 (Addgene #41815),  
427 gRNA\_GFP-T1 (Addgene #41819), PiggyBack-Hygro and Transposase coding plasmids (gifted  
428 by Bon-Kyoung Koo). Sequences of primers used for cloning is present in the Table 1.

429 **Table 1 – Cloning and mutagenesis primers**

| Primer                 | Sequence                                                                     | Purpose                                             |
|------------------------|------------------------------------------------------------------------------|-----------------------------------------------------|
| RNF43 BirA*F           | <i>ATGCAGTTAACATGAGTGGTGGCCACCAGCTG</i>                                      | RNF43 cDNA cloning into pcDNA3.1 MCS-BirA(R118G)-HA |
| RNF43 BirA*R           | <i>ATGCAGAATTCCACAGCCTGTTACACAGCTCCT</i>                                     |                                                     |
| RNF43 InFusion F       | <i>GTTTAAACTTAAGCTTATGAGTGGTGGCCACCAG</i>                                    | RNF43-BirA(R118G)-HA into pcDNA4                    |
| RNF43 InFusion R       | <i>AAACGGGCCCTCTAGACTATGCGTAATCCGGTACA</i>                                   |                                                     |
| RNF43-HA F             | <i>TTAAAGCTTATGAGTGGTGGCCACCAG</i>                                           | RNF43-HA cloning into pcDNA3                        |
| RNF43-HA R             | <i>ATCGATATCTCAAGCGTAATCTGGAACATCGTATGGGTACACAGCCT</i><br><i>GTTACACAGCT</i> |                                                     |
| pCW57-RNF43 InFusion F | <i>ATTGGCTAGCGAATTATGAGTGGTGGCCACCAGC</i>                                    | pCW57-RNF43 generation                              |
| pCW57-RNF43 InFusion R | <i>CGGTGTCGACGAATTTTCAGGCGTAGTCGGGCACG</i>                                   |                                                     |

430

431 **3. CRISPR/Cas9**

432 For targeting *RNF43* and *ZNRF3* in the T-Rex-293, gRNAs:  
433 *TGAGTTCCATCGTAACTGTGTGG* (PAM) and *AGACCCGCTCAAGAGGCCGGTGG* were  
434 cloned into gRNA\_GFP-T1 backbone and transfected together with PiggyBack-Hygro and  
435 Transposase coding plasmids using polyethylenimine (PEI) in a way described below. For *ROR1*  
436 and *WNT5A* knock-out cell lines generation, gRNA *CCATCTATGGCTCTCGGCTGCCGG* (*ROR1*)  
437 and *AGTATCAATTCCGACATCGAAGG* (*WNT5A*) were used. Transfected cells were  
438 hygromycin B selected and seeded as single cells. Genomic DNA isolation was performed using  
439 DirectPCR Lysis Reagent (Cell) (Viagen Biotech), Proteinase K (EO0491, Thermo Fisher  
440 Scientific) and DreamTaq DNA Polymerase (EP0701, Thermo Fisher Scientific) according to the  
441 manufacturers. PCR products were analyzed by restriction digestion using Taal (ER1361, Thermo  
442 Fisher Scientific) in case of *RNF43*, HpaII (ER0511, Thermo Fisher Scientific) – *ZNRF3*, TaqI  
443 (ER0671, Thermo Fisher Scientific) - *WNT5A* and TseI (R0591S, New England BioLabs) - *ROR1*  
444 for detection of Cas9 mediated disruptions in the recognition sites.



445 For targeting *RNF43/ZNRF3* in the A375 and in the A375 IV melanoma lines, gRNAs:  
446 *AGTTACGATGGAACTCATGG* (RNF43) and *CTCCAGACAGATGGCACAGTCGG* (ZNRF3)  
447 were accordingly cloned by described protocol into the pU6-(BbsI)CBh-Cas9-T2A-mCherry  
448 (Addgene #64324) and pSpCas9(BB)-2A-GFP (PX458) (Addgene #48138) backbones,  
449 transfected and sorted as single, GFP and mCherry double positive cells. Then analyzed by  
450 restriction enzymes Hin1II (ER1831, Thermo Fisher Scientific) and Taal as described above.  
451 Finally, PCR products were sequenced using the Illumina platform and compared with the  
452 reference sequence (Malcikova et al., 2015). Sequencing results are presented in the  
453 Supplementary Table 1.

454

#### 455 4. *RNF43* BioID analysis

456 Following IP washes, bead bound protein complexes were processed directly on beads  
457 covering protein reduction (50mM dithiothreitol – DTT, 30min, 37°C), alkylation (50mM  
458 iodacetamide – IAA, 30min, 25°C, dark; IAA excess quenched by additional DTT) and trypsin  
459 digestion (750ng of sequencing grade trypsin, Promega) in 50mM NaHCO<sub>3</sub> buffer. Beads were  
460 incubated at 37°C with mild agitation for 14 hours. Resulting peptides were extracted into LC-MS  
461 vials by 2.5% formic acid (FA) in 50% acetonitrile (ACN) and 100% ACN with addition of  
462 polyethylene glycol (20,000; final concentration 0.001%) (Stejskal et al., 2013) and concentrated  
463 in a SpeedVac concentrator (Thermo Fisher Scientific).

464 LC-MS/MS analyses of all peptide mixtures were done using RSLCnano system (SRD-  
465 3400, NCS-3500RS CAP, WPS-3000 TPL RS) connected to Orbitrap Elite hybrid spectrometer  
466 (Thermo Fisher Scientific). Prior to LC separation, tryptic digests were online concentrated and  
467 desalted using trapping column (100 µm × 30 mm, 40°C) filled with 3.5-µm X-Bridge BEH 130  
468 C18 sorbent (Waters). After washing of trapping column with 0.1% FA, the peptides were eluted  
469 (flow 300 nl/min) from the trapping column onto an analytical column (Acclaim Pepmap100 C18,  
470 3 µm particles, 75 µm × 500 mm, 40°C; Thermo Fisher Scientific) by 100 min nonlinear gradient  
471 program (1-56% of mobile phase B; mobile phase A: 0.1% FA in water; mobile phase B: 0.1% FA  
472 in 80% ACN). Equilibration of the trapping column and the column was done prior to sample  
473 injection to sample loop. The analytical column outlet was directly connected to the Digital  
474 PicoView 550 (New Objective) ion source with sheath gas option and SilicaTip emitter (New  
475 Objective; FS360-20-15-N-20-C12) utilization. ABIRD (Active Background Ion Reduction Device,  
476 ESI Source Solutions) was installed.

477 MS data were acquired in a data-dependent strategy selecting up to top 10 precursors  
478 based on precursor abundance in the survey scan (350-2000 m/z). The resolution of the survey  
479 scan was 60 000 (400 m/z) with a target value of  $1 \times 10^6$  ions, one microscan and maximum  
480 injection time of 200 ms. HCD MS/MS (32% relative fragmentation energy) spectra were acquired  
481 with a target value of 50 000 and resolution of 15 000 (400 m/z). The maximum injection time for  
482 MS/MS was 500 ms. Dynamic exclusion was enabled for 45 s after one MS/MS spectra  
483 acquisition and early expiration was disabled. The isolation window for MS/MS fragmentation was  
484 set to 2 m/z.

485 Data are available via ProteomeXchange (Deutsch et al., 2020) with identifier PXD020478  
486 in the PRIDE database (Perez-Riverol et al., 2019). The analysis of the mass spectrometric RAW  
487 data files was carried out using the MaxQuant software (version 1.6.2.10) using default settings  
488 unless otherwise noted. MS/MS ion searches were done against modified cRAP database (based  
489 on <http://www.thegpm.org/crap>) containing protein contaminants like keratin, trypsin etc., and  
490 UniProtKB protein database for *Homo sapiens*  
491 ([ftp://ftp.uniprot.org/pub/databases/uniprot/current\\_release/knowledgebase/reference\\_proteomes/Eukaryota/UP000005640\\_9606.fasta.gz](ftp://ftp.uniprot.org/pub/databases/uniprot/current_release/knowledgebase/reference_proteomes/Eukaryota/UP000005640_9606.fasta.gz); downloaded 19.8.2018, version 2018/08, number of  
492 protein sequences 21,053). Oxidation of methionine and proline, deamidation (N, Q) and  
493 acetylation (protein N-terminus) as optional modification, carbamidomethylation (C) as fixed  
494 modification and trypsin/P enzyme with 2 allowed miss cleavages were set. Peptides and proteins  
495 with FDR threshold  $<0.01$  and proteins having at least one unique or razor peptide were  
496 considered only. Match between runs was set among all analyzed samples. Protein abundance  
497 was assessed using protein intensities calculated by MaxQuant. Protein intensities reported in  
498 proteinGroups.txt file (output of MaxQuant) were further processed using the software container  
499 environment (<https://github.com/OmicsWorkflows>), version 3.7.2a. Processing workflow is  
500 available upon request. Briefly, it covered: a) removal of decoy hits and contaminant protein  
501 groups, b) protein group intensities log<sub>2</sub> transformation, c) LoessF normalization, d) imputation  
502 by the global minimum and e) differential expression using LIMMA statistical test. Prior to volcano  
503 plot plotting, suspected BirA\* binders were filtered out (proteins identified on at least 2 peptides  
504 in both technical replicates of particular BirA\* sample, and present in  $>3$  samples). Volcano plot  
505 was created in R using ggplot2 and ggrepel R packages by R version 3.6.1. Proteins with adjusted  
506 p-value  $<0.05$  and log fold change  $>1$  were further subjected to gene ontology tools, considering  
507 only the first ID of majority protein IDs: g:Profiler online tool (<https://biit.cs.ut.ee/gprofiler/gost>,  
508 version e98\_eg45\_p14\_ce5b097) (Raudvere et al., 2019) was used and selected GO terms were  
509

510 highlighted. RNF43 interactors from BioID assay are listed in the Figure 1 Supplementary table 1  
511 and results obtained by g:Profiler are present in the Figure 1 Supplementary table 2.

512

### 513 *5. Transfection*

514 T-REx™-293 cells were transfected using 1 µg/ml, pH 7.4 polyethylenimine (PEI) and  
515 plasmid DNA in 4:1 ratio (Pačlíková et al., 2017). Plasmid DNA in amount of 3 µg for 6 cm culture  
516 dish (ubiquitination assay) and 6 µg for 10 cm dish (co-immunoprecipitation or stable cell lines  
517 preparation). Approximately  $1 \times 10^6$  of A375 and A375 IV cells were electroporated with 6 µg of  
518 plasmid DNA utilizing Neon Transfection System (Thermo Fisher Scientific) 1200V, 40 ms, 1  
519 pulse. Culture media were changed six hours post-transfection.

520

### 521 *6. His-ubiquitin pulldown assay*

522 Cells were transfected with the plasmid encoding polyhistidine-tagged ubiquitin, RNF43-  
523 HA or enzymatically inactive RNF43, protein of interest and cultured overnight. Next, cells were  
524 treated with 0.2 µM epoxomicin (E3652, Sigma) for 4 hours and lysed in the buffer containing: 6M  
525 guanidine hydrochloride (G3272, Sigma), 0.1 M  $\text{Na}_x\text{H}_x\text{PO}_4$  pH 8.0 and 10 mM imidazole (I5513,  
526 Sigma), sonicated and boiled. Insoluble fraction was removed by the centrifugation (16 000g, RT,  
527 10 min). For the pull down of tagged proteins, 10 µl of equilibrated in lysis buffer His Mag  
528 Sepharose beads Ni (GE28-9799-17, GE Healthcare) was added to each sample and kept on a  
529 roller overnight. Then, beads were washed three times in the buffer containing 8M urea (U5378,  
530 Sigma), 0.1 M  $\text{Na}_x\text{H}_x\text{PO}_4$  pH 6.3, 0.01 M Tris and 15 mM imidazole, resuspended in the 100 µl of  
531 Western blot sample buffer, boiled for 5 minutes and loaded onto SDS-PAGE gel. Approximately  
532 10% of cellular lysate was used as a transfection control after ethanol precipitation and  
533 resuspension in the Western blot sample buffer.

534

### 535 *7. Western blotting and antibodies*

536 Western blot analysis was performed as it was described before using samples with same  
537 protein amount, measured by the DC Protein Assay (5000111, Bio-Rad), or lysed directly in the  
538 sample buffer (2% SDS, 10% glycerol, 5% β-mercaptoethanol, 0.002% bromphenol blue and 0.06  
539 M Tris HCl, pH 6.8 and Protease inhibitor cocktail (11836145001, Roche) after PBS wash (Mentink

540 et al., 2018). Protein extraction from mouse tissues was done by homogenizing in the 1% SDS,  
541 100 mM NaCl, 100 mM Tris, pH 7.4 buffer, sonication, clarification by centrifugation (16000g, 4°C,  
542 15 min) and protein concentration measurement. Next, 25 µg of protein samples was mixed with  
543 Western blot sampling buffer and loaded onto SDS-PAGE gels. Briefly, after electrophoretic  
544 separation, proteins were transferred onto Immobilon-P PVDF Membrane (IPVH00010, Millipore)  
545 and detected using primary and corresponding HRP-conjugated secondary antibodies on Fusion  
546 SL imaging system (Vibler) using Immobilon Western Chemiluminescent HRP Substrate (Merck,  
547 WBKLS0500). Molecular size of bands is marked in each panel [kDa]. List of used antibodies is  
548 present in the Table 2.

549

550

551

552

553

554

555

556

557

558

559

560 **Table 2 – Antibodies**

| Antibody                                     | Manufacturer                                | Dilution and application                | Reference                       |
|----------------------------------------------|---------------------------------------------|-----------------------------------------|---------------------------------|
| β-ACTIN CS-4970                              | CS-4970, Cell Signaling Technology          | 1:3000, WB                              | (Kaiser <i>et al</i> , 2019)    |
| DVL-2                                        | CS-3216, Cell Signaling Technology          | 1:1000, WB                              | (Mentink <i>et al</i> , 2018)   |
| DVL-3                                        | CS-3218, Cell Signaling Technology          | 1:1000, WB                              | (Mentink <i>et al</i> , 2018)   |
| DVL-3                                        | SC-8027, Santa Cruz Biotechnology           | 1:1000, WB                              | (Kaiser <i>et al</i> , 2019)    |
| Phospho-p44/42 MAPK (Erk1/2) (Thr202/Tyr204) | CS-9101, Cell Signaling Technology          | 1:1000, WB                              | (Kučera <i>et al</i> , 2017)    |
| ROR1                                         | kind gift from Henry Ho                     | 1:3000, WB                              | (Ho <i>et al</i> , 2012)        |
| ROR2                                         | sc-374174, Santa Cruz Biotechnology         | 1:1000, WB                              | (Ozeki <i>et al</i> , 2016)     |
| WNT5A                                        | MAB645, R&D                                 | 1:500, WB                               | (Kaiser <i>et al</i> , 2019)    |
| VANGL2 2G4                                   | MABN750, Merck                              | 1:500, WB                               | (Mentink <i>et al</i> , 2018)   |
| HA-11                                        | MMS-101R, Covance                           | 1:2000 WB; 1:500, IF; 1 µg IP           | (Pačliková <i>et al</i> , 2017) |
| HA                                           | ab9110, Abcam                               | 1:2000 WB; 1:500 IF; 1 µg IP; 1:1000 FC | (Pačliková <i>et al</i> , 2017) |
| c-Myc (9E10)                                 | sc-40, Santa Cruz Biotechnology             | 1:500 WB; 1:250 IF; 1 µg IP             | (Hanáková <i>et al</i> , 2019)  |
| GFP 3H9                                      | 3H9, Chromotek                              | 1:2000 WB; 1 µg IP                      | (Harnoš <i>et al</i> , 2019)    |
| GFP                                          | 20R-GR-011, Fitzgerald                      | 1:2000 WB; 1 µg IP                      | (Hanáková <i>et al</i> , 2019)  |
| FLAG M2                                      | F3165-1MG, Sigma-Aldrich                    | 1:2000 WB, 1:500 IF                     | (Pačliková <i>et al</i> , 2017) |
| FLAG                                         | F7425, Sigma                                | 1:2000 WB; 1:500 IF                     | (Pačliková <i>et al</i> , 2017) |
| V5                                           | R96025, Thermo Fisher Scientific            | 1:1000 WB, 1:1000 IF; 1 µg IP           | (Kaiser <i>et al</i> , 2019)    |
| Cortactin                                    | sc-55579, Santa Cruz Biotechnology          | 1:250 IF                                | (Weeber <i>et al</i> , 2019)    |
| a-mouse IgG HRP                              | A4416                                       | 1:4000 WB                               | Broadly used                    |
| a-rabbit IgG HRP                             | A0545                                       | 1:4000 WB                               | Broadly used                    |
| a-rat IgG HRP                                | A9037                                       | 1:4000 WB                               | Broadly used                    |
| Streptavidin-HRP conjugate                   | ab7403, Abcam                               | 1:4000 WB                               | Broadly used                    |
| Ror1-APC                                     | (#130-119-860, Miltenyi Biotec)             | 1:25 FC                                 | (Kotašková <i>et al</i> , 2016) |
| a-mouse Alexa Fluor™ 488 and 568             | A-11001 and A10037 Thermo Fisher Scientific | 1:600 IF                                | Broadly used                    |
| a-rabbit Alexa Fluor™ 488 and 568            | A21206 and A11011, Thermo Fisher Scientific | 1:600 IF                                | Broadly used                    |
| Streptavidin, Alexa Fluor™ 488 Conjugate     | S-32354, Thermo Fisher Scientific           | 1:600 IF                                | Broadly used                    |
| Phalloidine Alexa Fluor™ 594                 | A12381, Thermo Fisher Scientific            | 1:600 IF                                | Broadly used                    |
| Phalloidine 4 Alexa Fluor™ 488               | A12379, Thermo Fisher Scientific            | 1:600 IF                                | Broadly used                    |

561

562 **8. Immunofluorescence and confocal microscopy**

563 Cells growing on the glass were fixed in 4% paraformaldehyde (PFA) in PBS. Fixed cells  
564 were permeabilized by the 0.1% Triton X-100 in PBS and blocked in the 1% solution of bovine  
565 serum albumin in PBS. Then, samples were incubated overnight at 4°C with primary antibodies  
566 diluted in the 1% BSA in PBS and washed. Corresponding Alexa Fluor secondary antibodies  
567 (Invitrogen) were incubated with samples for 1h at room temperature, along with the 1 µg/ml  
568 Hoechst 33342 (H1399, Thermo Fisher Scientific) for nuclei staining. After PBS washes, samples  
569 were mounted in the DAKO mounting medium (S3023, DAKO). Images were taken on the  
570 confocal laser scanning microscopy platform Leica TCS SP8 (Leica). For co-localization analysis  
571 histograms for each channel were prepared in the LAS X Life Science (Leica) software and plotted  
572 in the GraphPad Prism 8.

573

574 **9. Immunoprecipitation**

575 T-REx-293 cells were transfected with the proper plasmid DNA and cultured for 24 hours.  
576 Then, cells were washed two times with PBS and lysed for 15 min in the buffer containing 50 mM  
577 Tris pH7.6, 200 mM NaCl, 1 mM EDTA, 0.5% NP40, fresh 0.1mM DTT (E3876, Sigma) and  
578 protease inhibitor cocktail (04693159001, Roche). Insoluble fraction was removed by the  
579 centrifugation (16 000g, RT, 15 min), 10% of total cell lysate was kept as Western blot control.  
580 Lysates were incubated with the 1 µg of antibody for 16 h at 4°C on the head-over-tail rotator.  
581 Next, 20 µl of protein G-Sepharose beads (17-0618-05; GE Healthcare) equilibrated in the  
582 complete lysis buffer were added to each sample and incubated for 4 hours at 4°C, following six  
583 washes using lysis buffer and resuspension in 100 µl of Western blot sample buffer.  
584 Immunoprecipitation experiments were analyzed by the Western blot.

585

586 **10. Flow cytometric determination of ROR1 surface expression**

587 Determination of the ROR1 surface expression of T-REx™-293 and its derivatives was  
588 performed using the anti-ROR1-APC (#130-119-860, Miltenyi Biotec) and Accuri C6 (BD  
589 Biosciences) (*RNF43/ZNRF3* dKO cells) or using BD FACSVerser Flow Cytometer (BD  
590 Biosciences) (TetON cells). Cells were harvested in 0.5 mM EDTA/PBS, washed in PBS and  
591 incubated in 2% FBS in PBS with anti-ROR1-APC antibody (1:25, #130-119-860, Miltenyi Biotec)  
592 on ice for 30 minutes. The cells were washed and resuspended in PBS, incubated with propidium

593 iodide (10 ng/ml, #81845, Sigma-Aldrich) for 5 minutes to exclude dead cells from analysis. For  
594 the detection of ROR1 surface expression in HA positive cells, ROR1-APC stained cells were  
595 washed in PBS, fixed in 4% PFA at RT for 15 minutes, permeabilized in 0,02% Triton X-100 at  
596 RT for 15 minutes and incubated with anti-HA antibody (1:1000, #9110, Abcam) in staining buffer  
597 at RT for 30 minutes. After two washes, cells were incubated with secondary antibody ALEXA  
598 Fluor® 488 Donkey anti-Rabbit (#A21206, Invitrogen) at RT for 20 minutes, washed and

599 measured using FACS Verse (BD Biosciences). Data were analyzed using NovoExpress®  
600 Software (ACEA Biosciences).

601

### 602 11. qPCR - quantitative polymerase chain reaction

603 Messenger RNA was isolated using the RNeasy Mini Kit (74106; Qiagen) according to  
604 the manufacturer's instructions. One microgram of mRNA was transcribed to cDNA by the  
605 RevertAid Reverse Transcriptase (EP0442, Thermo Fisher Scientific) and analyzed by use of  
606 the LightCycler® 480 SYBR Green I Master (04887352001, Roche) and the Light Cycler LC480  
607 (Roche). Results are presented as  $2^{-\Delta\Delta CT}$  and compared by unpaired Student's *t* test. Mean  
608 expression of *B2M* and *GAPDH* was used as reference. Primers are listed in the Table 3.

609 **Table 3 – qPCR primers**

| GENE         | Forward primer           | Reverse primer           | Product size |
|--------------|--------------------------|--------------------------|--------------|
| <i>B2M</i>   | CACCCCCACTGAAAAAGATG     | ATATTAAAAAGCAAGCAAGCAGAA | 167          |
| <i>GAPDH</i> | GACAGTCAGCCGCATCTTCT     | TTAAAAGCAGCCCTGGTGAC     | 127          |
| <i>RNF43</i> | TTTCCTGCCTCCATGAGTTC     | CAGGGACTGGGAAAATGAATC    | 116          |
| <i>ZNRF3</i> | GCTTCTTCGTCGTGGTCTC      | GCCTGTTCATGGAATTCTGAC    | 91           |
| <i>DVL2</i>  | TCCTTCCACCCTAATGTGTCCA   | CATGCTCACTGCTGTCTCTCCT   | 115          |
| <i>DVL3</i>  | ACCTTGGCGGACTTTAAGGG     | TCACCACTCCGAAATCGTCG     | 85           |
| <i>WNT5A</i> | GCAGCACTGTGGATAACACCTCTG | AACTCCTTGGCAAAGCGGTAGCC  | 244          |

610

611

612

613

614 **12. Databases**

615 RNF43, VANGL1, DVL3 genes expression on different melanoma stages was analyzed  
616 through the OncoPrint (Rhodes et al., 2004) database in the different datasets (Talantov et al.,  
617 2005), (Xu et al., 2008), (Haqq et al., 2005). OncoPrint (Anaya, 2016) database was employed to  
618 elucidate whether expression of the *RNF43*, *ZNRF3*, *VANGL1* and *DVL3* genes expression  
619 have significant impact on the melanoma patients overall survival. RNF43 BioID data are  
620 available via ProteomeXchange (Deutsch et al, 2020) in the PRIDE database (PXD020478)  
621 (Perez-Riverol et al, 2019).

622

623 **13. Wound healing assay, Matrigel invasion assay, Fluorescent gelatin degradation assay,**  
624 **Invadopodia formation assay**

625 For determination of the cellular motility and invasive properties *in vitro* wound healing  
626 (O'Connell et al., 2008), matrigel invasion towards 20% FBS as chemoattractant followed by the  
627 crystal violet staining of invaded cells (Makowiecka et al., 2016), fluorescent gelatin degradation  
628 in the presence of 5% FBS after overnight starvation (Makowiecka et al., 2016) and invadopodia  
629 formation assays (Makowiecka et al., 2016) were prepared according to the established protocols.  
630 The wound gap was photographed using the Olympus ix51 inverted fluorescence microscope  
631 after 24 h and 48h from scratch. Wound width was measured by use of the QuickPHOTO MICRO  
632 3.0 software. For the fluorescent gelatin degradation assay purpose, 80 ng/ml of rhWNT5A was  
633 used during 16 h of cells incubation on the coverslips coated with gelatin-Oregon Green conjugate  
634 (G13186, Thermo Fisher Scientific). Alexa Fluor 594 phalloidin (A12381, Thermo Fisher Scientific)  
635 and TO-PRO-3 Iodide (642/661) were employed for the cells visualization on confocal microscopy  
636 platform Leica TCS SP8. For invadopodia formation assay, immunofluorescence imaging protocol  
637 employing phalloidin and anti-cortactin antibody was performed. Invadopodia – as structures  
638 double positive for F-actin and cortactin staining, were quantified for tested cell lines and  
639 conditions and presented as number of invadopodia per one cell. Two independent repetitions  
640 were performed.

641

642 **14. Colony formation assay**

643 To assess an ability to colony formation in the presence of 0.3  $\mu$ M vemurafenib, 300 of  
644 melanoma cells were plated onto 24-well plate and were subsequently cultured for seven days.



645 After that time, medium was removed and colonies were washed in PBS, fixed in the ice-cold  
646 methanol for 30 min and stained in the 0.5% crystal violet in 25% methanol. After washing and  
647 drying, bound crystal violet was eluted with 10% acetic acid and absorbance at 590 nm was  
648 measured on Tecan Sunrise plate reader. Results were normalized to the non-treated A375 wild  
649 type results.

650

## 651 *15. Software, statistics*

652 Statistical significance was confirmed by two-tailed paired or unpaired Student's t tests.  
653 Statistical significance levels were defined as \*P < 0.05; \*\*P < 0.01; \*\*\*P < 0.001, \*\*\*\*p<0.0001.  
654 All statistical details including number of biological or technical replicates can be found in each  
655 figure legend. Statistical analysis and data visualization were performed in GraphPad Prism 8.0  
656 software. Graphs are presented with error bars as  $\pm$  SD if not stated differently in the figure  
657 legends.

## 658 **Acknowledgments**

659 We would like to thank Lucie Nesvadbová, Lenka Bryjová, Pavlína Žofka Mrháková,  
660 Lenka Doubková and Naďa Bílá for excellent assistance and also to Tomáš Bárta for technical  
661 support.

## 662 **Funding:**

663 The work was supported by the Czech Science Foundation grant GX19-28347X. CIISB,  
664 Instruct-CZ Centre of Instruct-ERIC EU consortium, funded by MEYS CR infrastructure project  
665 LM2018127, is gratefully acknowledged for the financial support of the measurements at the  
666 CEITEC Proteomics Core Facility. Computational resources for proteomics data processing were  
667 supplied by the project "e-Infrastruktura CZ" (e-INFRA LM2018140) provided within the program  
668 Projects of Large Research, Development and Innovations Infrastructures.

## 669 **Author contributions**

670 TR, LK, ZZ, KS and VB designed the experiments and analyzed the data. TR, MN, KG,  
671 OVB, KAR, MP, RV, TG, KK, LD, LK, DP and KS performed the experiments. TR and VB wrote  
672 the manuscript. All authors discussed the results and commented on the manuscript.

673 **Competing interests**

674 The authors declare that there is no conflict of interest regarding the publication of this  
675 article.

676 **References**

- 677 Akbani R, Akdemir KC, Aksoy BA, Albert M, Ally A, Amin SB, Arachchi H, Arora A, Auman JT, Ayala B, Baboud J, Balasundaram M,  
678 Balu S, Barnabas N, Bartlett J, Bartlett P, Bastian BC, Baylin SB, Behera M, Belyaev D, Benz C, Bernard B, Beroukhir R, Bir  
679 N, Black AD, Bodenheimer T, Boice L, Boland GM, Bono R, Bootwalla MS, Bosenberg M, Bowen J, Bowlby R, Bristow CA,  
680 Brockway-Lunardi L, Brooks D, Brzezinski J, Bshara W, Buda E, Burns WR, Butterfield YSN, Button M, Calderone T,  
681 Cappellini GA, Carter C, Carter SL, Cherney L, Cherniack AD, Chevalier A, Chin L, Cho J, Cho RJ, Choi Y-L, Chu A,  
682 Chudamani S, Cibulskis K, Ciriello G, Clarke A, Coons S, Cope L, Crain D, Curley E, Danilova L, D'Atri S, Davidsen T,  
683 Davies MA, Delman KA, Demchok JA, Deng QA, Deribe YL, Dhalla N, Dhir R, DiCara D, Dinikin M, Dubina M, Ebrom JS,  
684 Egea S, Eley G, Engel J, Eschbacher JM, Fedosenko KV, Felau I, Fennell T, Ferguson ML, Fisher S, Flaherty KT, Frazer S,  
685 Frick J, Fulidou V, Gabriel SB, Gao J, Gardner J, Garraway LA, Gastier-Foster JM, Gaudioso C, Gehlenborg N, Genovese G,  
686 Gerken M, Gershenwald JE, Getz G, Gomez-Fernandez C, Gribbin T, Grimsby J, Gross B, Guin R, Gutschner T,  
687 Hadjipanayis A, Halaban R, Hanf B, Haussler D, Haydu LE, Hayes DN, Hayward NK, Heiman DI, Herbert L, Herman JG,  
688 Hersey P, Hoadley KA, Hodis E, Holt RA, Hoon DS, Hoppough S, Hoyle AP, Huang FW, Huang M, Huang S, Hutter CM, Ibbs  
689 M, Iype L, Jacobsen A, Jakrot V, Janning A, Jeck WR, Jefferys SR, Jensen MA, Jones CD, Jones SJM, Ju Z, Kakavand H,  
690 Kang H, Kefford RF, Khuri FR, Kim J, Kirkwood JM, Klode J, Korkut A, Korski K, Krauthammer M, Kucherlapati R, Kwong LN,  
691 Kycier W, Ladanyi M, Lai PH, Laird PW, Lander E, Lawrence MS, Lazar AJ, Łażniak R, Lee D, Lee JE, Lee J, Lee K, Lee S,  
692 Lee W, Leporowska E, Leraas KM, Li HI, Lichtenberg TM, Lichtenstein L, Lin P, Ling S, Liu J, Liu O, Liu W, Long GV, Lu Y,  
693 Ma S, Ma Y, Mackiewicz A, Mahadeshwar HS, Malke J, Mallery D, Manikhas GM, Mann GJ, Marra MA, Matejka B, Mayo M,  
694 Mehrabi S, Meng S, Meyerson M, Mieczkowski PA, Miller JP, Miller ML, Mills GB, Moiseenko F, Moore RA, Morris S,  
695 Morrison C, Morton D, Moschos S, Mose LE, Muller FL, Mungall AJ, Murawa D, Murawa P, Murray BA, Nezi L, Ng S,  
696 Nicholson D, Noble MS, Osunkoya A, Owonikoko TK, Ozenberger BA, Pagani E, Paklina OV, Pantazi A, Parfenov M, Parfitt  
697 J, Park PJ, Park W-Y, Parker JS, Passarelli F, Penny R, Perou CM, Pihl TD, Potapova O, Prieto VG, Protopopov A, Quinn  
698 MJ, Radenbaugh A, Rai K, Ramalingam SS, Raman AT, Ramirez NC, Ramirez R, Rao U, Rathmell WK, Ren X, Reynolds  
699 SM, Roach J, Robertson AG, Ross MI, Roszik J, Russo G, Saksena G, Saller C, Samuels Y, Sander Chris, Sander Cindy,  
700 Sandusky G, Santoso N, Saul M, Saw RP, Schadendorf D, Schein JE, Schultz N, Schumacher SE, Schwallier C, Scolyer RA,  
701 Seidman J, Sekhar PC, Sekhon HS, Senbabaoglu Y, Seth S, Shannon KF, Sharpe S, Sharpless NE, Shaw KRM, Shelton C,  
702 Shelton T, Shen R, Sheth M, Shi Y, Shiau CJ, Shmulevich I, Sica GL, Simons JV, Sinha R, Sipahimalani P, Sofia HJ,  
703 Soloway MG, Song X, Sougnez C, Spillane AJ, Spychala A, Stretch JR, Stuart J, Suchorska WM, Sucker A, Sumer SO, Sun  
704 Y, Synott M, Tabak B, Tabler TR, Tam A, Tan D, Tang J, Tarnuzzer R, Tarvin K, Tatka H, Taylor BS, Teresiak M, Thiessen  
705 N, Thompson JF, Thorne L, Thorsson V, Trent JM, Triche TJ, Tsai KY, Tsou P, Van Den Berg DJ, Van Allen EM, Veluvolu U,  
706 Verhaak RG, Voet D, Voronina O, Walter V, Walton JS, Wan Y, Wang Y, Wang Z, Waring S, Watson IR, Weinhold N,  
707 Weinstein JN, Weisenberger DJ, White P, Wilkerson MD, Wilmott JS, Wise L, Wiznerowicz M, Woodman SE, Wu C-J, Wu C-  
708 C, Wu J, Wu Y, Xi R, Xu AW, Yang D, Yang Liming, Yang Lixing, Zack TI, Zenklusen JC, Zhang H, Zhang J, Zhang W, Zhao  
709 X, Zhu J, Zhu K, Zimmer L, Zmuda E, Zou L. 2015. Genomic Classification of Cutaneous Melanoma. *Cell* **161**:1681–1696.  
710 doi:10.1016/J.CELL.2015.05.044
- 711 Anastas JN, Kulikauskas RM, Tamir T, Rizos H, Long G V., von Euw EM, Yang P-T, Chen H-W, Haydu L, Toroni RA, Lucero OM,  
712 Chien AJ, Moon RT, Euw EM von, Yang P-T, Chen H-W, Haydu L, Toroni RA, Lucero OM, Chien AJ, Moon RT. 2014.  
713 WNT5A enhances resistance of melanoma cells to targeted BRAF inhibitors **124**:2877–2890. doi:10.1172/JCI170156
- 714 Anaya J. 2016. OncoLnc: linking TCGA survival data to mRNAs, miRNAs, and lncRNAs. *PeerJ Comput Sci* **2**:e67.

- 715 doi:10.7717/peerj-cs.67
- 716 Andre P, Song H, Kim W, Kispert A, Yang Y. 2015. Wnt5a and Wnt11 regulate mammalian anterior-posterior axis elongation.  
717 *Development* **142**:1516–1527. doi:10.1242/dev.119065
- 718 Angers S, Thorpe CJ, Biechele TL, Goldenberg SJ, Zheng N, MacCoss MJ, Moon RT. 2006. The KLHL12–Cullin-3 ubiquitin ligase  
719 negatively regulates the Wnt– $\beta$ -catenin pathway by targeting Dishevelled for degradation. *Nat Cell Biol* **8**:348–357.  
720 doi:10.1038/ncb1381
- 721 Arozarena I, Wellbrock C. 2019. Phenotype plasticity as enabler of melanoma progression and therapy resistance. *Nat Rev Cancer*  
722 **19**:377–391. doi:10.1038/s41568-019-0154-4
- 723 Arozarena I, Wellbrock C. 2017a. Targeting invasive properties of melanoma cells. *FEBS J* **284**:2148–2162. doi:10.1111/febs.14040
- 724 Arozarena I, Wellbrock C. 2017b. Overcoming resistance to BRAF inhibitors. *Ann Transl Med* **5**:1–12. doi:10.21037/atm.2017.06.09
- 725 Asem M, Buechler S, Wates R, Miller D, Stack M. 2016. Wnt5a Signaling in Cancer. *Cancers (Basel)* **8**:79.  
726 doi:10.3390/cancers8090079
- 727 Astudillo P. 2020. Wnt5a Signaling in Gastric Cancer. *Front Cell Dev Biol*. doi:10.3389/fcell.2020.00110
- 728 Bache KG, Raiborg C, Mehlum A, Stenmark H. 2003. STAM and Hrs are subunits of a multivalent ubiquitin-binding complex on  
729 early endosomes. *J Biol Chem* **278**:12513–12521. doi:10.1074/jbc.M210843200
- 730 Belotti E, Puvirajesinghe TM, Audebert S, Baudelet E, Camoin L, Pierres M, Lasvaux L, Ferracci G, Montcouquiol M, Borg J-P.  
731 2012. Molecular Characterisation of Endogenous Vangl2/Vangl1 Heteromeric Protein Complexes. *PLoS One* **7**:e46213.  
732 doi:10.1371/journal.pone.0046213
- 733 Binnerts ME, Kim KA, Bright JM, Patel SM, Tran K, Zhou M, Leung JM, Liu Y, Lomas WE, Dixon M, Hazell SA, Wagle M, Nie WS,  
734 Tomasevic N, Williams J, Zhan X, Levy MD, Funk WD, Abo A. 2007. R-Spondin1 regulates Wnt signaling by inhibiting  
735 internalization of LRP6. *Proc Natl Acad Sci U S A* **104**:14700–14705. doi:10.1073/pnas.0702305104
- 736 Birkeland E, Zhang S, Poduval D, Geisler J, Nakken S, Vodak D, Meza-Zepeda LA, Hovig E, Myklebost O, Knappskog S, Lønning  
737 PE. 2018. Patterns of genomic evolution in advanced melanoma. *Nat Commun* **9**:2665. doi:10.1038/s41467-018-05063-1
- 738 Blitzer JT, Nusse R. 2006. A critical role for endocytosis in Wnt signaling. *BMC Cell Biol* **7**:28. doi:10.1186/1471-2121-7-28
- 739 Bollag G, Tsai J, Zhang J, Zhang C, Ibrahim P, Nolop K, Hirth P. 2012. Vemurafenib: The first drug approved for BRAF-mutant  
740 cancer. *Nat Rev Drug Discov*. doi:10.1038/nrd3847
- 741 Bond CE, McKeone DM, Kalimutho M, Bettington ML, Pearson S-A, Dumenil TD, Wockner LF, Burge M, Leggett BA, Whitehall VLJ.  
742 2016. RNF43 and ZNRF3 are commonly altered in serrated pathway colorectal tumorigenesis. *Oncotarget* **7**:70589–70600.  
743 doi:10.18632/oncotarget.12130
- 744 Bucci C, Parton RG, Mather IH, Stunnenberg H, Simons K, Hoflack B, Zerial M. 1992. The small GTPase rab5 functions as a  
745 regulatory factor in the early endocytic pathway. *Cell* **70**:715–728. doi:10.1016/0092-8674(92)90306-W
- 746 Carmon KS, Gong X, Lin Q, Thomas A, Liu Q. 2011. R-spondins function as ligands of the orphan receptors LGR4 and LGR5 to  
747 regulate Wnt/  $\beta$ -catenin signaling. *Proc Natl Acad Sci* **108**:11452–11457. doi:10.1073/pnas.1106083108
- 748 Chapman PB, Hauschild A, Robert C, Haanen JB, Ascierto P, Larkin J, Dummer R, Garbe C, Testori A, Maio M, Hogg D, Lorigan P,  
749 Lebbe C, Jouary T, Schadendorf D, Ribas A, O'Day SJ, Sosman JA, Kirkwood JM, Eggermont AMM, Dreno B, Nolop K, Li J,  
750 Nelson B, Hou J, Lee RJ, Flaherty KT, McArthur GA. 2011. Improved Survival with Vemurafenib in Melanoma with BRAF  
751 V600E Mutation. *N Engl J Med* **364**:2507–2516. doi:10.1056/NEJMoa1103782
- 752 Chen P-I, Kong C, Su X, Stahl PD. 2009. Rab5 isoforms differentially regulate the trafficking and degradation of epidermal growth  
753 factor receptors. *J Biol Chem* **284**:30328–38. doi:10.1074/jbc.M109.034546
- 754 Connacher MK, Tay JW, Ahn NG. 2017. Rear-polarized Wnt5a-receptor-actin-myosinpolarity (WRAMP) structures promote the

- 755 speed and persistence of directional cell migration. *Mol Biol Cell* **28**:1924–1936. doi:10.1091/mbc.E16-12-0875
- 756 Coyaud E, Mis M, Laurent EMN, Dunham WH, Couzens AL, Robitaille M, Gingras AC, Angers S, Raught B. 2015. BioID-based  
757 identification of skp cullin F-box (SCF) $\beta$ -TrCP1/2 E3 ligase substrates. *Mol Cell Proteomics* **14**:1781–1795.  
758 doi:10.1074/mcp.M114.045658
- 759 Cullis DN, Philip B, Baleja JD, Feig LA. 2002. Rab11-FIP2, an adaptor protein connecting cellular components involved in  
760 internalization and recycling of epidermal growth factor receptors. *J Biol Chem* **277**:49158–49166.  
761 doi:10.1074/jbc.M206316200
- 762 Da Forno PD, Pringle JH, Hutchinson P, Osborn J, Huang Q, Potter L, Hancox RA, Fletcher A, Saldanha GS. 2008. WNT5A  
763 Expression Increases during Melanoma Progression and Correlates with Outcome. *Clin Cancer Res* **14**. doi:10.1158/1078-  
764 0432.CCR-07-5104
- 765 Davies H, Bignell GR, Cox C, Stephens P, Edkins S, Clegg S, Teague J, Woffendin H, Garnett MJ, Bottomley W, Davis N, Dicks E,  
766 Ewing R, Floyd Y, Gray K, Hall S, Hawes R, Hughes J, Kosmidou V, Menzies A, Mould C, Parker A, Stevens C, Watt S,  
767 Hooper S, Jayatilake H, Gusterson BA, Cooper C, Shipley J, Hargrave D, Pritchard-Jones K, Maitland N, Chenevix-Trench G,  
768 Riggins GJ, Bigner DD, Palmieri G, Cossu A, Flanagan A, Nicholson A, Ho JWC, Leung SY, Yuen ST, Weber BL, Seigler HF,  
769 Darrow TL, Paterson H, Wooster R, Stratton MR, Futreal PA. 2002. Mutations of the BRAF gene in human cancer. *Nature*  
770 **417**:949–954. doi:10.1038/nature00766
- 771 de Lau W, Barker N, Low TY, Koo B-K, Li VSW, Teunissen H, Kujala P, Haegebarth A, Peters PJ, van de Wetering M, Stange DE,  
772 van Es J, Guardavaccaro D, Schasfoort RBM, Mohri Y, Nishimori K, Mohammed S, Heck AJR, Clevers H. 2011. Lgr5  
773 homologues associate with Wnt receptors and mediate R-spondin signalling. *Nature* **476**:293–297. doi:10.1038/nature10337
- 774 Deshar R, Moon S, Yoo W, Cho E-B, Yoon SK, Yoon J-B. 2016. RNF167 targets Arl8B for degradation to regulate lysosome  
775 positioning and endocytic trafficking. *FEBS J* **283**:4583–4599. doi:10.1111/febs.13947
- 776 Deutsch EW, Bandeira N, Sharma V, Perez-Riverol Y, Carver JJ, Kundu DJ, García-Seisdedos D, Jarnuczak AF, Hewapathirana S,  
777 Pullman BS, Wertz J, Sun Z, Kawano S, Okuda S, Watanabe Y, Hermjakob H, MacLean B, MacCoss MJ, Zhu Y, Ishihama Y,  
778 Vizcaíno JA. 2020. The ProteomeXchange consortium in 2020: enabling “big data” approaches in proteomics. *Nucleic Acids*  
779 *Res* **48**:D1145–D1152. doi:10.1093/nar/gkz984
- 780 Dissanayake SK, Olkhanud PB, O’connell MP, Carter A, French AD, Camilli TC, Emeche CD, Hewitt KJ, Rosenthal DT, Leotlela PD,  
781 Wade MS, Yang SW, Brant L, Nickoloff BJ, Messina JL, Biragyn A, Hoek KS, Taub DD, Longo DL, Sondak VK, Hewitt SM,  
782 Weeraratna AT. 2008. Wnt5A Regulates Expression of Tumor-Associated Antigens in Melanoma via Changes in Signal  
783 Transducers and Activators of Transcription 3 Phosphorylation. *Cancer Res* **68**:10205–10219. doi:10.1158/0008-5472.CAN-  
784 08-2149
- 785 Dissanayake SK, Wade M, Johnson CE, O’Connell MP, Leotlela PD, French AD, Shah K V., Hewitt KJ, Rosenthal DT, Indig FE,  
786 Jiang Y, Nickoloff BJ, Taub DD, Trent JM, Moon RT, Bittner M, Weeraratna AT. 2007. The Wnt5A/protein kinase C pathway  
787 mediates motility in melanoma cells via the inhibition of metastasis suppressors and initiation of an epithelial to mesenchymal  
788 transition. *J Biol Chem* **282**:17259–71. doi:10.1074/jbc.M700075200
- 789 Eddy RJ, Weidmann MD, Sharma VP, Condeelis JS. 2017. Tumor Cell Invadopodia: Invasive Protrusions that Orchestrate  
790 Metastasis. *Trends Cell Biol*. doi:10.1016/j.tcb.2017.03.003
- 791 Ekström EJ, Bergenfelz C, von Bülow V, Serifler F, Carlemalm E, Jönsson G, Andersson T, Leandersson K. 2014. WNT5A induces  
792 release of exosomes containing pro-angiogenic and immunosuppressive factors from malignant melanoma cells. *Mol Cancer*  
793 **13**:88. doi:10.1186/1476-4598-13-88
- 794 Eto T, Miyake K, Noshō K, Ohmuraya M, Imamura Y, Arima K, Kanno S, Fu L, Kiyozumi Y, Izumi D, Sugihara H, Hiyoshi Y,  
795 Miyamoto Y, Sawayama H, Iwatsuki M, Baba Y, Yoshida N, Furukawa T, Araki K, Baba H, Ishimoto T. 2018. Impact of loss-  
796 of-function mutations at the *RNF43* locus on colorectal cancer development and progression. *J Pathol* **245**:445–455.

- 797 doi:10.1002/path.5098
- 798 Fernández NB, Lorenzo D, Picco ME, Barbero G, Dergan-Dylon LS, Marks MP, García-Rivello H, Gimenez L, Labovsky V,  
799 Grumolato L, Lopez-Bergami P. 2016. ROR1 contributes to melanoma cell growth and migration by regulating N-cadherin  
800 expression via the PI3K/Akt pathway. *Mol Carcinog* **55**:1772–1785. doi:10.1002/mc.22426
- 801 Flaherty KT, Puzanov I, Kim KB, Ribas A, McArthur GA, Sosman JA, O'Dwyer PJ, Lee RJ, Grippo JF, Nolop K, Chapman PB. 2010.  
802 Inhibition of Mutated, Activated BRAF in Metastatic Melanoma. *N Engl J Med* **363**:809–819. doi:10.1056/NEJMoa1002011
- 803 Gao B, Song H, Bishop K, Elliot G, Garrett L, English MA, Andre P, Robinson J, Sood R, Minami Y, Economides AN, Yang Y. 2011.  
804 Wnt Signaling Gradients Establish Planar Cell Polarity by Inducing Vangl2 Phosphorylation through Ror2. *Dev Cell* **20**:163–  
805 176. doi:10.1016/J.DEVCEL.2011.01.001
- 806 Gao Y, Cai A, Xi H, Li J, Xu W, Zhang Y, Zhang K, Cui J, Wu X, Wei B, Chen L. 2017. Ring finger protein 43 associates with gastric  
807 cancer progression and attenuates the stemness of gastric cancer stem-like cells via the Wnt- $\beta$ -catenin signaling pathway.  
808 *Stem Cell Res Ther* **8**. doi:10.1186/s13287-017-0548-8
- 809 Gentile A, Lazzari L, Benvenuti S, Trusolino L, Comoglio PM. 2011. Ror1 Is a Pseudokinase That Is Crucial for Met-Driven  
810 Tumorigenesis. *Cancer Res* **71**:3132–3141. doi:10.1158/0008-5472.CAN-10-2662
- 811 Giannakis M, Hodis E, Jasmine Mu X, Yamauchi M, Rosenbluh J, Cibulskis K, Saksena G, Lawrence MS, Qian ZR, Nishihara R,  
812 Van Allen EM, Hahn WC, Gabriel SB, Lander ES, Getz G, Ogino S, Fuchs CS, Garraway LA. 2014. RNF43 is frequently  
813 mutated in colorectal and endometrial cancers. *Nat Genet* **46**:1264–1266. doi:10.1038/ng.3127
- 814 Glinka A, Dolde C, Kirsch N, Huang Y-L, Kazanskaya O, Ingelfinger D, Boutros M, Cruciat C-M, Niehrs C. 2011. LGR4 and LGR5  
815 are R-spondin receptors mediating Wnt/ $\beta$ -catenin and Wnt/PCP signalling. *EMBO Rep* **12**:1055–61.  
816 doi:10.1038/embor.2011.175
- 817 Hanaki H, Yamamoto H, Sakane H, Matsumoto S, Ohdan H, Sato A, Kikuchi A. 2012. An anti-Wnt5a antibody suppresses  
818 metastasis of gastric cancer cells in vivo by inhibiting receptor-mediated endocytosis. *Mol Cancer Ther* **11**:298–307.  
819 doi:10.1158/1535-7163.MCT-11-0682
- 820 Hao H-X, Jiang X, Cong F. 2016. Control of Wnt Receptor Turnover by R-spondin-ZNRF3/RNF43 Signaling Module and Its  
821 Dysregulation in Cancer. *Cancers (Basel)* **8**:54. doi:10.3390/cancers8060054
- 822 Hao H-X, Xie Y, Zhang Y, Charlat O, Oster E, Avello M, Lei H, Mickanin C, Liu D, Ruffner H, Mao X, Ma Q, Zamponi R,  
823 Bouwmeester T, Finan PM, Kirschner MW, Porter JA, Serluca FC, Cong F. 2012. ZNRF3 promotes Wnt receptor turnover in  
824 an R-spondin-sensitive manner. *Nature* **485**:195–200. doi:10.1038/nature11019
- 825 Haqq C, Nosrati M, Sudilovsky D, Crothers J, Khodabakhsh D, Pulliam BL, Federman S, Miller JR, Allen RE, Singer MI, Leong SPL,  
826 Ljung BM, Sagebiel RW, Kashani-Sabet M. 2005. The gene expression signatures of melanoma progression. *Proc Natl Acad*  
827 *Sci U S A* **102**:6092–6097. doi:10.1073/pnas.0501564102
- 828 Harris A, Siggers P, Corrochano S, Warr N, Sagar D, Grimes DT, Suzuki M, Burdine RD, Cong F, Koo BK, Clevers H, Stévant I, Nef  
829 S, Wells S, Brauner R, Rhouma B Ben, Belguith N, Eozenou C, Bignon-Topalovic J, Bashamboo A, McElreavey K,  
830 Greenfield A. 2018. ZNRF3 functions in mammalian sex determination by inhibiting canonical WNT signaling. *Proc Natl Acad*  
831 *Sci U S A* **115**:5474–5479. doi:10.1073/pnas.1801223115
- 832 Hershko A, Ciechanover A. 1998. THE UBIQUITIN SYSTEM. *Annu Rev Biochem* **67**:425–479.  
833 doi:10.1146/annurev.biochem.67.1.425
- 834 Hirst J, Irving C, Borner GHH. 2013. Adaptor Protein Complexes AP-4 and AP-5: New Players in Endosomal Trafficking and  
835 Progressive Spastic Paraplegia. *Traffic* **14**:153–164. doi:10.1111/tra.12028
- 836 Hodis E, Watson IR, Kryukov G V., Arold ST, Imielinski M, Theurillat JP, Nickerson E, Auclair D, Li L, Place C, Dicara D, Ramos AH,  
837 Lawrence MS, Cibulskis K, Sivachenko A, Voet D, Saksena G, Stransky N, Onofrio RC, Winckler W, Ardlie K, Wagle N,

- 838 Wargo J, Chong K, Morton DL, Stemke-Hale K, Chen G, Noble M, Meyerson M, Ladbury JE, Davies MA, Gershenwald JE,  
839 Wagner SN, Hoon DSB, Schadendorf D, Lander ES, Gabriel SB, Getz G, Garraway LA, Chin L. 2012. A landscape of driver  
840 mutations in melanoma. *Cell* **150**:251–263. doi:10.1016/j.cell.2012.06.024
- 841 Humphries AC, Mlodzik M. 2018. From instruction to output: Wnt/PCP signaling in development and cancer. *Curr Opin Cell Biol*  
842 **51**:110–116. doi:10.1016/J.CEB.2017.12.005
- 843 Janovská P, Bryja V. 2017. Wnt signalling pathways in chronic lymphocytic leukaemia and B-cell lymphomas. *Br J Pharmacol*.  
844 doi:10.1111/bph.13949
- 845 Jiang X, Charlat O, Zamponi R, Yang Y, Cong F. 2015. Dishevelled Promotes Wnt Receptor Degradation through Recruitment of  
846 ZNRF3/RNF43 E3 Ubiquitin Ligases. *Mol Cell* **58**:522–533. doi:10.1016/J.MOLCEL.2015.03.015
- 847 Jiang X, Hao H-X, Growney JD, Woolfenden S, Bottiglio C, Ng N, Lu B, Hsieh MH, Bagdasarian L, Meyer R, Smith TR, Avello M,  
848 Charlat O, Xie Y, Porter JA, Pan S, Liu J, McLaughlin ME, Cong F. 2013. Inactivating mutations of RNF43 confer Wnt  
849 dependency in pancreatic ductal adenocarcinoma. *Proc Natl Acad Sci* **110**:12649–12654. doi:10.1073/PNAS.1307218110
- 850 Jo YS, Kim MS, Lee JH, Lee SH, An CH, Yoo NJ. 2015. Frequent frameshift mutations in 2 mononucleotide repeats of RNF43 gene  
851 and its regional heterogeneity in gastric and colorectal cancers. *Hum Pathol* **46**:1640–1646.  
852 doi:10.1016/J.HUMPATH.2015.07.004
- 853 Johnson DB, Menzies AM, Zimmer L, Eroglu Z, Ye F, Zhao S, Rizos H, Sucker A, Scolyer RA, Gutzmer R, Gogas H, Kefford RF,  
854 Thompson JF, Becker JC, Berking C, Egberts F, Loquai C, Goldinger SM, Pupo GM, Hugo W, Kong X, Garraway LA,  
855 Sosman JA, Ribas A, Lo RS, Long G V., Schadendorf D. 2015. Acquired BRAF inhibitor resistance: A multicenter meta-  
856 analysis of the spectrum and frequencies, clinical behaviour, and phenotypic associations of resistance mechanisms. *Eur J*  
857 *Cancer* **51**:2792–2799. doi:10.1016/J.EJCA.2015.08.022
- 858 Joseph EW, Pratilas CA, Poulikakos PI, Tadi M, Wang W, Taylor BS, Halilovic E, Persaud Y, Xing F, Viale A, Tsai J, Chapman PB,  
859 Bollag G, Solit DB, Rosen N. 2010. The RAF inhibitor PLX4032 inhibits ERK signaling and tumor cell proliferation in a V600E  
860 BRAF-selective manner. *Proc Natl Acad Sci U S A* **107**:14903–8. doi:10.1073/pnas.1008990107
- 861 Kaiser K, Jang A, Lun MP, Procházká J, Machon O, Procházková M, Laurent B, Gyllborg D, van Amerongen R, Kompaníková P,  
862 Wu F, Barker RA, Uramová I, Sedláček R, Kozmik Z, Arenas E, Lehtinen MK, Bryja V. 2020. MEIS-WNT5A axis regulates  
863 development of 4<sup>th</sup> ventricle choroid plexus. *bioRxiv* 2020.05.07.082370.  
864 doi:10.1101/2020.05.07.082370
- 865 Kanzawa M, Semba S, Hara S, Itoh T, Yokozaki H. 2013. WNT5A is a Key Regulator of the Epithelial-Mesenchymal Transition and  
866 Cancer Stem Cell Properties in Human Gastric Carcinoma Cells. *Pathobiology* **80**:235–244. doi:10.1159/000346843
- 867 Katoh M. 2007. Networking of WNT, FGF, Notch, BMP, and Hedgehog Signaling Pathways during Carcinogenesis. *Stem Cell Rev*  
868 **3**:30–38. doi:10.1007/s12015-007-0006-6
- 869 Kaucká M, Petersen J, Janovská P, Radaszkiewicz T, Smyèková L, Daulat AM, Borg J-P, Schulte G, Bryja V. 2015. Asymmetry of  
870 VANGL2 in migrating lymphocytes as a tool to monitor activity of the mammalian WNT/planar cell polarity pathway. *Cell*  
871 *Commun Signal* **13**. doi:10.1186/s12964-014-0079-1
- 872 Kazanskaya O, Glinka A, del Barco Barrantes I, Stannek P, Niehrs C, Wu W. 2004. R-Spondin2 is a secreted activator of Wnt/ $\beta$ -  
873 catenin signaling and is required for *Xenopus* myogenesis. *Dev Cell* **7**:525–534. doi:10.1016/j.devcel.2004.07.019
- 874 Kim K-A, Wagle M, Tran K, Zhan X, Dixon MA, Liu S, Gros D, Korver W, Yonkovich S, Tomasevic N, Binnerts M, Abo A. 2008. R-  
875 Spondin Family Members Regulate the Wnt Pathway by a Common Mechanism. *Mol Biol Cell* **19**:2588–2596.  
876 doi:10.1091/mbc.e08-02-0187
- 877 Kim KA, Kakitani M, Zhao J, Oshima T, Tang T, Binnerts M, Liu Y, Boyle B, Park E, Emtage P, Funk WD, Tomizuka K. 2005.  
878 Medicine: Mitogenic influence of human R-spondin1 on the intestinal epithelium. *Science (80- )* **309**:1256–1259.  
879 doi:10.1126/science.1112521

- 880 Kim KA, Zhao J, Andarmani S, Kakitani M, Oshima T, Binnerts ME, Abo A, Tomizuka K, Funk WD. 2006. R-spondin proteins: A  
881 novel link to  $\beta$ -catenin activation. *Cell Cycle* **5**:23–26. doi:10.4161/cc.5.1.2305
- 882 Koo B-K, Spit M, Jordens I, Low TY, Stange DE, van de Wetering M, van Es JH, Mohammed S, Heck AJR, Maurice MM, Clevers H.  
883 2012. Tumour suppressor RNF43 is a stem-cell E3 ligase that induces endocytosis of Wnt receptors. *Nature* **488**:665–669.  
884 doi:10.1038/nature11308
- 885 Kucerova L, Skolekova S, Demkova L, Bohovic R, Matuskova M. 2014. Long-term efficiency of mesenchymal stromal cell-mediated  
886 CD-MSC/5FC therapy in human melanoma xenograft model. *Gene Ther* **21**:874–887. doi:10.1038/gt.2014.66
- 887 Kurayoshi M, Oue N, Yamamoto H, Kishida M, Inoue A, Asahara T, Yasui W, Kikuchi A. 2006. Expression of Wnt-5a Is Correlated  
888 with Aggressiveness of Gastric Cancer by Stimulating Cell Migration and Invasion. *Cancer Res* **66**:10439–10448.  
889 doi:10.1158/0008-5472.CAN-06-2359
- 890 Lai S, Xue B, Yang Y, Zhao L, Chu C, Hao J, Wen C. 2012. Ror2-Src signaling in metastasis of mouse melanoma cells is inhibited  
891 by NRAGE. *Cancer Genet* **205**:552–562. doi:10.1016/J.CANCERGEN.2012.09.002
- 892 Lebensohn AM, Rohatgi R. 2018. R-spondins can potentiate WNT signaling without LGRs. *Elife* **7**:e33126. doi:10.7554/eLife.33126
- 893 Li S, Wang W, Zhang N, Ma T, Zhao C. 2014. IL-1 $\beta$  mediates MCP-1 induction by Wnt5a in gastric cancer cells. *BMC Cancer*  
894 **14**:480. doi:10.1186/1471-2407-14-480
- 895 Lim X, Nusse R. 2013. Wnt signaling in skin development, homeostasis, and disease. *Cold Spring Harb Perspect Biol* **5**:a008029.  
896 doi:10.1101/cshperspect.a008029
- 897 Linnskog R, Mohapatra P, Moradi F, Prasad CP, Andersson T. 2016. Demonstration of a WNT5A-IL-6 positive feedback loop in  
898 melanoma cells: Dual interference of this loop more effectively impairs melanoma cell invasion. *Oncotarget* **7**:37790–37802.  
899 doi:10.18632/oncotarget.9332
- 900 Liu Q, Zhu H, Tiruthani K, Shen L, Chen F, Gao K, Zhang X, Hou L, Wang D, Liu R, Huang L. 2018. Nanoparticle-Mediated  
901 Trapping of Wnt Family Member 5A in Tumor Microenvironments Enhances Immunotherapy for B-Raf Proto-Oncogene  
902 Mutant Melanoma. *ACS Nano* **12**. doi:10.1021/acsnano.7b07384
- 903 Luebker SA, Koepsell SA. 2019. Diverse Mechanisms of BRAF Inhibitor Resistance in Melanoma Identified in Clinical and  
904 Preclinical Studies. *Front Oncol* **9**:268. doi:10.3389/fonc.2019.00268
- 905 Luo C, Balsa E, Perry EA, Liang J, Tavares CD, Vazquez F, Widlund HR, Puigserver P. 2020. H3K27me3-mediated PGC1 $\alpha$  gene  
906 silencing promotes melanoma invasion through WNT5A and YAP. *J Clin Invest*. doi:10.1172/JCI130038
- 907 Makowiecka A, Simiczyjew A, Nowak D, Mazur AJ. 2016. Varying effects of EGF, HGF and TGF $\beta$  on formation of invadopodia and  
908 invasiveness of melanoma cell lines of different origin. *Eur J Histochem* **60**:2728. doi:10.4081/ejh.2016.2728
- 909 Malcikova J, Stano-Kozubik K, Tichy B, Kantorova B, Pavlova S, Tom N, Radova L, Smardova J, Pardy F, Doubek M, Brychtova Y,  
910 Mraz M, Plevova K, Diviskova E, Oltova A, Mayer J, Pospisilova S, Trbusek M. 2015. Detailed analysis of therapy-driven  
911 clonal evolution of TP53 mutations in chronic lymphocytic leukemia. *Leukemia* **29**:877–885. doi:10.1038/leu.2014.297
- 912 Masi I, Caprara V, Bagnato A, Rosanò L. 2020. Tumor Cellular and Microenvironmental Cues Controlling Invadopodia Formation.  
913 *Front Cell Dev Biol*. doi:10.3389/fcell.2020.584181
- 914 Matsumoto A, Shimada Y, Nakano Mae, Oyanagi H, Tajima Y, Nakano Masato, Kameyama H, Hirose Y, Ichikawa H, Nagahashi M,  
915 Nogami H, Maruyama S, Takii Y, Ling Y, Okuda S, Wakai T. 2020. RNF43 mutation is associated with aggressive tumor  
916 biology along with BRAF V600E mutation in right-sided colorectal cancer. *Oncol Rep* **43**:1853. doi:10.3892/or.2020.7561
- 917 Mentink RA, Rella L, Radaszkiewicz TW, Gybel T, Betist MC, Bryja V, Korswagen HC. 2018. The planar cell polarity protein VANG-  
918 1/Vangl negatively regulates Wnt/ $\beta$ -catenin signaling through a Dvl dependent mechanism. *PLoS Genet* **14**:e1007840.  
919 doi:10.1371/journal.pgen.1007840
- 920 Moffat LL, Robinson RE, Bakoulis A, Clark SG. 2014. The conserved transmembrane RING finger protein PLR-1 downregulates

- 921 Wnt signaling by reducing Frizzled, Ror and Ryk cell-surface levels in *C. elegans*. *Development* **141**:617–28.  
922 doi:10.1242/dev.101600
- 923 Mohapatra P, Prasad CP, Andersson T. 2018. Combination therapy targeting the elevated interleukin-6 level reduces invasive  
924 migration of BRAF inhibitor-resistant melanoma cells. *Mol Oncol* **13**:480–494. doi:10.1002/1878-0261.12433
- 925 Nam J-S, Turcotte TJ, Smith PF, Choi S, Yoon JK. 2006. Mouse Crispin/R-spondin Family Proteins Are Novel Ligands for the  
926 Frizzled 8 and LRP6 Receptors and Activate  $\beta$ -Catenin-dependent Gene Expression. *J Biol Chem* **281**:13247–13257.  
927 doi:10.1074/jbc.M508324200
- 928 Nam J-S, Turcotte TJ, Yoon JK. 2007. Dynamic expression of R-spondin family genes in mouse development. *Gene Expr Patterns*  
929 **7**:306–312. doi:10.1016/j.modgep.2006.08.006
- 930 Nam S, Chung J-W, Yang J-Y. 2017. WNT5A Correlates with Clinicopathological Characteristics in Gastric Cancer: a Meta-  
931 Analysis. *Cell Physiol Biochem Int J Exp Cell Physiol Biochem Pharmacol* **41**:33–40. doi:10.1159/000455934
- 932 Nazarian R, Shi H, Wang Q, Kong X, Koya RC, Lee H, Chen Z, Lee MK, Attar N, Sazegar H, Chodon T, Nelson SF, McArthur G,  
933 Sosman JA, Ribas A, Lo RS. 2010. Melanomas acquire resistance to B-RAF(V600E) inhibition by RTK or N-RAS  
934 upregulation. *Nature* **468**:973–977. doi:10.1038/nature09626
- 935 Neumeyer V, Grandl M, Dietl A, Brutau-Abia A, Allgäuer M, Kalali B, Zhang Y, Pan KF, Steiger K, Vieth M, Anton M, Mejías-Luque  
936 R, Gerhard M. 2019a. Loss of endogenous RNF43 function enhances proliferation and tumour growth of intestinal and gastric  
937 cells. *Carcinogenesis* **40**. doi:10.1093/carcin/bgy152
- 938 Neumeyer V, Vieth M, Gerhard M, Mejías-Luque R. 2019b. Mutated Rnf43 aggravates Helicobacter pylori-induced gastric  
939 pathology. *Cancers (Basel)* **11**. doi:10.3390/cancers11030372
- 940 Niu L, Qin H-Z, Xi H-Q, Wei B, Xia S-Y, Chen L. 2015. RNF43 Inhibits Cancer Cell Proliferation and Could be a Potential Prognostic  
941 Factor for Human Gastric Carcinoma. *Cell Physiol Biochem* **36**:1835–1846. doi:10.1159/000430154
- 942 O'Connell MP, Fiori JL, Xu M, Carter AD, Frank BP, Camilli TC, French AD, Dissanayake SK, Indig FE, Bernier M, Taub DD, Hewitt  
943 SM, Weeraratna AT. 2010. The orphan tyrosine kinase receptor, ROR2, mediates Wnt5A signaling in metastatic melanoma.  
944 *Oncogene* **29**:34–44. doi:10.1038/onc.2009.305
- 945 O'Connell MP, French AD, Leotlela PD, Weeraratna AT. 2008. Assaying Wnt5A-Mediated Invasion in Melanoma Cells Methods in  
946 Molecular Biology (Clifton, N.J.). pp. 243–253. doi:10.1007/978-1-59745-249-6\_19
- 947 O'Connell MP, Marchbank K, Webster MR, Valiga AA, Kaur A, Vultur A, Li L, Herlyn M, Villanueva J, Liu Q, Yin X, Widura S, Nelson  
948 J, Ruiz N, Camilli TC, Indig FE, Flaherty KT, Wargo JA, Frederick DT, Cooper ZA, Nair S, Amaravadi RK, Schuchter LM,  
949 Karakousis GC, Xu W, Xu X, Weeraratna AT. 2013. Hypoxia induces phenotypic plasticity and therapy resistance in  
950 melanoma via the tyrosine kinase receptors ROR1 and ROR2. *Cancer Discov* **3**:1378–93. doi:10.1158/2159-8290.CD-13-  
951 0005
- 952 O'Connell MP, Weeraratna AT. 2009. Hear the Wnt Ror: how melanoma cells adjust to changes in Wnt. *Pigment Cell Melanoma*  
953 *Res* **22**:724–739. doi:10.1111/j.1755-148X.2009.00627.x
- 954 Ohkawara B, Glinka A, Niehrs C. 2011. Rspo3 Binds Syndecan 4 and Induces Wnt/PCP Signaling via Clathrin-Mediated  
955 Endocytosis to Promote Morphogenesis. *Dev Cell* **20**:303–314. doi:10.1016/J.DEVCEL.2011.01.006
- 956 Paclíková P, Bernatík O, Radaszkiewicz TW, Bryja V. 2017. The N-terminal part of the Dishevelled DEP domain is required for  
957 Wnt/ $\beta$ -catenin signaling in mammalian cells. *Mol Cell Biol* **37**. doi:10.1128/MCB.00145-17
- 958 Pandur P, Maurus D, Kühl M. 2002. Increasingly complex: New players enter the Wnt signaling network. *BioEssays*.  
959 doi:10.1002/bies.10164
- 960 Peek RMJ, Crabtree JE. 2006. Helicobacter infection and gastric neoplasia. *J Pathol* **208**:233–248. doi:10.1002/path.1868
- 961 Peng WC, de Lau W, Madoori PK, Forneris F, Granneman JCM, Clevers H, Gros P. 2013. Structures of Wnt-Antagonist ZNRF3 and



- 962 Its Complex with R-Spondin 1 and Implications for Signaling. *PLoS One* **8**:e83110. doi:10.1371/journal.pone.0083110
- 963 Perez-Riverol Y, Csordas A, Bai J, Bernal-Llinares M, Hewapathirana S, Kundu DJ, Inuganti A, Griss J, Mayer G, Eisenacher M,  
964 Pérez E, Uszkoreit J, Pfeuffer J, Sachsenberg T, Yilmaz S, Tiwary S, Cox J, Audain E, Walzer M, Jarnuczak AF, Ternent T,  
965 Brazma A, Vizcaíno JA. 2019. The PRIDE database and related tools and resources in 2019: improving support for  
966 quantification data. *Nucleic Acids Res* **47**:D442–D450. doi:10.1093/nar/gky1106
- 967 Planas-Paz L, Orsini V, Boulter L, Calabrese D, Pikiolek M, Nigsch F, Xie Y, Roma G, Donovan A, Mart P, Beckmann N, Dill MT,  
968 Carbone W, Bergling S, Isken A, Mueller M, Kinzel B, Yang Y, Ma X, Nicholson TB, Zamponi R, Capodiec P, Valdez R,  
969 Rivera D, Loew A, Ukomadu C, Terracciano LM, Bouwmeester T, Cong F, Heim MH, Forbes SJ, Runer H, Tchorz JS. 2016.  
970 The RSPO-LGR4/5-ZNRF3/RNF43 module controls liver zonation and size. *Nat Cell Biol* **18**:467–479. doi:10.1038/ncb3337
- 971 Prasad C, Mohapatra P, Andersson T. 2015. Therapy for BRAFi-Resistant Melanomas: Is WNT5A the Answer? *Cancers (Basel)*  
972 **7**:1900–1924. doi:10.3390/cancers7030868
- 973 Radaszkiewicz T, Bryja V. 2020. Protease associated domain of RNF43 is not necessary for the suppression of Wnt/ $\beta$ -catenin  
974 signaling in human cells. *Cell Commun Signal* **18**:91. doi:10.1186/s12964-020-00559-0
- 975 Raiborg C, Grønvd Bache K, Mehlum A, Stang E, Stenmark H. 2001. Hrs recruits clathrin to early endosomes. *EMBO J* **20**:5008–  
976 5021. doi:10.1093/emboj/20.17.5008
- 977 Rape M. 2018. Post-Translational Modifications: Ubiquitylation at the crossroads of development and disease. *Nat Rev Mol Cell*  
978 *Biol.* doi:10.1038/nrm.2017.83
- 979 Raudvere U, Kolberg L, Kuzmin I, Arak T, Adler P, Peterson H, Vilo J. 2019. g:Profiler: a web server for functional enrichment  
980 analysis and conversions of gene lists (2019 update). *Nucleic Acids Res* **47**:W191–W198. doi:10.1093/nar/gkz369
- 981 Rhodes DR, Yu J, Shanker K, Deshpande N, Varambally R, Ghosh D, Barrette T, Pandey A, Chinnaiyan AM. 2004. ONCOMINE: a  
982 cancer microarray database and integrated data-mining platform. *Neoplasia* **6**:1–6.
- 983 Roux KJ, Kim DI, Raida M, Burke B. 2012. A promiscuous biotin ligase fusion protein identifies proximal and interacting proteins in  
984 mammalian cells. *J Cell Biol* **196**:801–10. doi:10.1083/jcb.201112098
- 985 Ryland GL, Hunter SM, Doyle MA, Rowley SM, Christie M, Allan PE, Bowtell DD, Gorringer KL, Campbell IG, Campbell IG. 2013.  
986 *RNF43* is a tumour suppressor gene mutated in mucinous tumours of the ovary. *J Pathol* **229**:469–476.  
987 doi:10.1002/path.4134
- 988 Sadeghi RS, Kulej K, Kathayat RS, Garcia BA, Dickinson BC, Brady DC, Witze ES. 2018. Wnt5a signaling induced phosphorylation  
989 increases APT1 activity and promotes melanoma metastatic behavior. *Elife* **7**:e34362. doi:10.7554/eLife.34362
- 990 Saitoh T, Mine T, Katoh M. 2002. Frequent up-regulation of WNT5A mRNA in primary gastric cancer. *Int J Mol Med* **9**:515–519.  
991 doi:10.3892/ijmm.9.5.515
- 992 Sammar M, Stricker S, Schwabe GC, Sieber C, Hartung A, Hanke M, Oishi I, Pohl J, Minami Y, Sebald W, Mundlos S, Knaus P.  
993 2004. Modulation of GDF5/BRI-b signalling through interaction with the tyrosine kinase receptor Ror2. *Genes to Cells*  
994 **9**:1227–1238. doi:10.1111/j.1365-2443.2004.00799.x
- 995 Sandru A, Voinea S, Panaitescu E, Blidaru A. 2014. Survival rates of patients with metastatic malignant melanoma. *J Med Life*  
996 **7**:572–576.
- 997 Santolini E, Puri C, Salcini AE, Gagliani MC, Pelicci PG, Tacchetti C, Di Fiore PP. 2000. Numb is an endocytic protein. *J Cell Biol*  
998 **151**:1345–1351. doi:10.1083/jcb.151.6.1345
- 999 Schmitt M, Sinnberg T, Nalpas NC, Maass A, Schitteck B, Macek B. 2019. Quantitative proteomics links the intermediate filament  
1000 nestin to resistance to targeted BRAF inhibition in melanoma cells. *Mol Cell Proteomics* mcp.RA119.001302.  
1001 doi:10.1074/mcp.RA119.001302
- 1002 Seet LF, Hong W. 2005. Endofin recruits clathrin to early endosomes via TOM1. *J Cell Sci* **118**:575–587. doi:10.1242/jcs.01628

- 1003 Seo H-S, Habas R, Chang C, Wang J. 2017. Bimodal regulation of Dishevelled function by Vangl2 during morphogenesis. *Hum Mol*  
1004 *Genet* **26**:2053–2061. doi:10.1093/hmg/ddx095
- 1005 Shain AH, Yeh I, Kovalyshyn I, Sriharan A, Talevich E, Gagnon A, Dummer R, North J, Pincus L, Ruben B, Rickaby W, D'Arrigo C,  
1006 Robson A, Bastian BC. 2015. The Genetic Evolution of Melanoma from Precursor Lesions. *N Engl J Med* **373**:1926–1936.  
1007 doi:10.1056/NEJMoa1502583
- 1008 Spit M, Fenderico N, Jordens I, Radaszkiewicz T, Lindeboom RG, Bugter JM, Cristobal A, Ootes L, van Osch M, Janssen E,  
1009 Boonekamp KE, Hanakova K, Potesil D, Zdrahal Z, Boj SF, Medema JP, Bryja V, Koo B, Vermeulen M, Maurice MM. 2020.  
1010 RNF 43 truncations trap CK 1 to drive niche-independent self-renewal in cancer. *EMBO J* **39**:e103932.  
1011 doi:10.15252/embj.2019103932
- 1012 Stejskal K, Potěšil D, Zdrahal Z. 2013. Suppression of peptide sample losses in autosampler vials. *J Proteome Res* **12**:3057–3062.  
1013 doi:10.1021/pr400183v
- 1014 Su Y, Ko ME, Cheng H, Zhu R, Xue M, Wang J, Lee JW, Frankiw L, Xu A, Wong S, Robert L, Takata K, Yuan D, Lu Y, Huang S,  
1015 Ribas A, Levine R, Nolan GP, Wei W, Plevritis SK, Li G, Baltimore D, Heath JR. 2020. Multi-omic single-cell snapshots reveal  
1016 multiple independent trajectories to drug tolerance in a melanoma cell line. *Nat Commun* **11**:2345. doi:10.1038/s41467-020-  
1017 15956-9
- 1018 Su Y, Wei W, Robert L, Xue M, Tsoi J, Garcia-Diaz A, Homet Moreno B, Kim J, Ng RH, Lee JW, Koya RC, Comin-Anduix B,  
1019 Graeber TG, Ribas A, Heath JR. 2017. Single-cell analysis resolves the cell state transition and signaling dynamics  
1020 associated with melanoma drug-induced resistance. *Proc Natl Acad Sci U S A* **114**:13679–13684.  
1021 doi:10.1073/pnas.1712064115
- 1022 Szenker-Ravi E, Altunoglu U, Leushacke M, Bosso-Lefèvre C, Khatoo M, Thi Tran H, Naert T, Noelanders R, Hajamohideen A,  
1023 Beneteau C, de Sousa SB, Karaman B, Latypova X, Başaran S, Yücel EB, Tan TT, Vlamincx L, Nayak SS, Shukla A, Girisha  
1024 KM, Le Caignec C, Soshnikova N, Uyguner ZO, Vleminckx K, Barker N, Kayserili H, Reversade B. 2018. RSPO2 inhibition of  
1025 RNF43 and ZNRF3 governs limb development independently of LGR4/5/6. *Nature* **557**:564–569. doi:10.1038/s41586-018-  
1026 0118-y
- 1027 Talantov D, Mazumder A, Yu JX, Briggs T, Jiang Y, Backus J, Atkins D, Wang Y. 2005. Novel Genes Associated with Malignant  
1028 Melanoma but not Benign Melanocytic Lesions. *Clin Cancer Res* **11**:7234–7242. doi:10.1158/1078-0432.CCR-05-0683
- 1029 Talebi A, Dehairs J, Rambow F, Rogiers A, Nittner D, Derua R, Vanderhoydonc F, Duarte JAG, Bosisio F, Van den Eynde K, Nys K,  
1030 Pérez MV, Agostinis P, Waelkens E, Van den Oord J, Fendt S-M, Marine J-C, Swinnen J V. 2018. Sustained SREBP-1-  
1031 dependent lipogenesis as a key mediator of resistance to BRAF-targeted therapy. *Nat Commun* **9**:2500. doi:10.1038/s41467-  
1032 018-04664-0
- 1033 Tauriello DVF, Haegerbarth A, Kuper I, Edelmann MJ, Henraat M, Canninga-van Dijk MR, Kessler BM, Clevers H, Maurice MM.  
1034 2010. Loss of the Tumor Suppressor CYLD Enhances Wnt/β-Catenin Signaling through K63-Linked Ubiquitination of Dvl. *Mol*  
1035 *Cell* **37**:607–619. doi:10.1016/J.MOLCEL.2010.01.035
- 1036 Tebar F, Bohlander SK, Sorkin A. 1999. Clathrin assembly lymphoid myeloid leukemia (CALM) protein: Localization in endocytic-  
1037 coated pits, interactions with clathrin, and the impact of overexpression on clathrin-mediated traffic. *Mol Biol Cell* **10**:2687–  
1038 2702. doi:10.1091/mbc.10.8.2687
- 1039 Tirosh I, Izar B, Prakadan SM, Wadsworth MH, Treacy D, Trombetta JJ, Rotem A, Rodman C, Lian C, Murphy G, Fallahi-Sichani M,  
1040 Dutton-Regester K, Lin JR, Cohen O, Shah P, Lu D, Genshaft AS, Hughes TK, Ziegler CGK, Kazer SW, Gaillard A, Kolb KE,  
1041 Villani AC, Johannessen CM, Andreev AY, Van Allen EM, Bertagnolli M, Sorger PK, Sullivan RJ, Flaherty KT, Frederick DT,  
1042 Jané-Valbuena J, Yoon CH, Rozenblatt-Rosen O, Shalek AK, Regev A, Garraway LA. 2016. Dissecting the multicellular  
1043 ecosystem of metastatic melanoma by single-cell RNA-seq. *Science (80- )* **352**:189–196. doi:10.1126/science.aad0501
- 1044 Tiwary S, Xu L. 2016. FRIZZLED7 Is Required for Tumor Initiation and Metastatic Growth of Melanoma Cells. *PLoS One*

- 1045 11:e0147638. doi:10.1371/journal.pone.0147638
- 1046 Tsukiyama T, Fukui A, Terai S, Fujioka Y, Shinada K, Takahashi H, Yamaguchi TP, Ohba Y, Hatakeyama S. 2015. Molecular Role  
1047 of RNF43 in Canonical and Noncanonical Wnt Signaling. *Mol Cell Biol* **35**:2007–2023. doi:10.1128/MCB.00159-15
- 1048 Tsukiyama T, Zou J, Kim J, Ogamino S, Shino Y, Masuda T, Merenda A, Matsumoto M, Fujioka Y, Hirose T, Terai S, Takahashi H,  
1049 Ishitani T, Nakayama KI, Ohba Y, Koo B-K, Hatakeyama S. 2020. A phospho-switch controls RNF43-mediated degradation  
1050 of Wnt receptors to suppress tumorigenesis. *Nat Commun* **11**:4586. doi:10.1038/s41467-020-18257-3
- 1051 van Kappel EC, Maurice MM. 2017. Molecular regulation and pharmacological targeting of the  $\beta$ -catenin destruction complex. *Br J*  
1052 *Pharmacol*. doi:10.1111/bph.13922
- 1053 VanderVorst K, Dreyer CA, Konopelski SE, Lee H, Ho H-YH, Carraway KL. 2019. Wnt/PCP Signaling Contribution to Carcinoma  
1054 Collective Cell Migration and Metastasis. *Cancer Res* **79**:1719–1729. doi:10.1158/0008-5472.CAN-18-2757
- 1055 VanderVorst K, Hatakeyama J, Berg A, Lee H, Carraway KL. n.d. Cellular and molecular mechanisms underlying planar cell polarity  
1056 pathway contributions to cancer malignancy. *Semin Cell Dev Biol* **81**:78–87.
- 1057 Wan PTC, Garnett MJ, Roe SM, Lee S, Niculescu-Duvaz D, Good VM, Project CG, Jones CM, Marshall CJ, Springer CJ, Barford D,  
1058 Marais R. 2004. Mechanism of activation of the RAF-ERK signaling pathway by oncogenic mutations of B-RAF. *Cell*  
1059 **116**:855–867. doi:10.1016/S0092-8674(04)00215-6
- 1060 Webster MR, Xu M, Kinzler KA, Kaur A, Appleton J, O'Connell MP, Marchbank K, Valiga A, Dang VM, Perego M, Zhang G,  
1061 Slipicevic A, Keeney F, Lehrmann E, Wood W, Becker KG, Kossenkov A V., Frederick DT, Flaherty KT, Xu X, Herlyn M,  
1062 Murphy ME, Weeraratna AT. 2015. Wnt5A promotes an adaptive, senescent-like stress response, while continuing to drive  
1063 invasion in melanoma cells **28**:184–195. doi:10.1111/pcmr.12330
- 1064 Weeraratna AT, Jiang Y, Hostetter G, Rosenblatt K, Duray P, Bittner M, Trent JM. 2002. Wnt5a signaling directly affects cell motility  
1065 and invasion of metastatic melanoma. *Cancer Cell* **1**:279–88. doi:10.1016/S1535-6108(02)00045-4
- 1066 Wiese KE, Nusse R, Amerongen Renée van, van Amerongen Reneé. 2018. Wnt signalling: conquering complexity. *Development*  
1067 **145**:dev165902. doi:10.1242/dev.165902
- 1068 Witte F, Bernatik O, Kirchner K, Masek J, Mahl A, Krejci P, Mundlos S, Schambony A, Bryja V, Stricker S. 2010. Negative  
1069 regulation of Wnt signaling mediated by CK1-phosphorylated Dishevelled via Ror2. *FASEB J* **24**:2417–2426.  
1070 doi:10.1096/fj.09-150615
- 1071 Xie Y, Zamponi R, Charlat O, Ramones M, Swalley S, Jiang X, Rivera D, Tschantz W, Lu B, Quinn L, Dimitri C, Parker J, Jeffery D,  
1072 Wilcox SK, Watrobka M, Lemotte P, Granda B, Porter JA, Myer VE, Loew A, Cong F. 2013. Interaction with both ZNRF3 and  
1073 LGR4 is required for the signalling activity of R-spondin. *EMBO Rep* **14**:1120–1126. doi:10.1038/embor.2013.167
- 1074 Xu L, Shen SS, Hoshida Y, Subramanian A, Ross K, Brunet J-P, Wagner SN, Ramaswamy S, Mesirov JP, Hynes RO. 2008. Gene  
1075 Expression Changes in an Animal Melanoma Model Correlate with Aggressiveness of Human Melanoma Metastases. *Mol*  
1076 *Cancer Res* **6**. doi:10.1158/1541-7786.MCR-07-0344
- 1077 Yan HHN, Lai JCW, Ho SL, Leung WK, Law WL, Lee JFY, Chan AKW, Tsui WY, Chan ASY, Lee BCH, Yue SSK, Man AHY,  
1078 Clevers H, Yuen ST, Leung SY. 2017. RNF43 germline and somatic mutation in serrated neoplasia pathway and its  
1079 association with BRAF mutation. *Gut* **66**:1645–1656. doi:10.1136/gutjnl-2016-311849
- 1080 Yang W, Garrett L, Feng D, Elliott G, Liu X, Wang N, Wong YM, Choi NT, Yang Y, Gao B. 2017. Wnt-induced Vangl2  
1081 phosphorylation is dose-dependently required for planar cell polarity in mammalian development. *Cell Res* **27**:1466–1484.  
1082 doi:10.1038/cr.2017.127
- 1083 Zebisch M, Jones EY. 2015. ZNRF3/RNF43 – A direct linkage of extracellular recognition and E3 ligase activity to modulate cell  
1084 surface signalling. *Prog Biophys Mol Biol* **118**:112–118. doi:10.1016/J.PBIOMOLBIO.2015.04.006
- 1085 Zebisch M, Xu Y, Krastev C, MacDonald BT, Chen M, Gilbert RJC, He X, Jones EY. 2013. Structural and molecular basis of

1086 ZNRF3/RNF43 transmembrane ubiquitin ligase inhibition by the Wnt agonist R-spondin. *Nat Commun* 4:2787.  
1087 doi:10.1038/ncomms3787

1088

1089 **Figures, supplements, data sources and tables list**

1090 Figure 1. RNF43 interactome is enriched with the Wnt Planar Cell Polarity pathway

1091 Figure 1 Supplementary table 1 - BioID - RNF43 interactors

1092 Figure 1 Supplementary table 2 - gProfiler GO terms analysis

1093 Figure 2. RNF43 interacts with WntPCP components.

1094 Figure 2 Source Data

1095 Figure 2 figure supplement 1.

1096 Figure 2 figure supplement 1 Source Data

1097 Figure 3. Mechanism of Wnt PCP inhibition by RNF43

1098 Figure 3 Source Data

1099 Figure 3 figure supplement 1.

1100 Figure 3 figure supplement 1 Source Data

1101 Figure 3 figure supplement 2.

1102 Figure 4. RNF43 in melanoma.

1103 Figure 4 Source data

1104 Figure 4 figure supplement 1.

1105 Figure 4 figure supplement 1 Source data

1106 Figure 4 figure supplement 2.

1107 Figure 4 figure supplement 2 Source Data

1108 Figure 5. RNF43 inhibits WNT5A dependent invasive properties of human melanoma.

1109 Figure 5 Source data

1110 Figure 5 figure supplement 1.

1111 Figure 5 figure supplement 2.

1112 Figure 5 figure supplement 3.

1113 Figure 5 figure supplement 4.

1114 Figure 6. RNF43 overexpressing melanoma cells fail to develop resistance to bRAF inhibition.

1115 Figure 6 Source Data

1116

1117 Table 1 – Cloning and mutagenesis primers

1118 Table 2 – Antibodies

1119 Table 3 – qPCR primers

1120 Supplementary Table 1- Sequencing of the CRISPRCas9 derived cell lines

## 1121 **Figure legends**

### 1122 **Figure 1. RNF43 interactome is enriched with the Wnt Planar Cell Polarity pathway components**

1123 **A.** Western blot analysis of T-REx 293 WNT5A KO and parental cells. Phosphorylation dependent shifts of  
1124 endogenous ROR1, DVL2 and DVL3 were suppressed upon WNT5A loss. Signal of  $\beta$ -actin serves as a  
1125 loading control **B.** Western blot showing activation of the noncanonical Wnt pathway components: ROR1,  
1126 DVL2 and DVL3 (arrowheads) upon rhRSPO1 overnight treatment. Tetracycline forced RNF43  
1127 overexpression (as visualized by HA tag specific antibody) suppressed this effect. Inhibition of Wnt ligands  
1128 secretion by the porcupine inhibitor Wnt-C59 shows dependency of the rhRSPO1 mediated effect on  
1129 endogenous Wnt ligands; representative blots from N=3. **C.** Western blot analysis of cellular responses to  
1130 the increasing doses of rhWNT5A. ROR1 shift and phosphorylation of DVL2 and DVL3 (arrowheads) were  
1131 inhibited upon tetracycline induced RNF43-HA-BirA\* overexpression. All samples were treated with Wnt-  
1132 C59 to ascertain assay specificity to the exogenous rhWNT5A, N=3. **D.** Volcano plot of the RNF43  
1133 interactome identified by BioID and subsequent mass spectrometric detection (see M&M for details).  
1134 Significantly enriched proteins annotated as the components of the noncanonical Wnt signaling pathway  
1135 are highlighted. Full list of BioID-based identified interactors of RNF43 is present in the Figure 1  
1136 Supplementary table 1 and GO terms enrichment analysis in the Figure 1 Supplementary table 2.

1137

### 1138 **Figure 2. RNF43 interacts with Wnt/PCP components**

1139 **A.** RNF43 interacts with VANGL2, but not with its mutants lacking N- or C-termini. VANGL2-EGFP and its  
1140 variants (schematized) were overexpressed with RNF43-HA in Hek293 T-REx cells, immunoprecipitated  
1141 by anti-HA and anti-GFP antibodies and analyzed by Western blotting. Representative experiment from  
1142 N=3. Scheme illustrates secondary structure of the wild type VANGL2 protein and its shortened variants  
1143 used in this study. **B.**, **B'**. RNF43 (anti-HA, red) colocalized with transiently expressed VANGL2 (GFP,  
1144 green). Co-localization was analyzed utilizing histograms of red, green and blue channels signals along  
1145 selection (yellow line) (**B'**). TO-PRO-3 Iodide was used to stain nuclei (blue). Scale bar: 25  $\mu$ m. **C.** RNF43  
1146 binds to the ROR1 and deletion of the intracellular part of ROR1 disrupts this interaction. RNF43-HA was  
1147 detected in the ROR1 pull down prepared from lysates of Hek293 T-REx cells overexpressing RNF43-HA  
1148 and ROR1-V5, N=3. ROR1 wild type and truncated mutants are represented in the scheme. **D.**, **D'**. RNF43  
1149 (anti-HA, red) colocalized with transiently expressed ROR1-V5 (anti-V5, green). Signals along selection  
1150 (yellow line) were analyzed (**D'**). TO-PRO-3 was employed nuclei staining (blue). Scale bar:25  $\mu$ m. RNF43  
1151 interactions with VANGL1 and ROR2 are studied in the Figure 2 figure supplement 1. Figure 2 Source Data  
1152 contains raw data used in the **B'** and **D'**.

### 1153 **Figure 2 figure supplement 1. RNF43 interacts with Wnt/PCP components**

1154 **A.** RNF43 interacts with VANGL1. VANGL1-Myc was co-immunoprecipitated in the HA pull-down, prepared  
1155 from lysate of Hek293 T-REx cells transiently overexpressing RNF43-HA and VANGL1-Myc, but not from  
1156 the lysate containing only VANGL1-Myc overexpressed transgene, N=3. **B.** RNF43 interacts with the ROR2  
1157 in the CRD domain dispensable manner. Wild type ROR2 and  $\Delta$ CRD-ROR2 mutant were detected in HA  
1158 and FLAG pull downs, prepared from lysates of the Hek293 T-REx cells transiently overexpressing RNF43-  
1159 HA and ROR2-FLAG or  $\Delta$ CRD-ROR2, N=3. **C.**, **C'**. Exogenous ROR2 (antiFLAG, green) colocalizes with  
1160 the RNF43-BirA\*-HA (anti-HA, red) in the TetON Hek293 T-Rex cells. DNA was visualized by TO-PRO-3  
1161 Iodide. Scale bar represents 25  $\mu$ m. Co-localization of ROR2 and RNF43 was analyzed utilizing histograms  
1162 (**C'**) of red, green and blue channels along selection (yellow line). Data is present in the Figure 2 figure  
1163 supplement 1 Source Data. **D.** RNF43 interacts with the VANGL2 in the absence of all three Disheveled  
1164 isoforms. RNF43 binding to VANGL2 in the DVL1/2/3 deficient cells was confirmed in the two-directional  
1165 co-IP assay, N=3. **E.** Interaction between ROR1-V5 and RNF43-HA is preserved in the DVL1-3 null cells.  
1166 ROR1 was detected in the HA pull-down and RNF43 in the V5 immunoprecipitation. T-REx DVL1/2/3 tKO  
1167 cells were transfected with highlighted plasmids, N=3.

### 1168 **Figure 3. Mechanism of Wnt/PCP inhibition by RNF43**

1169 **A.** Hek293 T-REx cells were transfected with plasmid encoding His-tagged ubiquitin, VANGL2-GFP and  
1170 HA-tagged wild type or Mut1 RNF43 constructs. Ubiquitinated proteins were enriched by His pull down  
1171 and analyzed by Western blotting. VANGL2 is ubiquitinated by the E3 ubiquitin ligase RNF43, but not by  
1172 its enzymatically inactive variant (RNF43Mut1). Representative experiment from N=3. RNF43-mediated  
1173 ubiquitination of DVL1 and DVL2 together in the Figure 3 figure supplement 1. **B.** Tetracycline-induced  
1174 overexpression of the wt RNF43 (HA), but not enzymatically inactive RNF43Mut1 (HA), decreased VANGL2

1175 protein level and suppressed phosphorylation of ROR1 and DVL3 (open arrowheads). CRISPR/Cas9  
1176 derived RNF43/ZNRF3 (R/Z) dKO cell lines #1 and #2 displayed phenotype reversed to the RNF43  
1177 overexpression. Quantified in RNF43-mediated ubiquitination of DVL1 and DVL2 together in the Figure 3  
1178 figure supplement 1B, N=3. **C.** Inhibition of the proteasomal degradation pathway by MG132 (but not by  
1179 lysosomal inhibitor chloroquine) blocked the RNF43 effects on ROR1, DVL2, DVL3 and VANGL2 as shown  
1180 by the Western blotting analysis, N=3. **D.** Flow cytometric analysis of surface ROR1 in wild type (WT) and  
1181 RNF43/ZNRF3 (R/Z) dKO cells; unpaired two-tailed t-test:  $p=0.0298$ , N=4. ROR1 was stained using ROR1-  
1182 APC conjugate on the not permeabilized cells. Validation of the  $\alpha$ -ROR1-APC antibody is shown in the  
1183 Figure 3 figure supplement 1D. **E., E'.** Surface ROR1 levels upon 3h and overnight (ON) induction of RNF43  
1184 in RNF43 TetON RNF43/ZNRF3 dKO cells; unpaired t-test  $p<0.0001$ , N=6. Representative histogram of  
1185 ROR1-APC signal in the analyzed conditions is shown (E'). **F.** Dansylcadaverine, inhibitor of clathrin-  
1186 mediated endocytosis, blocked the effect of RNF43 overexpression on surface ROR1, performed as in E;  
1187 N=5. **G.** Immunofluorescence imaging showed enhanced ROR1(V5) colocalization with the marker of early  
1188 endosomes RAB5 (GFP) after 3h tetracycline treatment in RNF43 TetON RNF43/ZNRF3 dKO cells.  
1189 (bottom) RAB11 positive (GFP) recycling endosomes were recruited to the ROR1 (V5) at the plasma  
1190 membrane after overnight tetracycline treatment. Cells were transfected, treated, fixed and stained. DNA  
1191 was visualized by Hoechst 33342. Similar results were obtained for T-REx RNF43 TetON cell line (Figure  
1192 3 figure supplement 1E-G).

1193 Raw data used in the D, E and F are enclosed in the Figure 3 Source Data.

#### 1194 **Figure 3 figure supplement 1. Mechanism of Wnt PCP inhibition by RNF43**

1195 **A.** DVL1 and DVL2 are ubiquitinated by the E3 ubiquitin ligase RNF43, but not by its enzymatically inactive  
1196 mutant (RNF43Mut1). Hek293 T-REx cells were transfected with plasmid encoding His-tagged ubiquitin,  
1197 DVL1-FLAG or DVL2-FLAG and wild type or Mut1 RNF43 constructs and subjected to His-tag pull down  
1198 and subsequent Western blotting. N=3. **B.** Quantification of Western blots from Fig. 3B. unpaired two-tailed  
1199 t-test, \* $p<0.05$ ; \*\* $p<0.01$ , \*\*\* $p<0.001$ , N=3. **C.** Western blotting showing the lack of ROR1 protein in the T-  
1200 REX 293 ROR1 KO cell lines. **D.** T-REx ROR1 KO line was used for validation of the ROR1-APC antibody  
1201 used for the flow cytometric determination of the ROR1 cell surface level. **E., E'** Analysis of cell surface  
1202 ROR1 in the T-REx RNF43 TetON cell line. ROR1 was internalized in the HA-positive (RNF43) cells  
1203 population upon 3 hours tetracycline treatment,  $p=0.0486$ , N=3. ROR1-APC flow cytometry histogram is  
1204 shown (E'). **F.** Dansylcadaverine blocked RNF43-mediated effect on the ROR1 cell surface effect in the T-  
1205 REX 293 RNF43 TetON cells, N=3. **G.** Immunofluorescence imaging of enhanced ROR1 (anti-V5, magenta)  
1206 colocalization with marker of early endosomes RAB5 (GFP, green) after 3 hours of tetracycline treatment  
1207 in the T-REx RNF43 TetON cell line. RAB11 (GFP, green) was recruited to the ROR1 at plasma membrane  
1208 upon overnight tetracycline exposition. DNA was visualized by Hoechst 33342 (blue). Scale bars represent  
1209 10  $\mu\text{m}$ . Cells were treated 24h post-transfection for indicated time points. Images representing RAB5 control

1210 and 3 h tetracycline treatment together with RAB11 control and tetracycline 3h conditions are presented in  
1211 the Figure 3 figure supplement 2.

1212 Data presented in the B, E and F is presented in the Figure 3 figure supplement Source Data file.

### 1213 **Figure 3 figure supplement 2. Mechanism of Wnt PCP inhibition by RNF43**

1214 **A., B.**, Confocal imaging of the inducible T-REx RNF43/ZNRF3 dKO (A) and T-REx WT RNF43 TetON (B)  
1215 and transfected with plasmids encoding ROR1-V5 (anti-V5, magenta) and RAB11-GFP-HA (GFP, green).  
1216 24 hours post transfection, cells were treated with tetracycline for indicated time and then PFA fixed,  
1217 permeabilized and stained for ROR1 (V5) and nuclei (DAPI, blue) detection. Scale bars represent 10  $\mu$ m.  
1218 Other tetracycline time points are presented in the Figure 3 and Figure 3 figure supplement 1.

### 1219 **Figure 4. RNF43 in melanoma**

1220 **A., B.** *RNF43* expression is lower in melanoma when compared with the skin and benign melanocytic skin  
1221 nevus (A) and in the case of distant metastasis compared to the primary tumors (B), unpaired two-tailed t-  
1222 test: \*\*\*\*  $p < 0.0001$ . **C.** *RNF43* expression is negative prognostic factor in melanoma. *RNF43* low patients  
1223 have shorter overall survival (Logrank p-value=0.0311). On contrary, patients with low expression of *RNF43*  
1224 substrate *VANGL1* (**D.**) had longer survival (Logrank test, p-value = 0.00518). Expression of *DVL3*,  
1225 *VANGL1* and *ZNRF3* was analysed in the Figure 4 supplement 1A-D. **E.** Culture media from melanoma  
1226 A375 WT and A375 IV cell lines were collected after 48 h and analyzed by Western blotting for presence  
1227 of *WNT5A*. Densitometric analysis was done using the imageJ software. Equal number of cells was used.  
1228 **F.** Schematic representation of genetic modification of A375 WT and A375 IV cells to stably overexpress  
1229 exogenous *RNF43* (+*RNF43*, grey) and to knockout *RNF43/ZNRF3* (R/Z dKO, dark grey) by CRISPR/Cas9  
1230 mediated gene editing. **G.** Effects of the *RNF43* overexpression and *RNF43/ZNRF3* knockout in A375 WT  
1231 and in its invasive derivative A375 IV. Exogenous *RNF43* expression blocked *DVL2* and *DVL3* activation  
1232 (arrowheads). Removal of endogenous *RNF43* and *ZNRF3* proteins presence had an opposite effect, N=6.  
1233 Quantification is in the Figure 4 figure supplement 1E, F. Expression of the *WNT5A*, *RNF43*, *ZNRF3*, *DVL2*  
1234 and *DVL3* in tested cell lines was checked and shown is in the Figure 4 figure supplement 2. **H. I.** Western  
1235 blot showing *DVL2* and *DVL3* phosphorylation (arrowheads) in response to the 40 and 80 ng/ml 3h-long  
1236 rh*WNT5A* treatments in A375 WT (H) and A375 IV (I) derived cell lines.  $\beta$ -ACTIN served as a loading  
1237 control. LGK-974 was used to block endogenous Wnt ligands secretion and *RNF43* was probed by HA  
1238 antibody, N=3.

### 1239 **Figure 4 figure supplement 1. RNF43 in melanoma**

1240 **A.** *DVL3* expression level is elevated in human melanoma, unpaired two-tailed t-test, \* $p = 0,0159$ ,  
1241 \*\*\*\* $p < 0.0001$ . **B.** High expression of *DVL3* is a negative prognostic factor (50% lower and 50% upper  
1242 percentiles). Logrank p-value=0.0269 **C.** *VANGL1* is more expressed in the metastasis than in primary  
1243 melanoma, unpaired two-tailed t-test,  $p = 0.0241$ . **D.** *ZNRF3* gene expression has no impact on melanoma



1244 patients survival. **E., F.** Quantification of Western blots presented in the Fig. 4G. Exogenous RNF43  
1245 expression blocked in both tested cell lines DVL2 (E) DVL3 (F) phosphorylation dependent shifts.  
1246 CRISPR/Cas9 mediated knock-out of *RNF43/ZNRF3* resulted in the more activated DVL2 and DVL3  
1247 isoforms in case A375 IV cell line. Data were normalized to 1 for the parental cell lines values, unpaired  
1248 two-tailed t-test: \*p < 0.05, \*\*p < 0.01, \*\*\*\*p < 0.0001, N=6 (F – A375 IV R/Z dKO N=5). Total DVL2 and  
1249 DVL3 protein levels accompanied by *WNT5A*, *RNF43*, *ZNRF3*, *DVL2* and *DVL3* genes expression analysis  
1250 is present in the Figure 4 figure supplement 2. Data used in the A, C, E and F is shown in the Figure 4  
1251 figure supplement 1 Source data.

#### 1252 **Figure 4 figure supplement 2. RNF43 in melanoma**

1253 **A., B., C.** RT-qPCR results – expression of the *WNT5A* (A), *RNF43* (B) and *ZNRF3* (C) genes was analyzed  
1254 in the tested melanoma cells and presented as  $2^{-\Delta\Delta Ct} \pm SD$ , two tailed t-test: \*p < 0.05, N=3 (A375 WT N=2  
1255 for A and B). Relative expression level was normalized to the *B2M* and *GAPDH* genes expression **D., E.**  
1256 Western blot quantification results (Fig. 4G.) showing not affected by RNF43 overexpression or  
1257 *RNF43/ZNRF3* knockout total level of DVL2 (D) and DVL3 (F). DVL3 protein level decreased only in the  
1258 case of A375 WT R/Z dKO (D), unpaired two-tailed t-test: \*\*\*p < 0.001, N=3. Results were normalized to  
1259 the A375 WT values. **E., G.** RT-qPCR analysis of *DVL2* (E) and *DVL3* (G) genes expression in A375 WT,  
1260 A375 IV cell lines and their derivatives. Relative expression level was normalized to the *B2M* and *GAPDH*  
1261 genes expression values and presented as  $2^{-\Delta\Delta Ct} \pm SD$ . Data used in the A – G is present in the Figure 4  
1262 figure supplement 2 Source Data.

#### 1263 **Figure 5. RNF43 inhibits WNT5A dependent invasive properties of human melanoma**

1264 **A.** RNF43 reduced melanoma cells migration in the wound healing assay. Wound width was tested at 24 h  
1265 and 48 h after scratch, results were normalized to 1, as the scratch size at the experimental initial point.  
1266 Cells proliferation was suppressed by serum starvation, unpaired two-tailed t-test: \*p < 0.05, \*\*p < 0.01,  
1267 N=4. Representative photos at the end of the experiment are shown. **B.** Matrigel invasion assay – stable  
1268 RNF43 overexpression inhibited invasive properties of the A375 WT and A375 IV. Serum starved cells were  
1269 plated onto Matrigel coated porous membrane. Medium containing 20% of serum was used as  
1270 chemoattractant. After 18 h of incubation cells were fixed in methanol, noninvaded ones were removed  
1271 from the upper part of transwell insert by cotton swab. Results were normalized to 1 for the number of  
1272 invaded A375 WT cells, unpaired two-tailed t-test: \*p < 0.05, N=4. Representative photos are shown in the  
1273 Figure 5 figure supplement 1. **C.** Quantification of the invadopodia formed by melanoma cells. RNF43  
1274 overexpression in the A375 WT and A375 IV decreased number of invadopodia, based on the analysis of  
1275 confocal images. Number of cortactin/F-actin double positive puncta in the individual cells was calculated  
1276 in the imageJ software, unpaired two-tailed t-test: \*\*\*\*p<0.0001. Examples of confocal imaging are shown:  
1277 green – phalloidin, red – cortactin, blue – DNA. See Figure 5 figure supplement 2 for images from all  
1278 experimental conditions. **D.** Gelatin degradation assay- both A375 WT and A375 IV RNF43-overexpressing  
1279 cell lines showed decreased capacity to locally degrade the extracellular matrix modification. Serum starved

1280 cells were plated onto gelatin-Oregon Green coated coverslips and incubated for 24 hours. Images obtained  
1281 by Leica SP8 confocal microscope were analyzed for the presence of gelatin degradation by individual cells  
1282 using imageJ software, unpaired two-tailed t-test: \*p < 0.05, \*\*p < 0.01, N=3. Example of gelatin degradation  
1283 is shown, more pictures are present in the Figure 5 figure supplement 3 and 4.

1284 Data used in the A – B is present in the Figure 5 Data Source file.

1285 **Figure 5 figure supplement 1. RNF43 inhibits Wnt5a dependent invasive properties of human**  
1286 **melanoma**

1287 Representative photos of Matrigel invasion assay after crystal violet staining. Results are present in the  
1288 Fig.5C.

1289 **Figure 5 figure supplement 2. RNF43 inhibits Wnt5a dependent invasive properties of human**  
1290 **melanoma**

1291 Confocal imaging of the A375 WT, A375 IV and RNF43 overexpressing and *RNF43/ZNRF3* double knock-  
1292 out cell lines modifications. Cells were PFA fixed, Triton X-100 permeabilized and stained for cortactin by  
1293 antibody (secondary antibody Alexa 568, red) F-actin using fluorescent phalloidin conjugate (Alexa 488,  
1294 green) and TO-PRO-3 Iodide for DNA visualization (blue). Number of double positive puncta in single cells  
1295 were quantified using imageJ software. Scale bars represent 100  $\mu$ m. Results are present in the Fig.5D.

1296 **Figure 5 figure supplement 3. RNF43 inhibits Wnt5a dependent invasive properties of human**  
1297 **melanoma**

1298 Confocal imaging of gelatin degradation assay without (Figure 5 figure supplement 3) and after (Figure 5  
1299 figure supplement 4) rhWNT5A treatment. Serum starved cells were plated onto gelatin-Oregon Green  
1300 (green) coated coverslips and incubated for 24 hours. Fixed cells were stained with phalloidin-Alexa 594 for  
1301 F-actin visualization (red) and TO-PRO-3 Iodide for nuclei (blue). Foci showing gelatin degradation are  
1302 marked. Scale bars represent 50  $\mu$ m. Experiment was repeated three times. Results are present in the  
1303 Fig.5D.

1304 **Figure 5 figure supplement 4. RNF43 inhibits Wnt5a dependent invasive properties of human**  
1305 **melanoma**

1306 Confocal imaging of gelatin degradation assay without (Figure 5 figure supplement 3) and after (Figure 5  
1307 figure supplement 4) rhWNT5A treatment. Serum starved cells were plated onto gelatin-Oregon Green  
1308 (green) coated coverslips and incubated for 24 hours. Fixed cells were stained with phalloidin-Alexa 594 for  
1309 F-actin visualization (red) and TO-PRO-3 Iodide for nuclei (blue). Foci showing gelatin degradation are  
1310 marked. Scale bars represent 50  $\mu$ m. Experiment was repeated three times. Results are present in the  
1311 Fig.5D.

1312

1313 **Figure 6. RNF43 overexpressing melanoma cells do not develop resistance to BRAF inhibition**

1314 **A.** Scheme showing the experimental model used for the analysis of vemurafenib resistance acquisition.  
1315 Melanoma cells are exposed to the increasing doses of the *BRAF* V600E inhibitor Vemurafenib and  
1316 following initial decrease in cell numbers recover and obtain capacity to grow in the presence of  
1317 Vemurafenib. **B., C., D.** Western blot analysis of the cellular responses to the acute Vemurafenib treatment  
1318 (0.5  $\mu$ M, 24 hours) in comparison to the signaling in Vemurafenib-resistant (VR) cells growing in presence  
1319 of 2  $\mu$ M Vemurafenib. In VR cells ERK1/2 is constitutively phosphorylated even in the Vemurafenib  
1320 presence.  $\beta$ -ACTIN served as a loading control. A375 WT VR cells showed increased activation of DVL2  
1321 and DVL3 (arrowheads: DVL2, DVL3, quantifications in C and D) and higher expression of ROR1. Unpaired  
1322 two-tailed t-test: \* $p < 0.05$ , \*\* $p < 0.01$ ,  $N=3$ . **E.** Melanoma cell lines A375 WT and A375 IV overexpressing  
1323 RNF43 showed decreased ability to grow and form colonies when seeded in the low density. Colonies were  
1324 fixed and stained with crystal violet after seven days. Paired (Vemurafenib – vs +) and unpaired (WT vs IV)  
1325 two-tailed t-tests: \* $p < 0.05$ , \*\*\*\* $p < 0.0001$ ,  $N \geq 5$ . **F.** RNF43 overexpressing A375 WT and A375 IV did not  
1326 develop resistance to the BRAF V600E inhibition by vemurafenib treatment. Cells were cultured for  
1327 approximately two months in the presence of increasing doses of the inhibitor. Photos show crystal violet  
1328 stained cultures at the end of the selection process. Data used in the C, D and E is shown in the Figure 6  
1329 Source data file.

1330

## Figure 1. RNF43 interactome is enriched with the Wnt Planar Cell Polarity pathway components

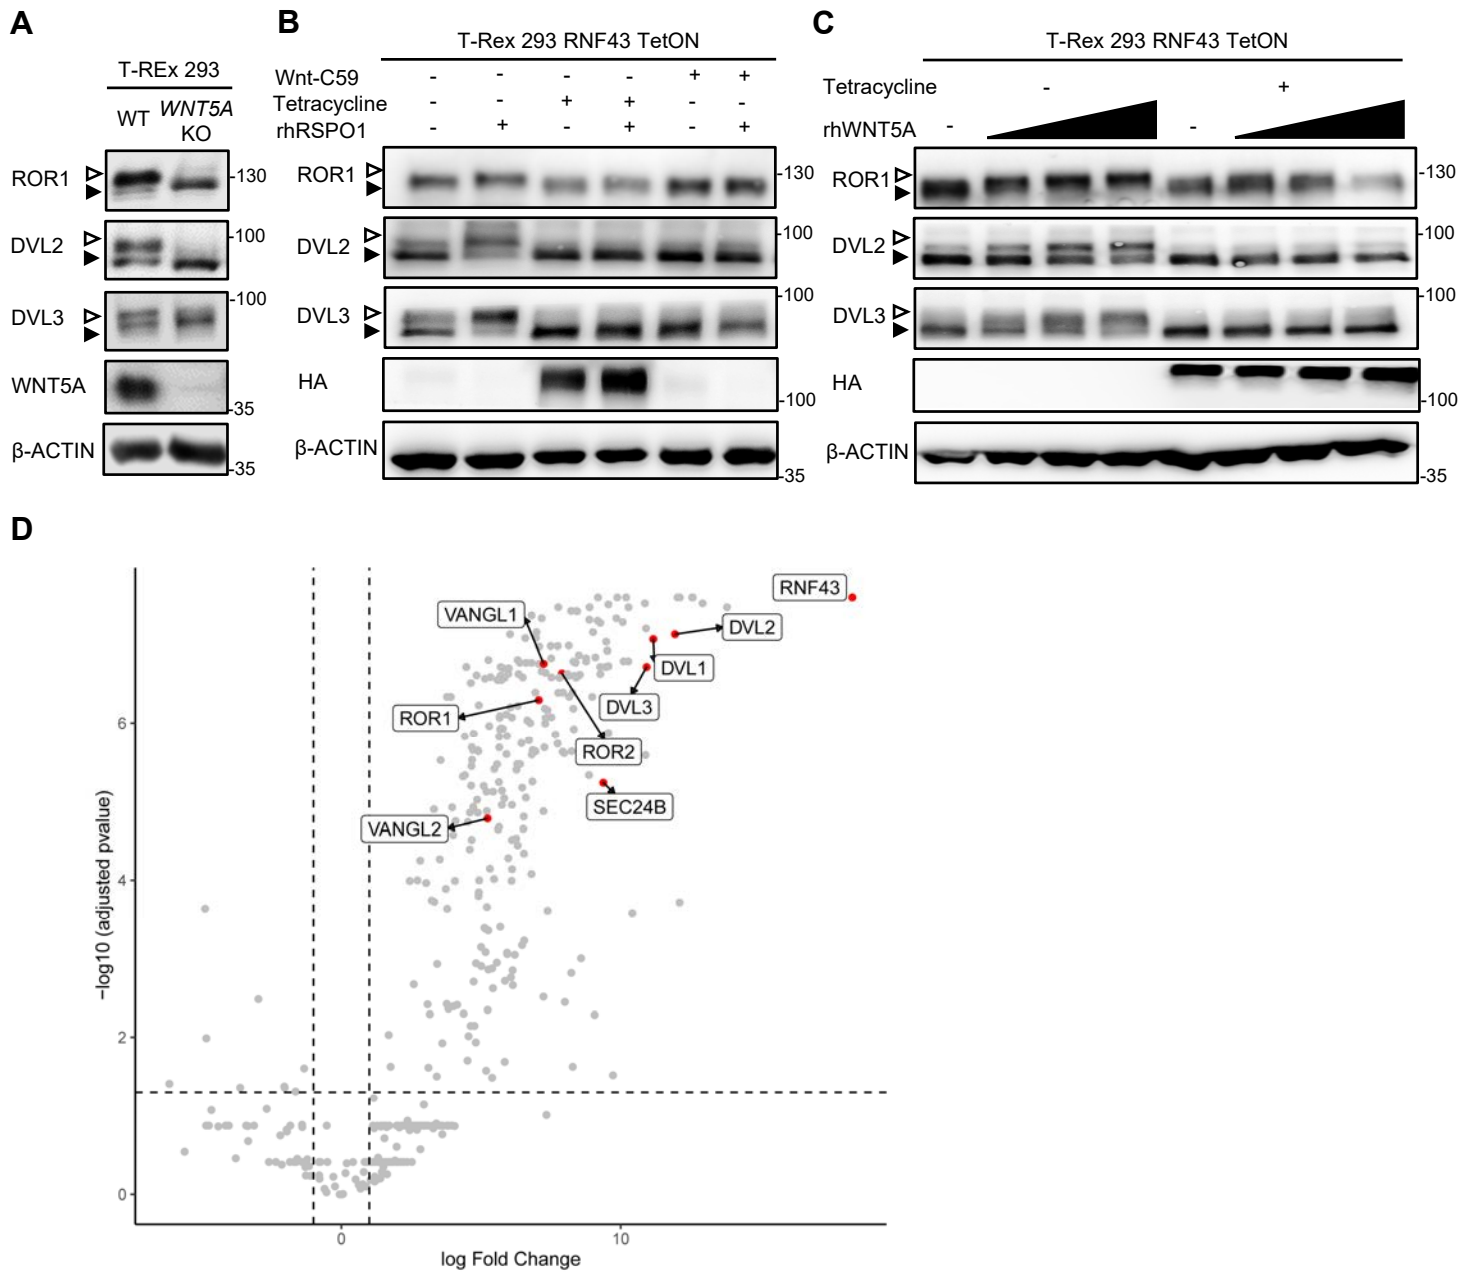

## Figure 2 RNF43 interacts with Wnt/PCP components

**A**

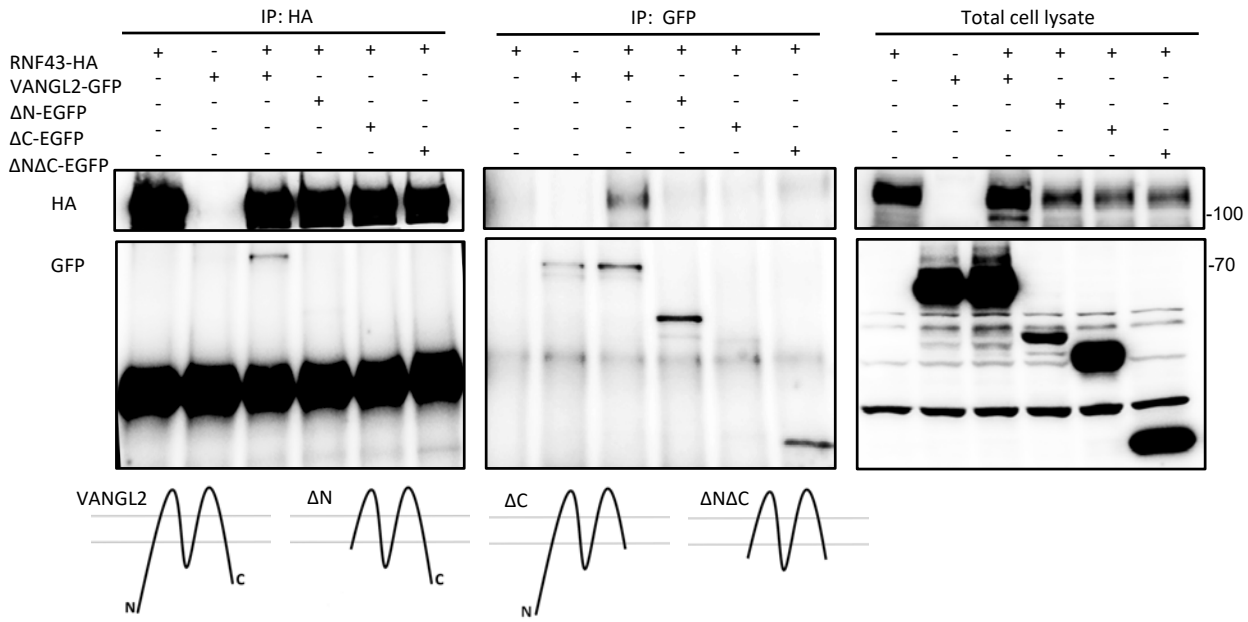

**B**

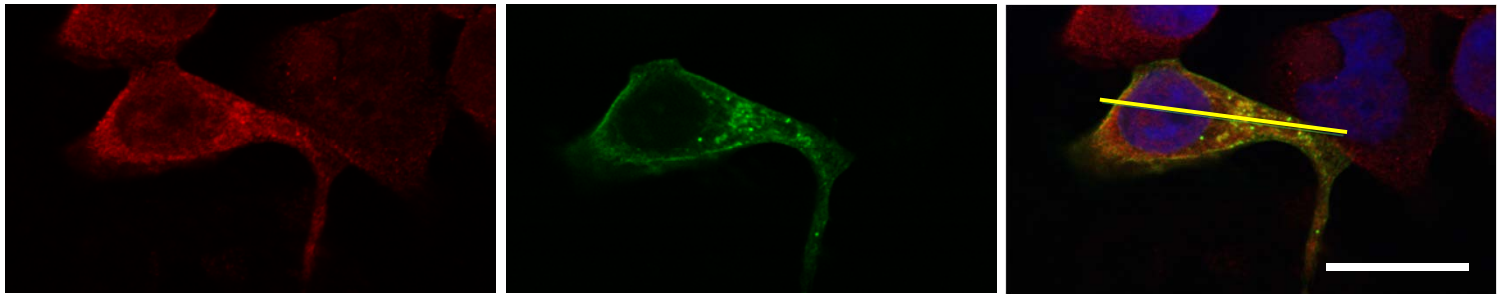

**B'**

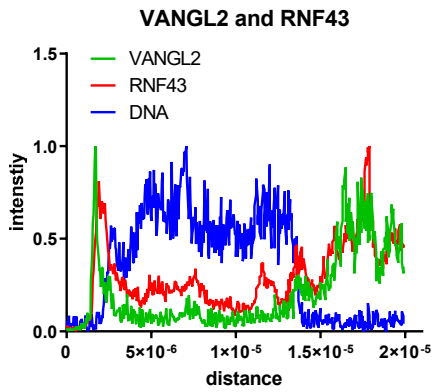

**C**

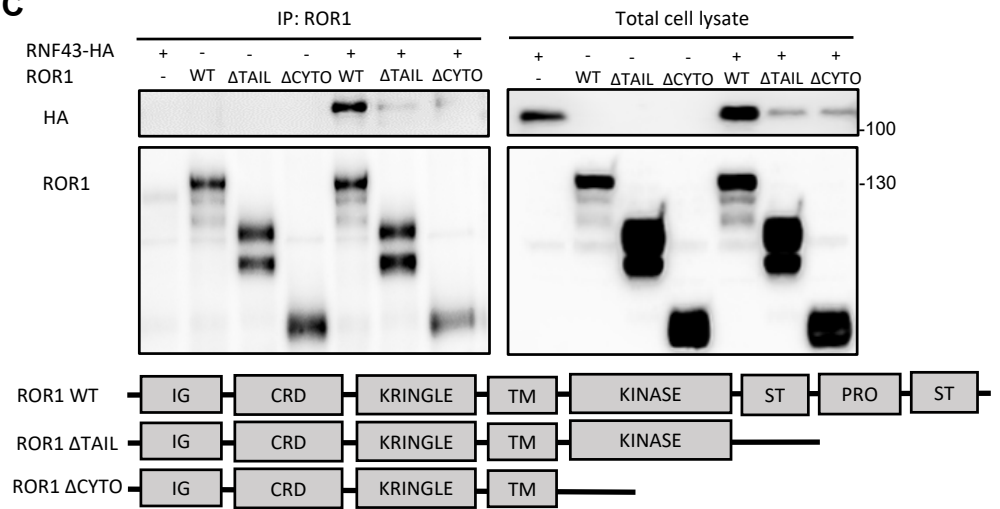

**D**

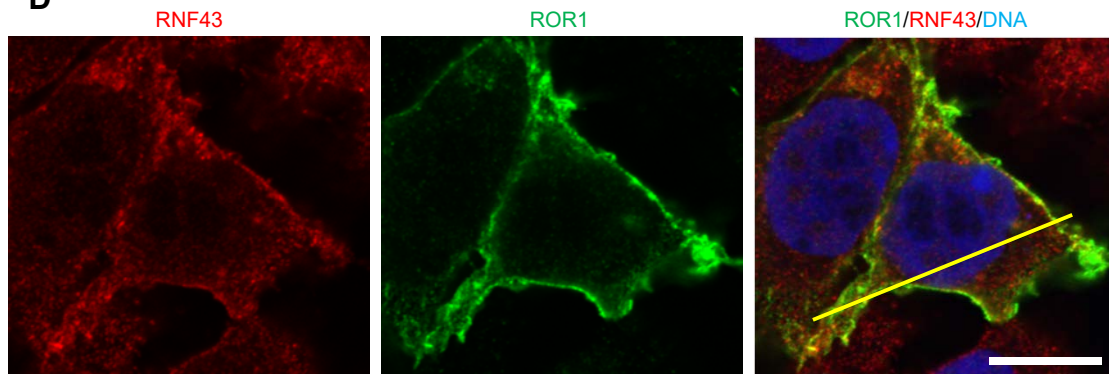

**D'**

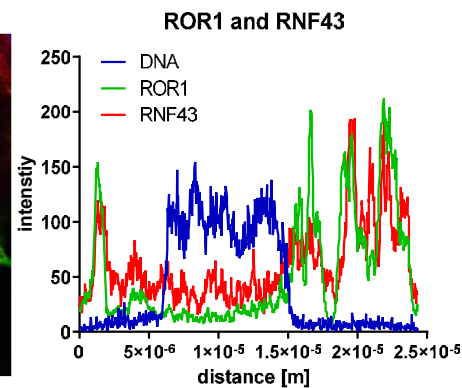



## Figure 3. Mechanism of Wnt/PCP inhibition by RNF43

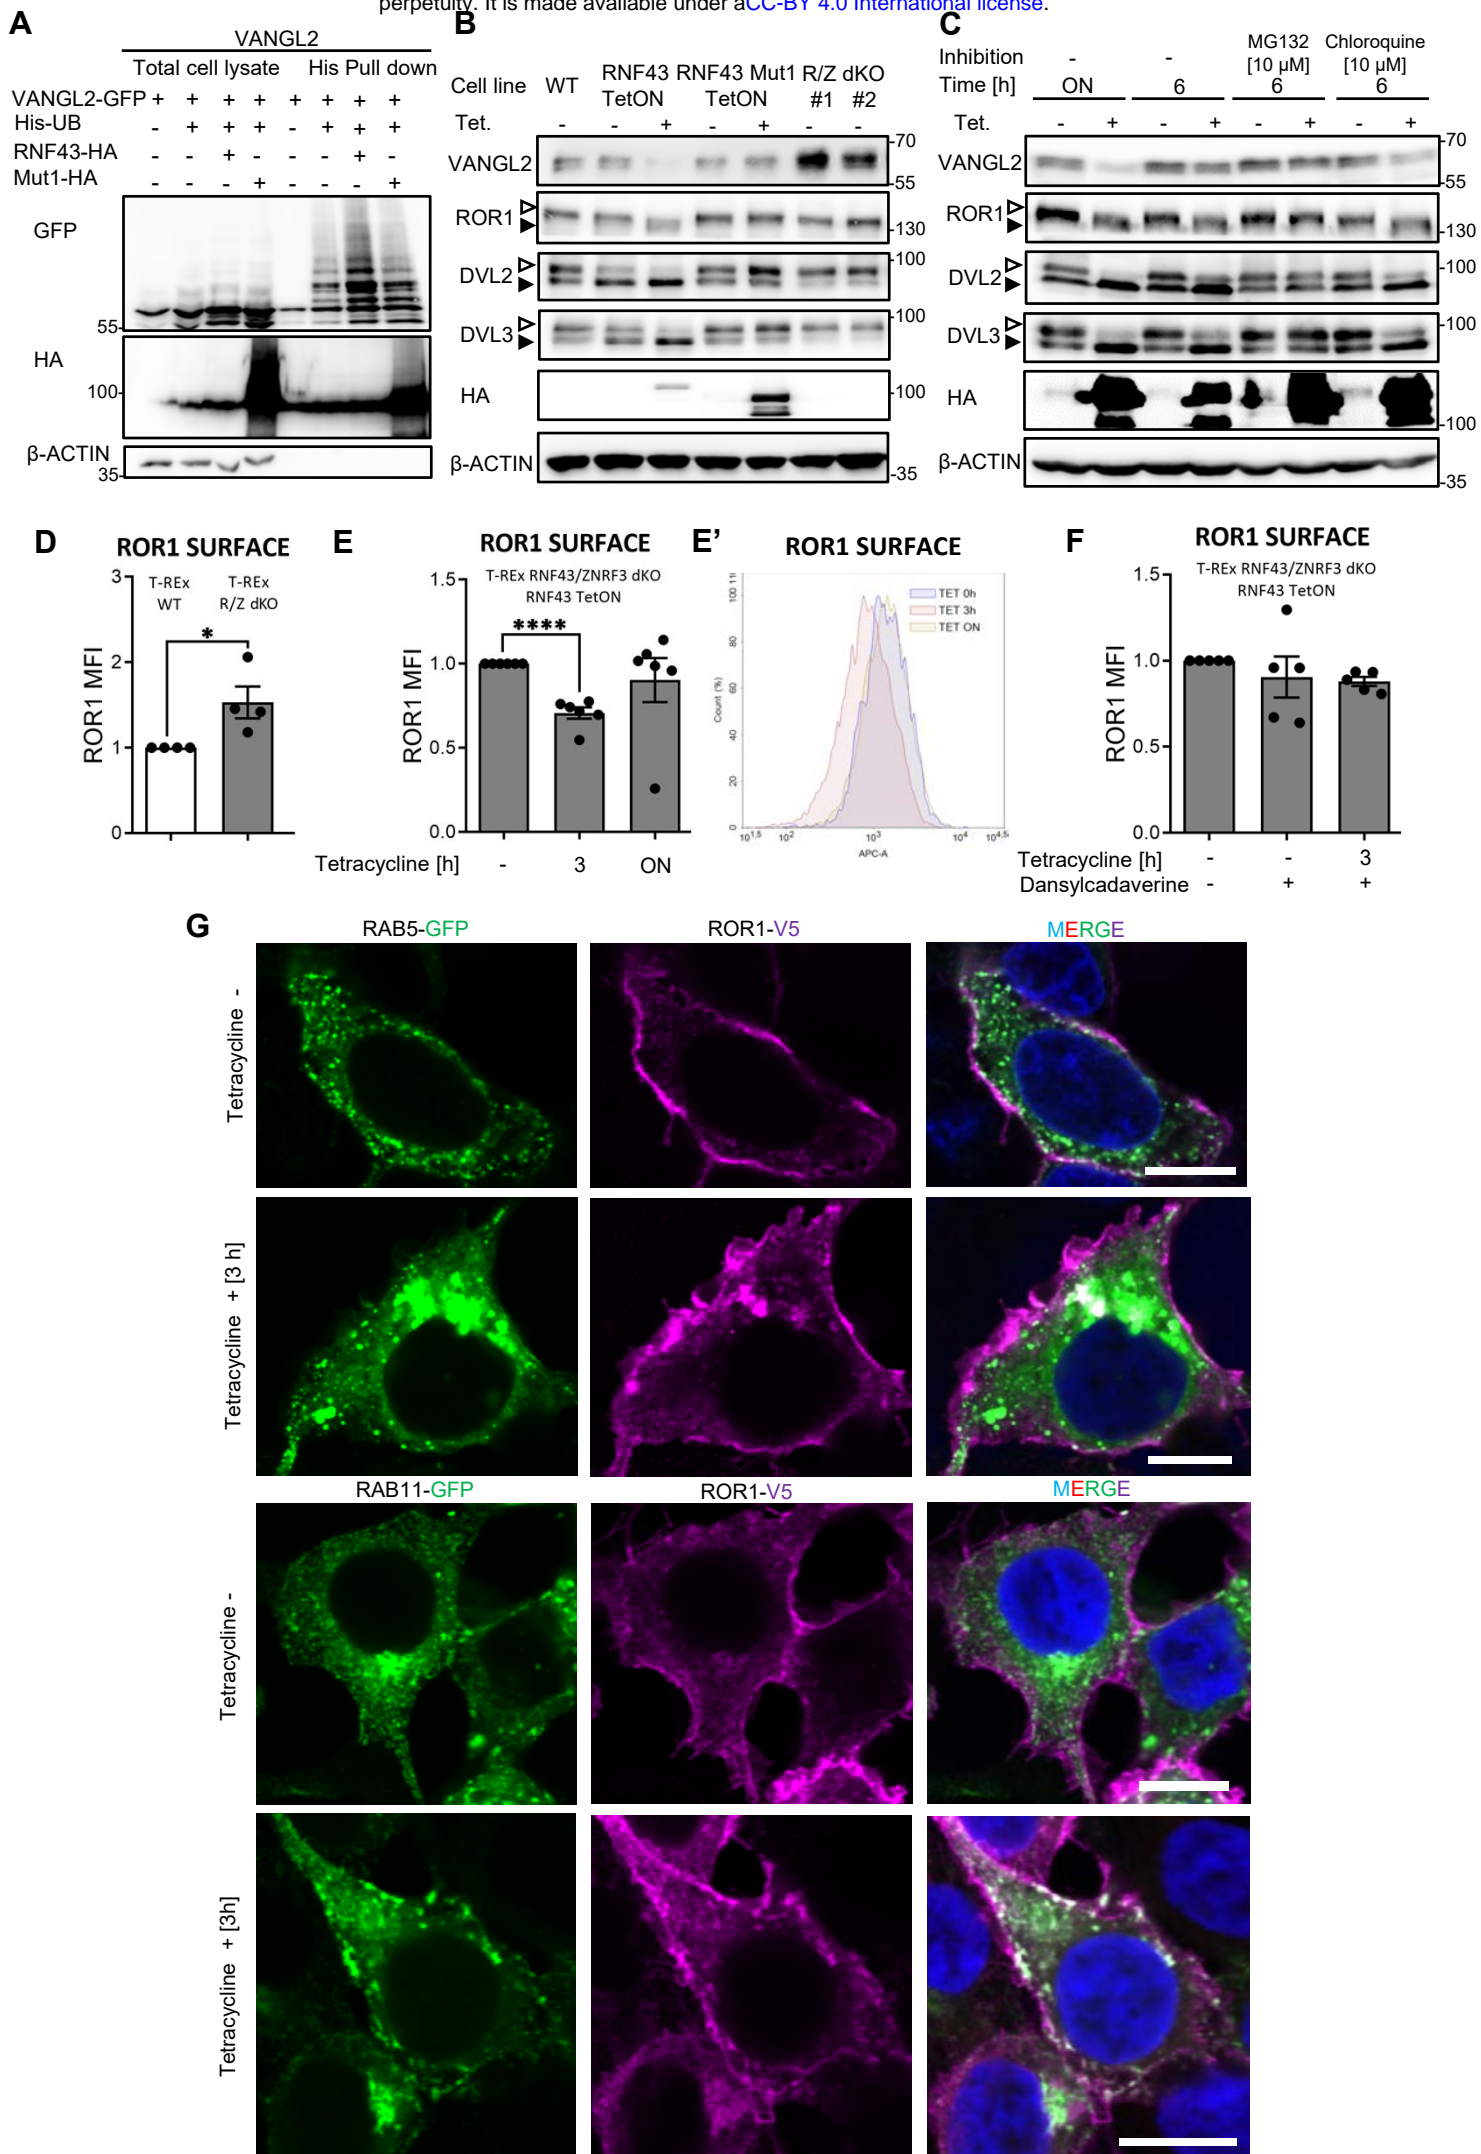

**Figure 3 figure supplement 1. Mechanism of Wnt PCP inhibition by RNF43**

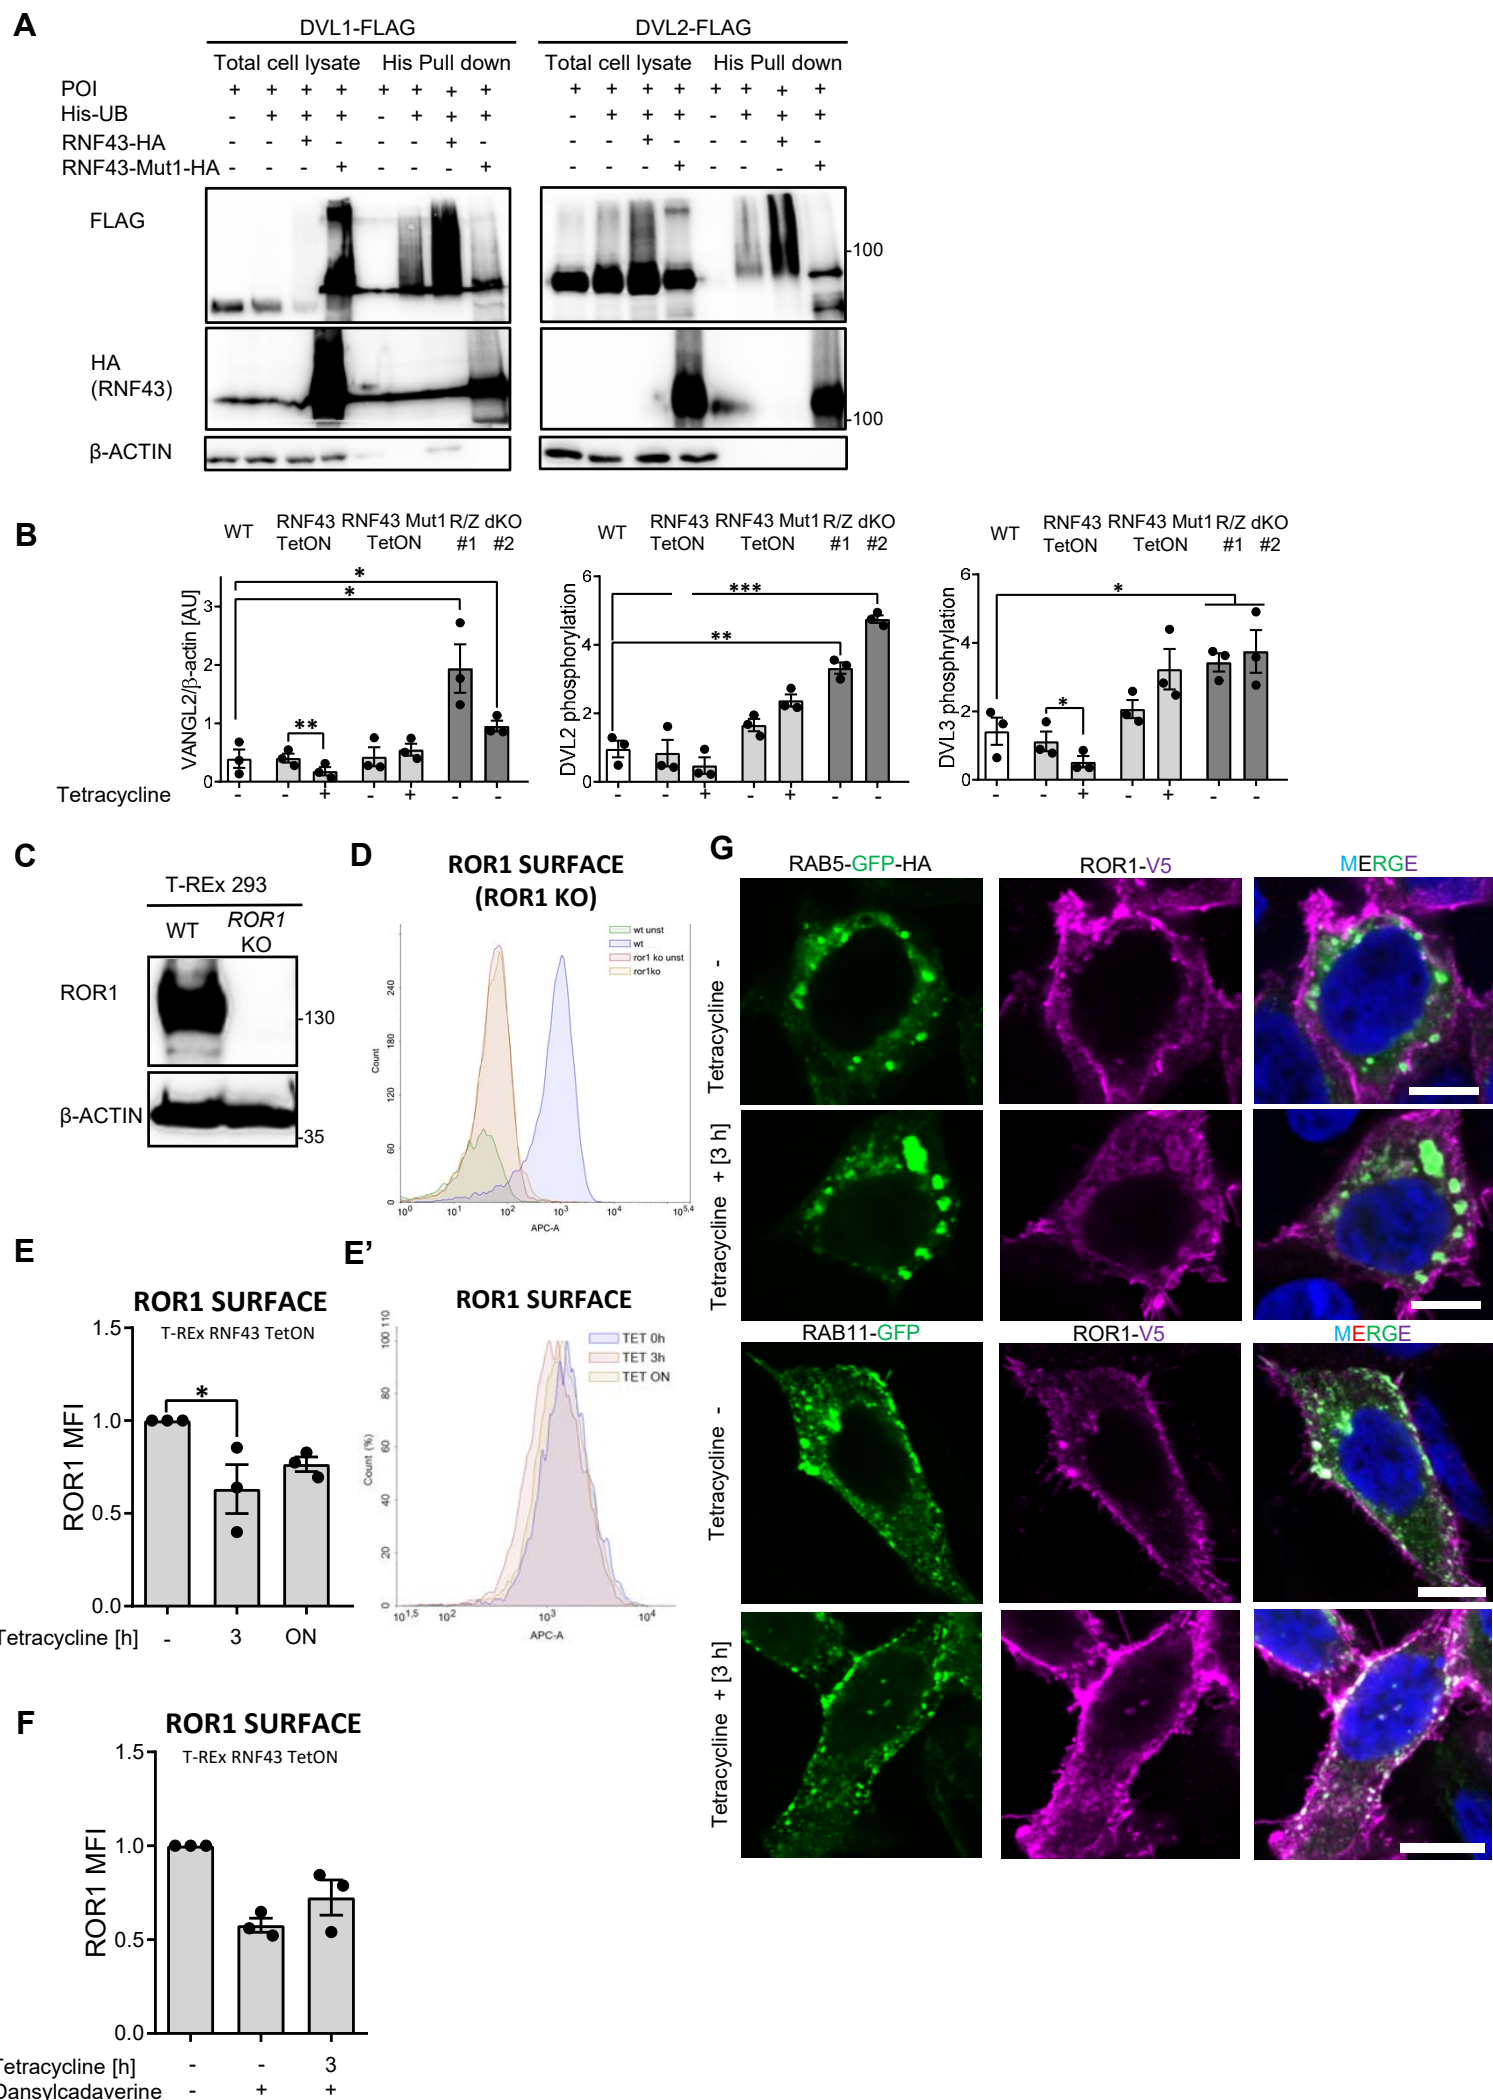



Figure 3 figure supplement 2 Mechanism of Wnt/PCP inhibition by RNF43

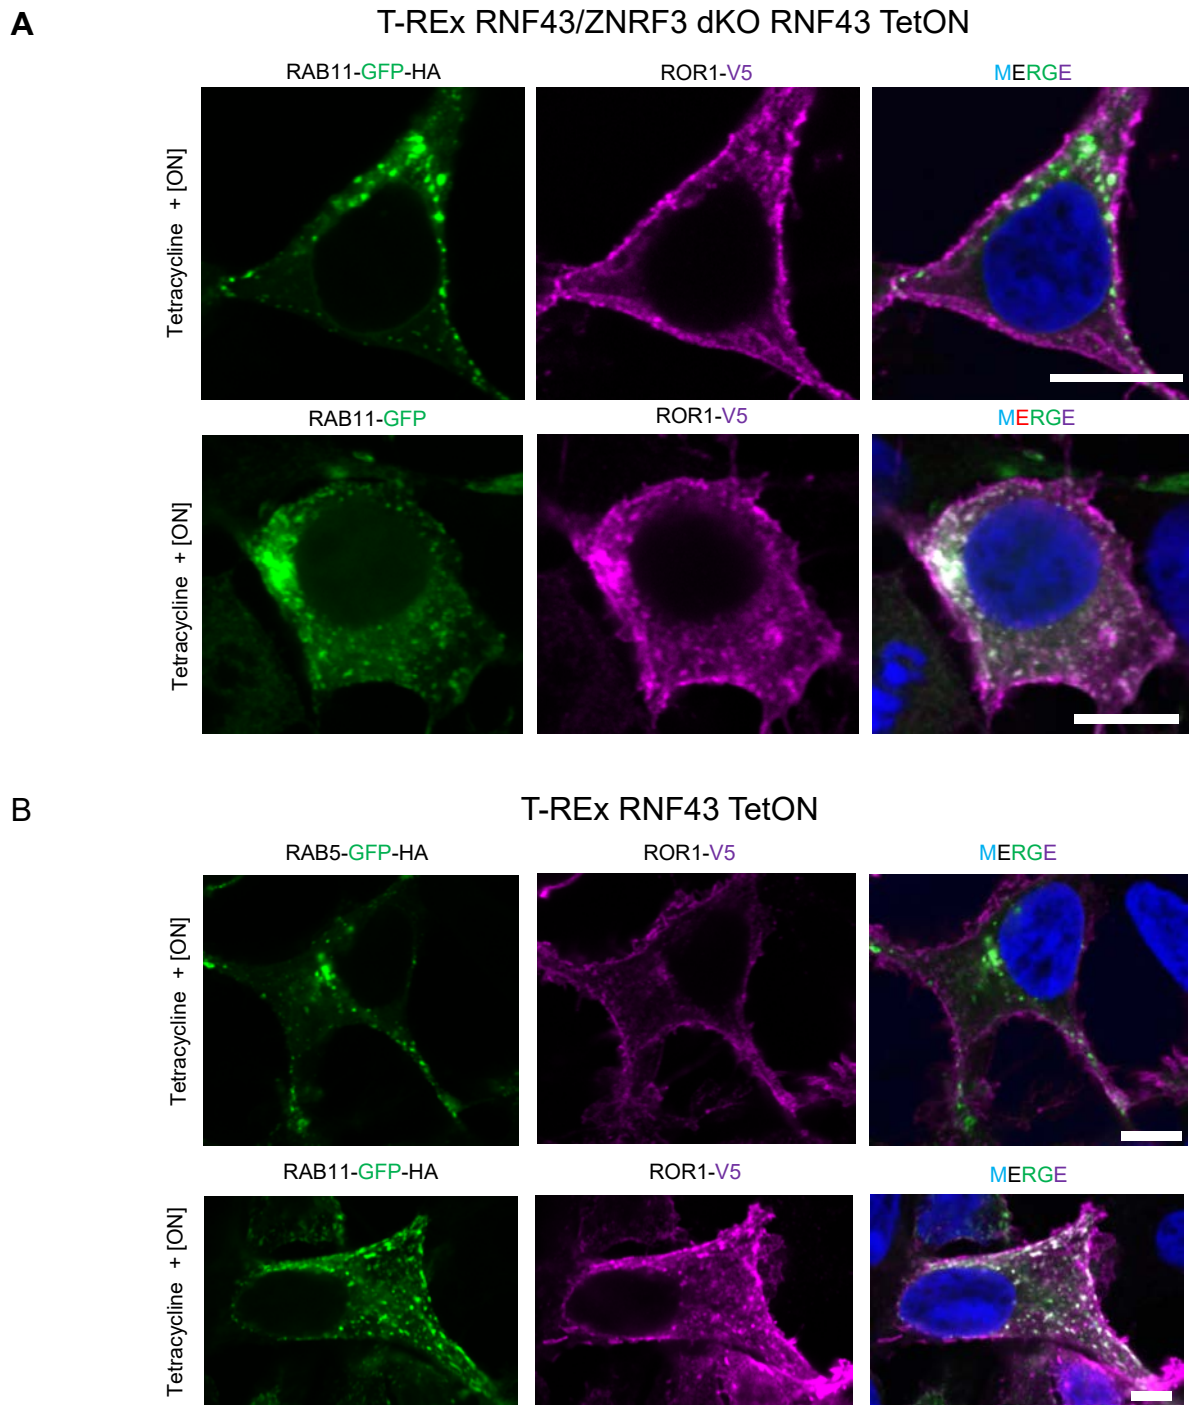

## Figure 4: RNF43 in melanoma

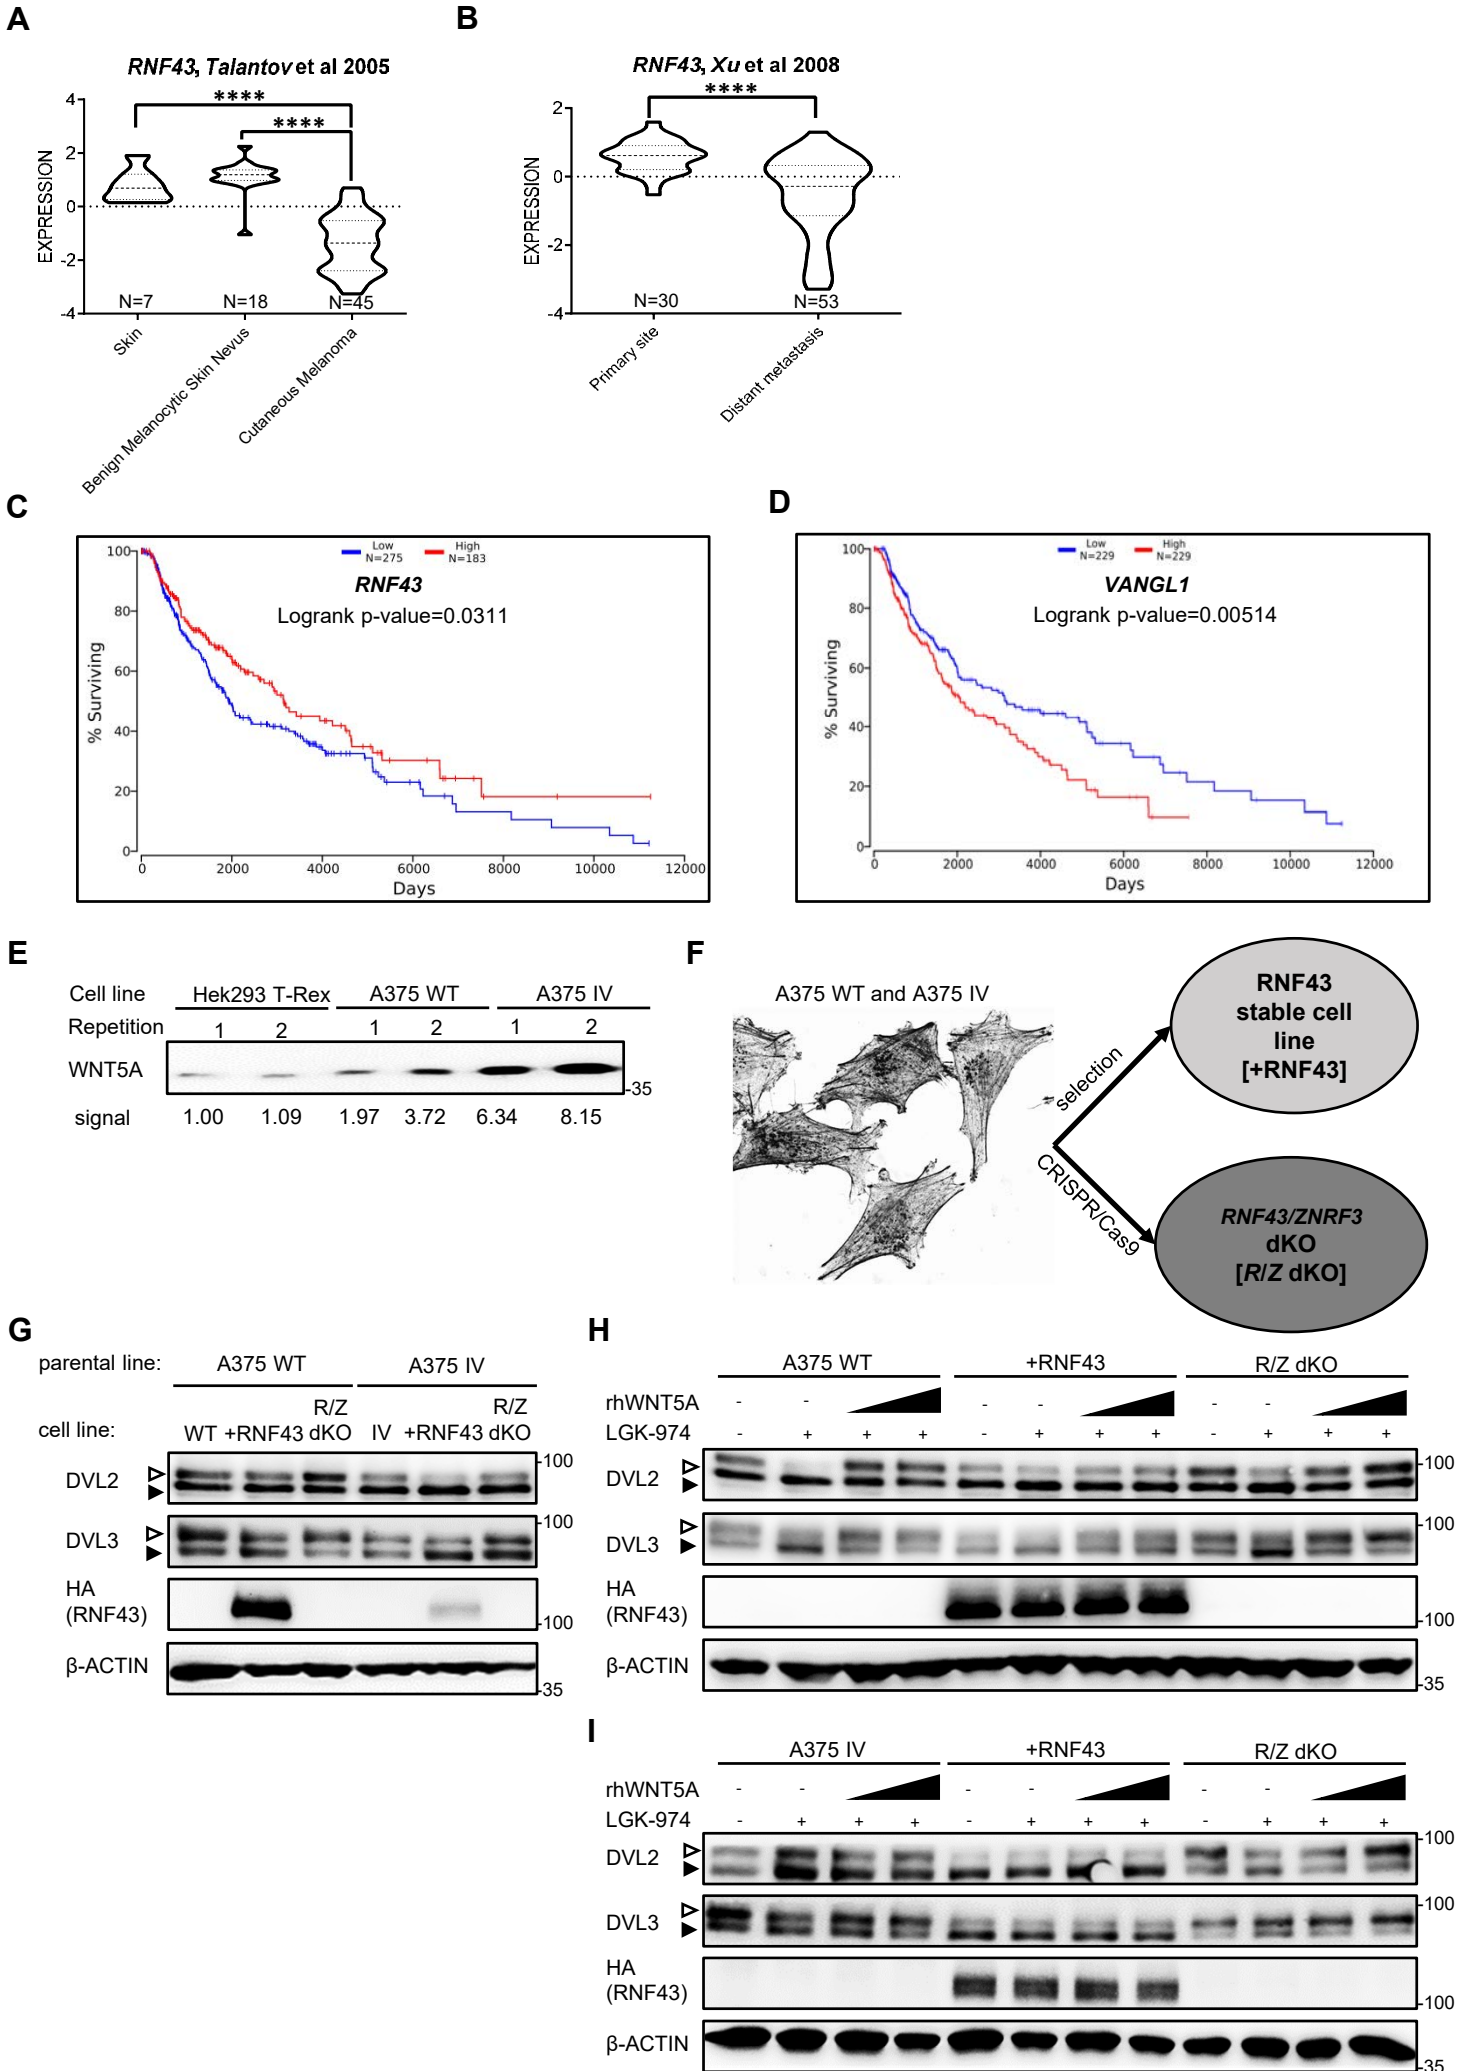

## Figure 4 figure supplement 1. RNF43 in melanoma

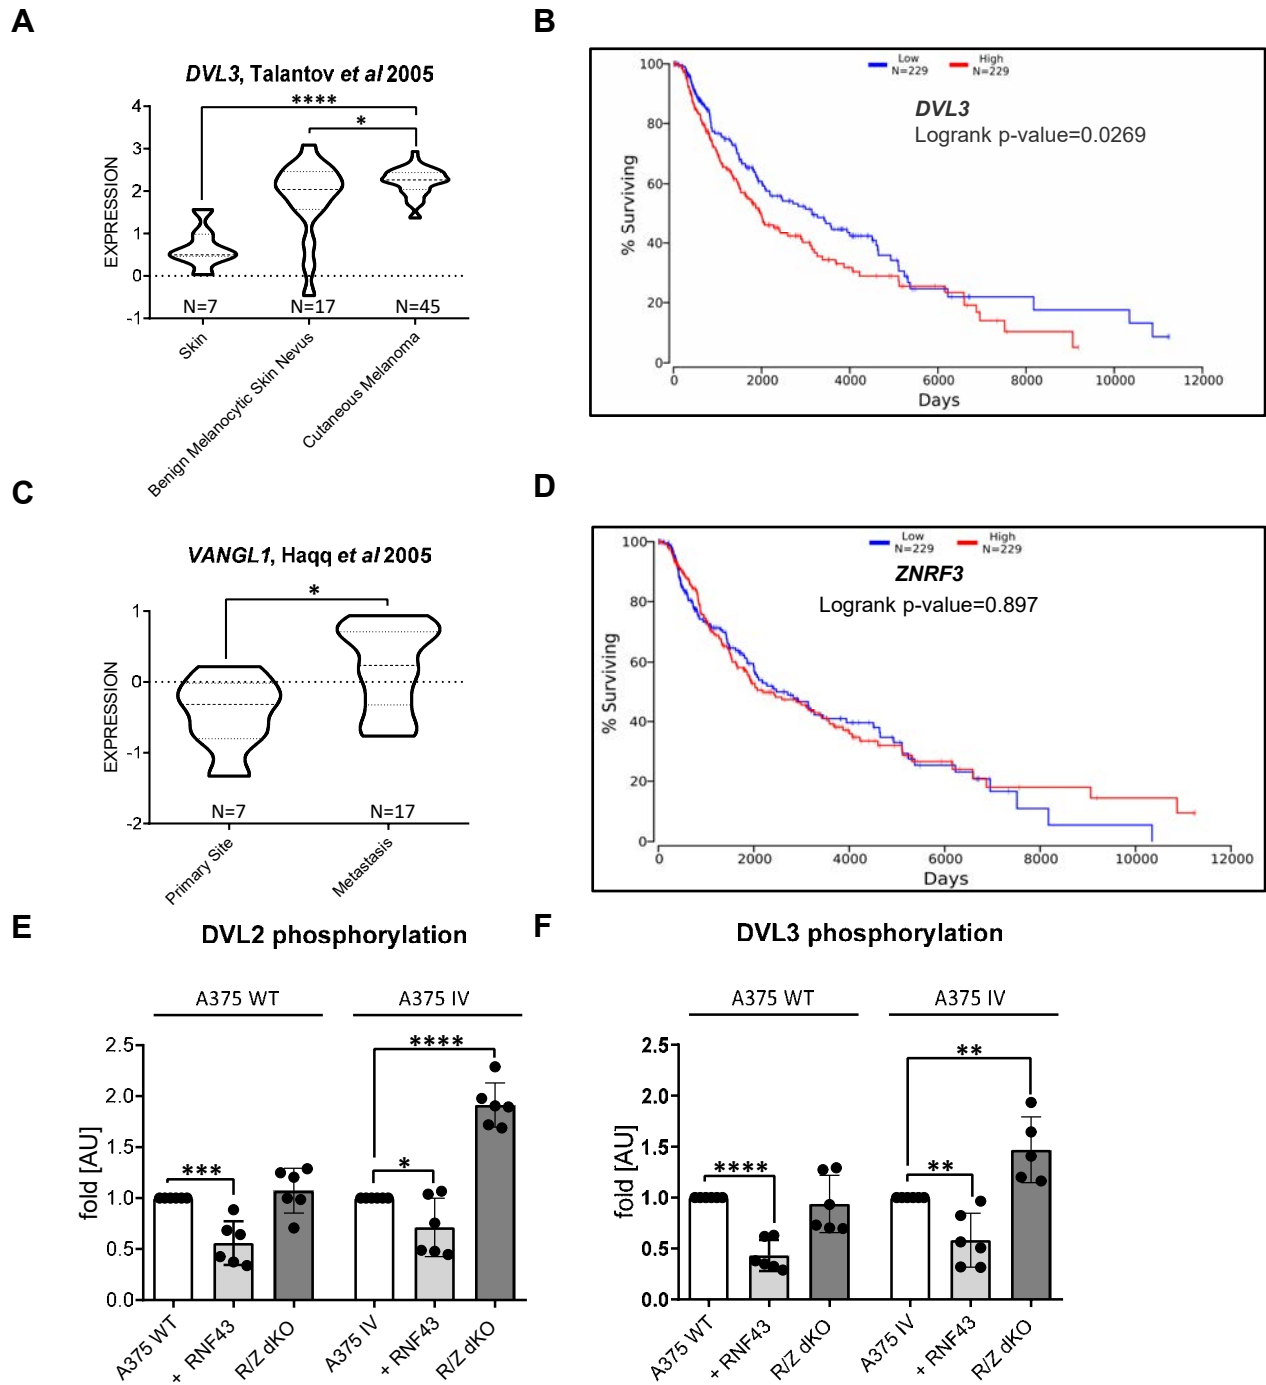

**Figure 4 figure supplement 2. RNF43 in melanoma**

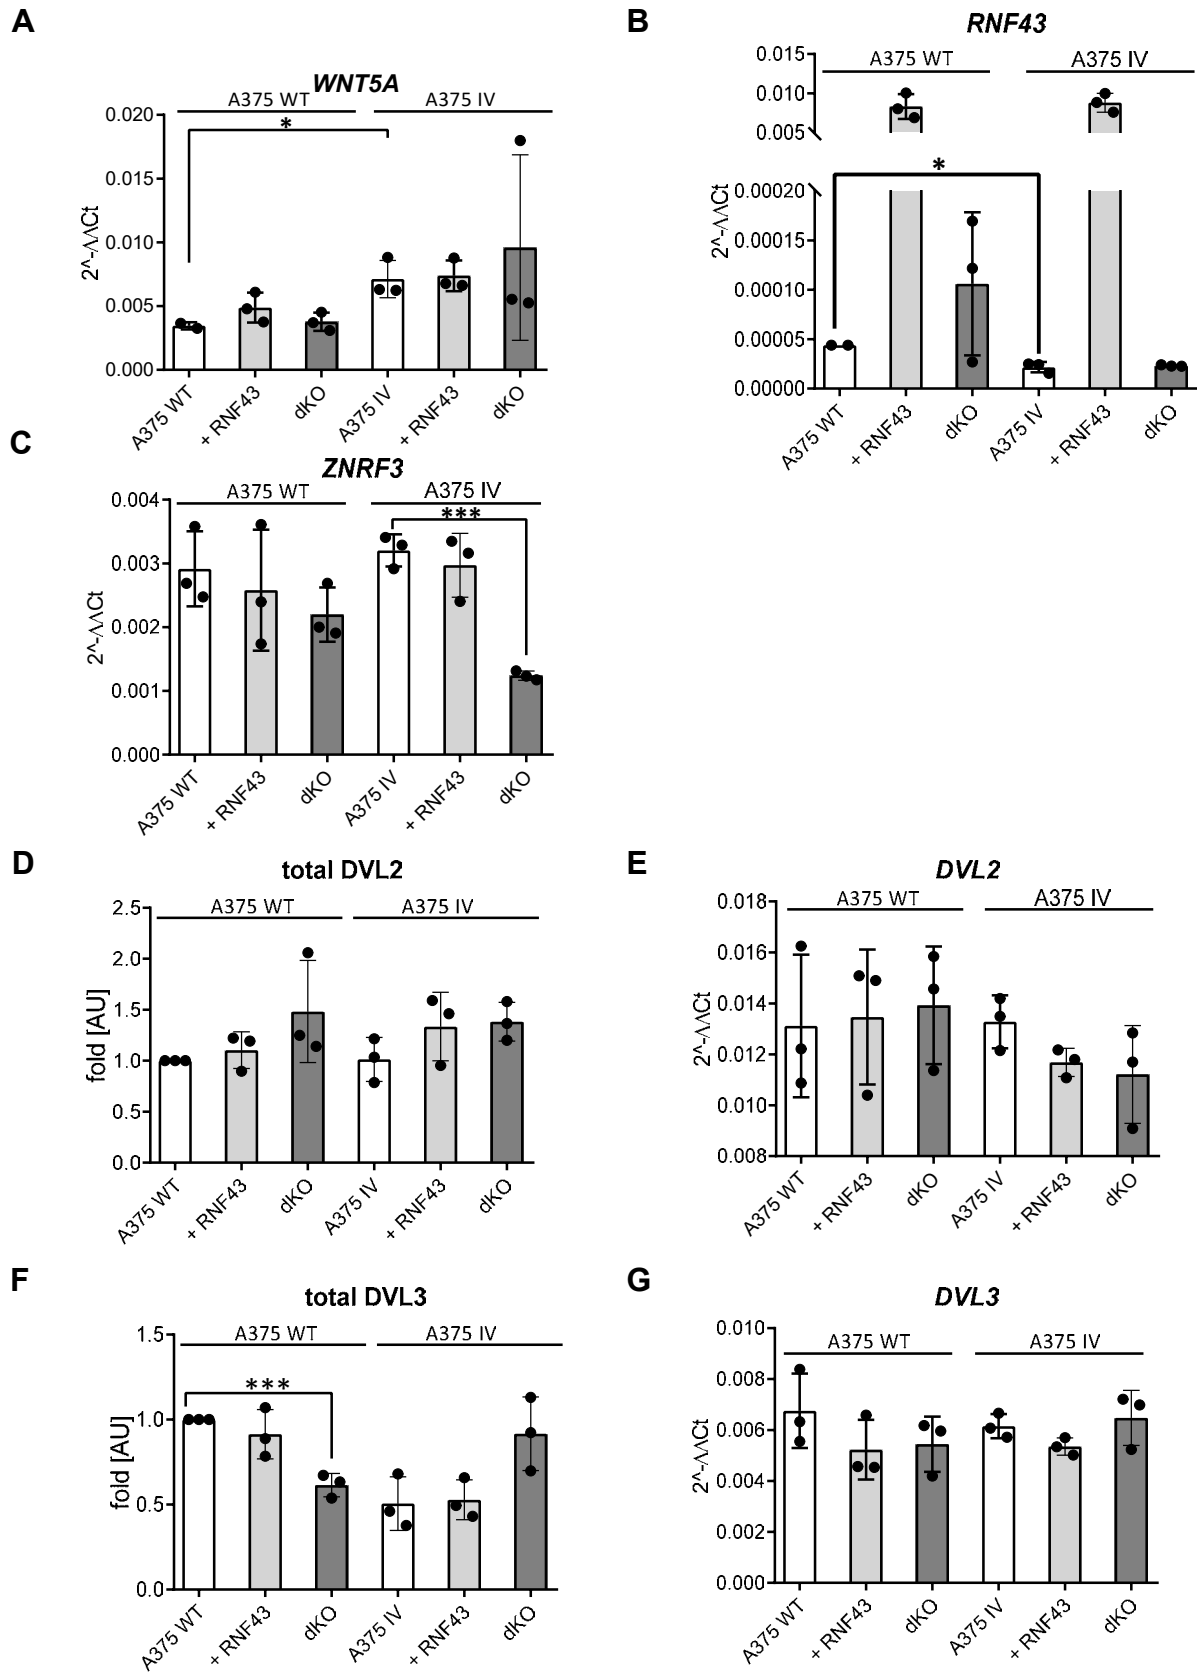

# Figure 5. RNF43 inhibits WNT5A dependent invasive properties of human melanoma

## melanoma

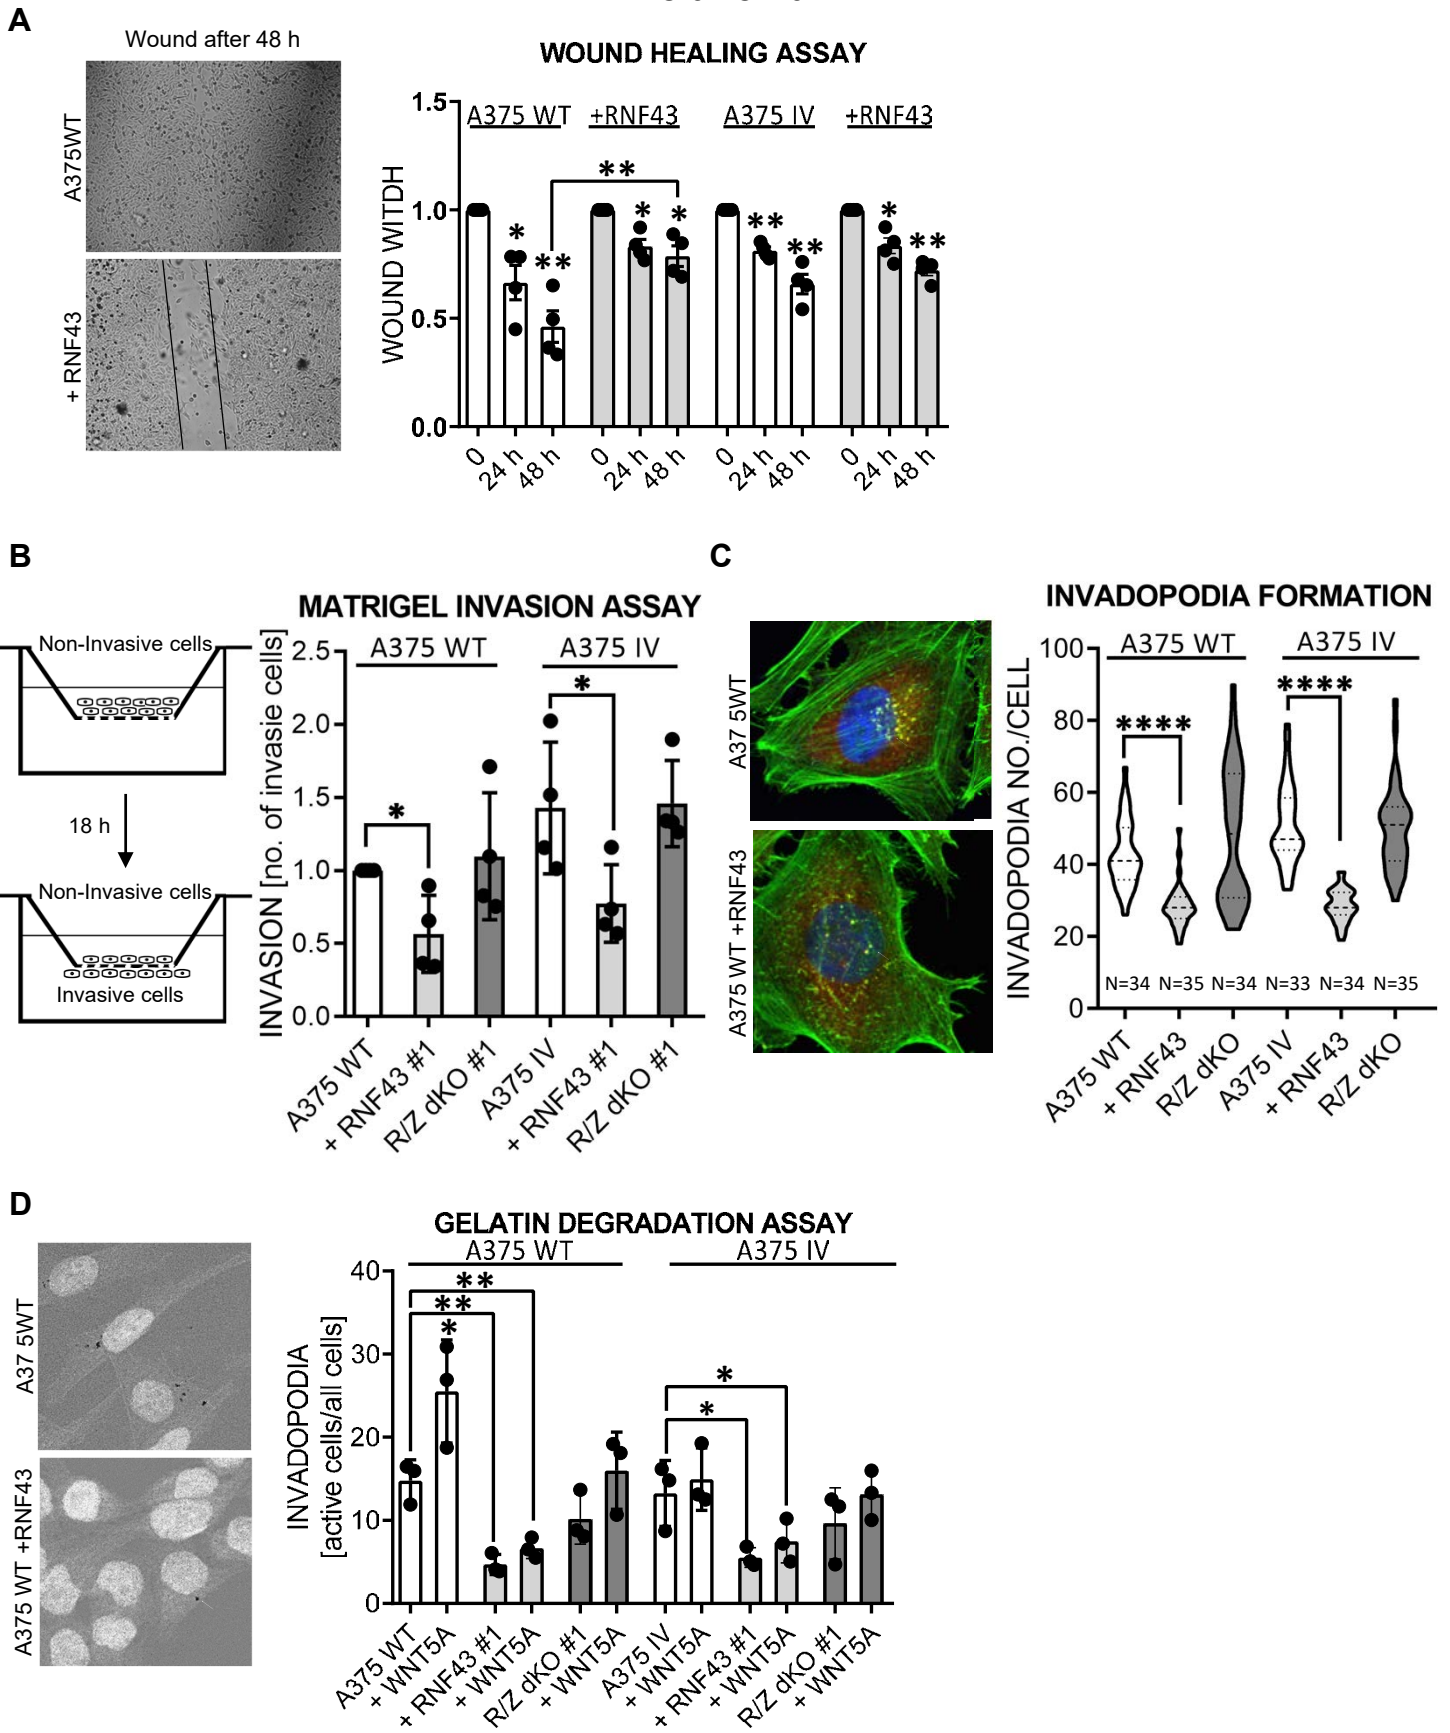

## Figure 5 figure supplement 1. RNF43 inhibits Wnt5a dependent invasive properties of human melanoma

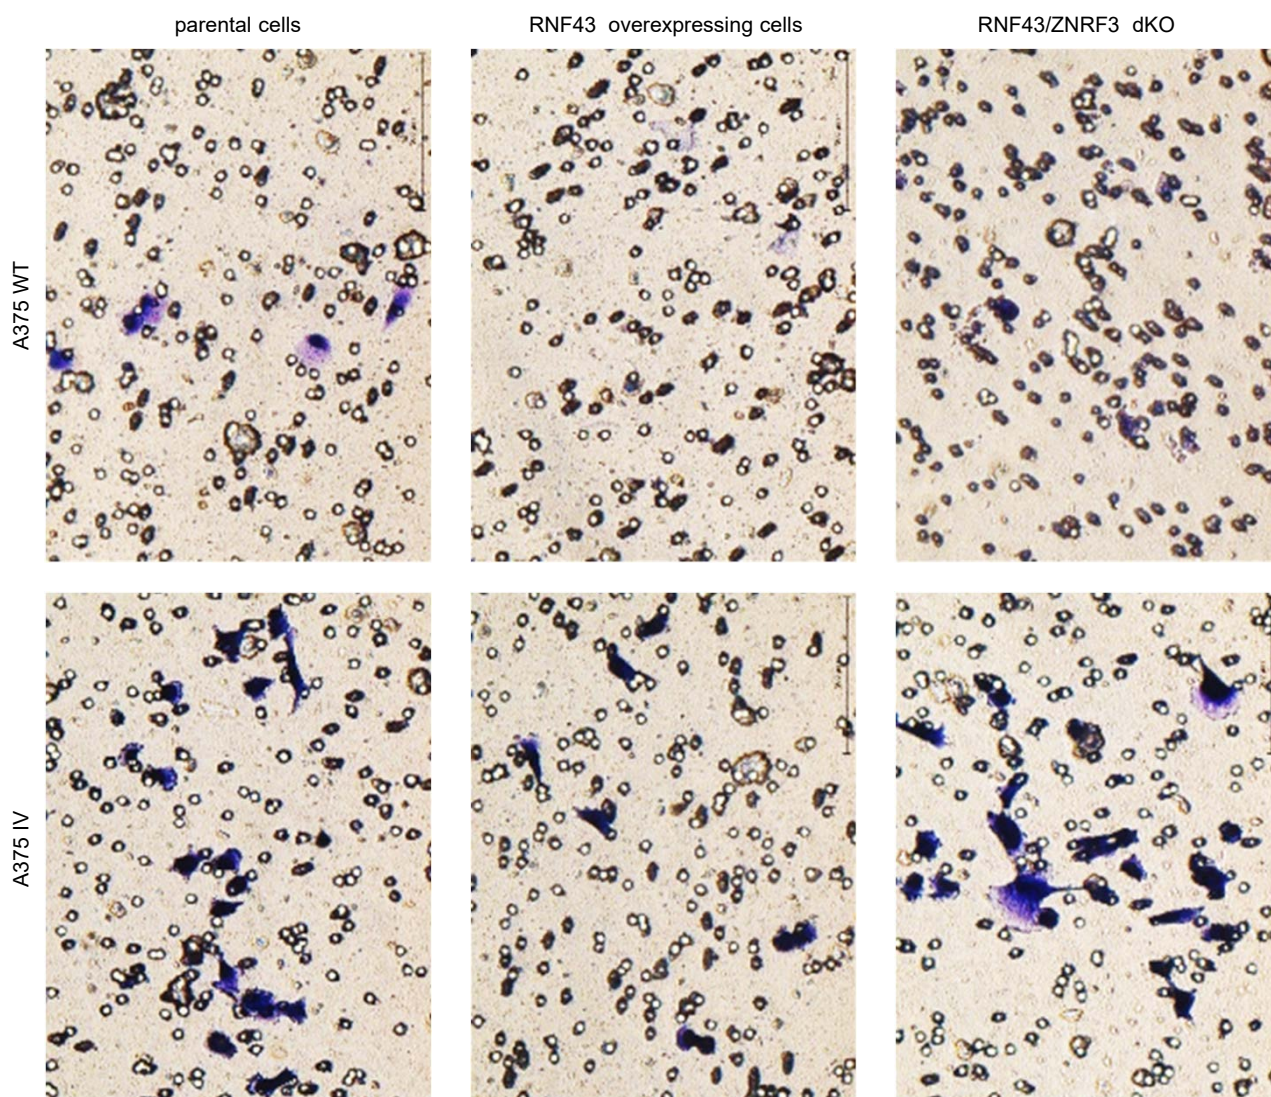

## Figure 5 figure supplement 2. RNF43 inhibits Wnt5a dependent invasive properties of human melanoma

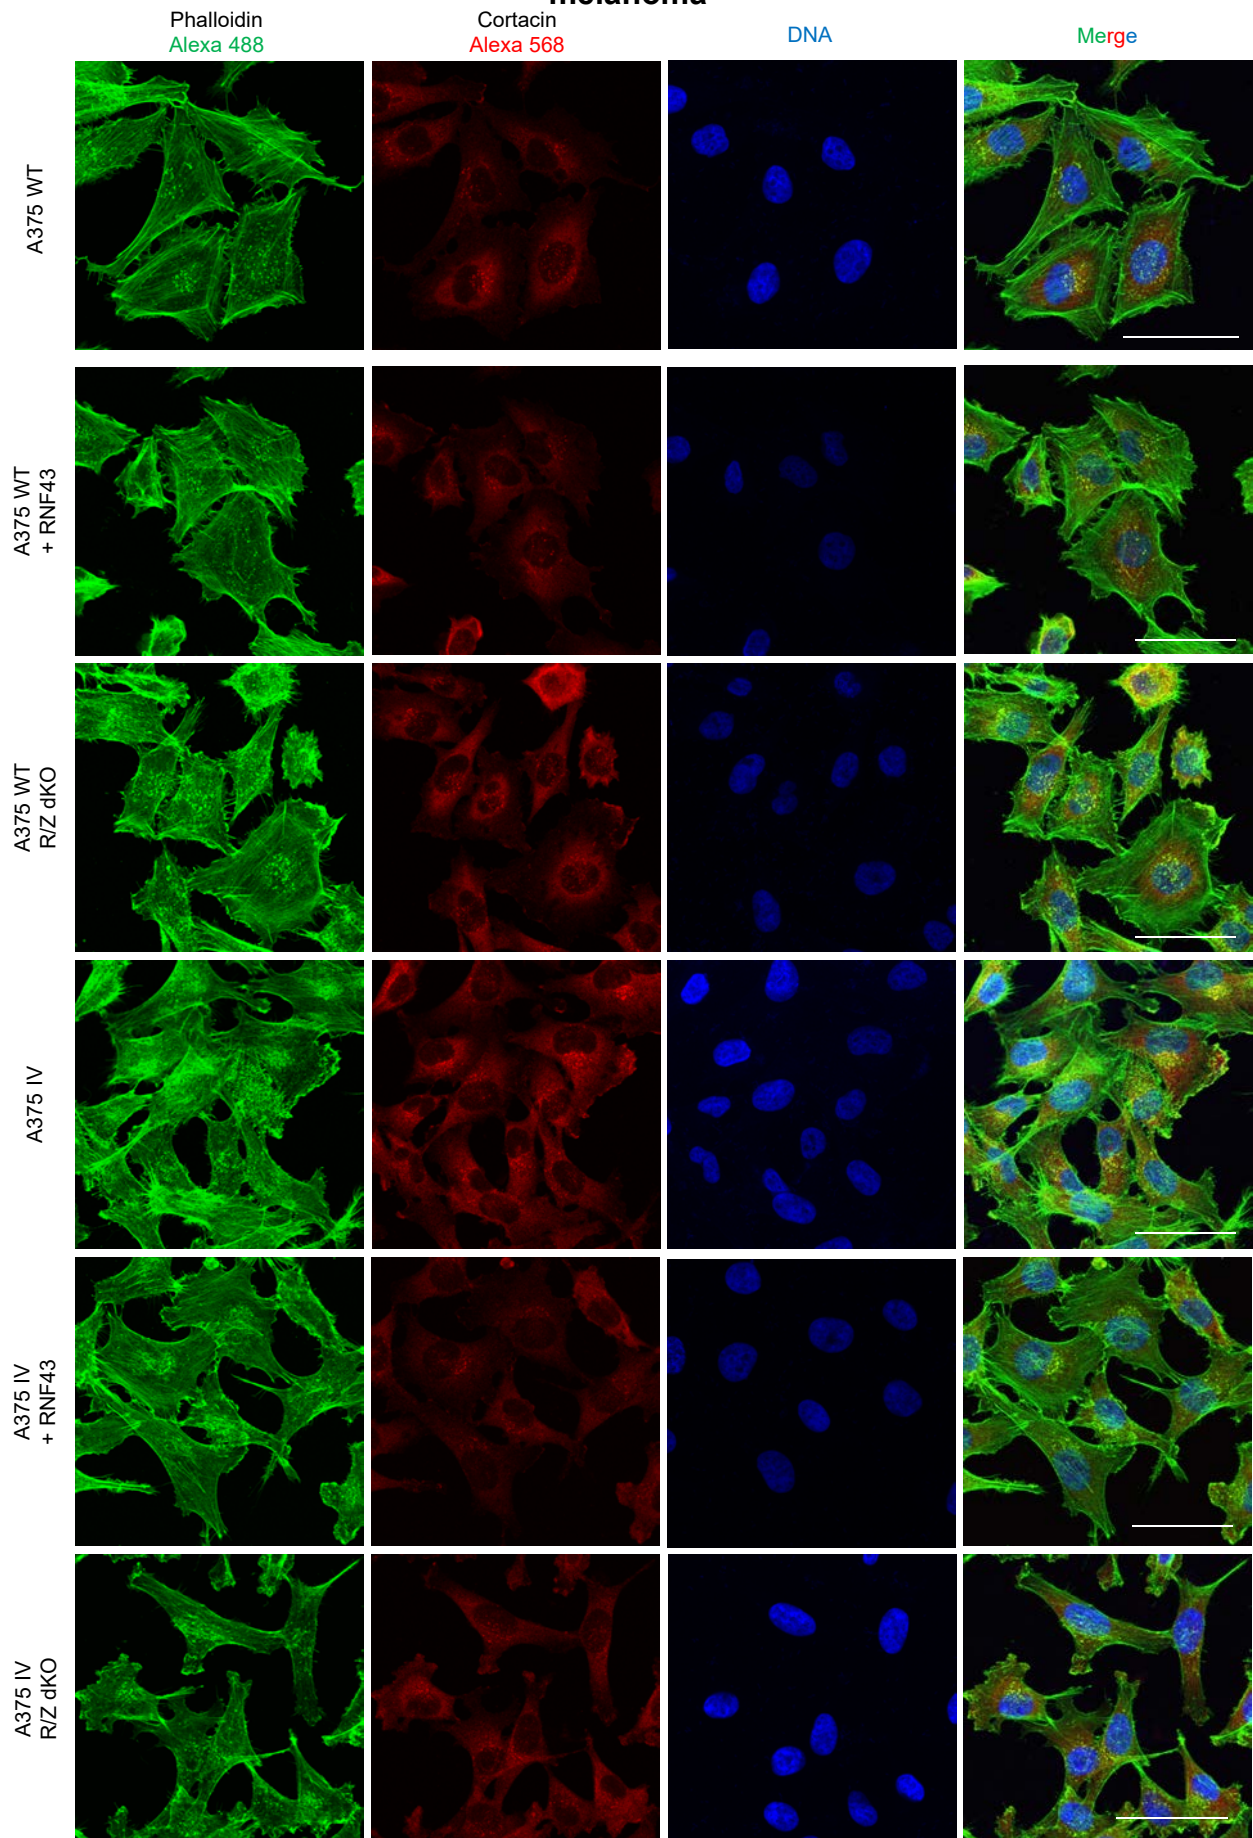

### Figure 5 figure supplement 3: RNF43 inhibits Wnt5a dependent invasive properties of human melanoma

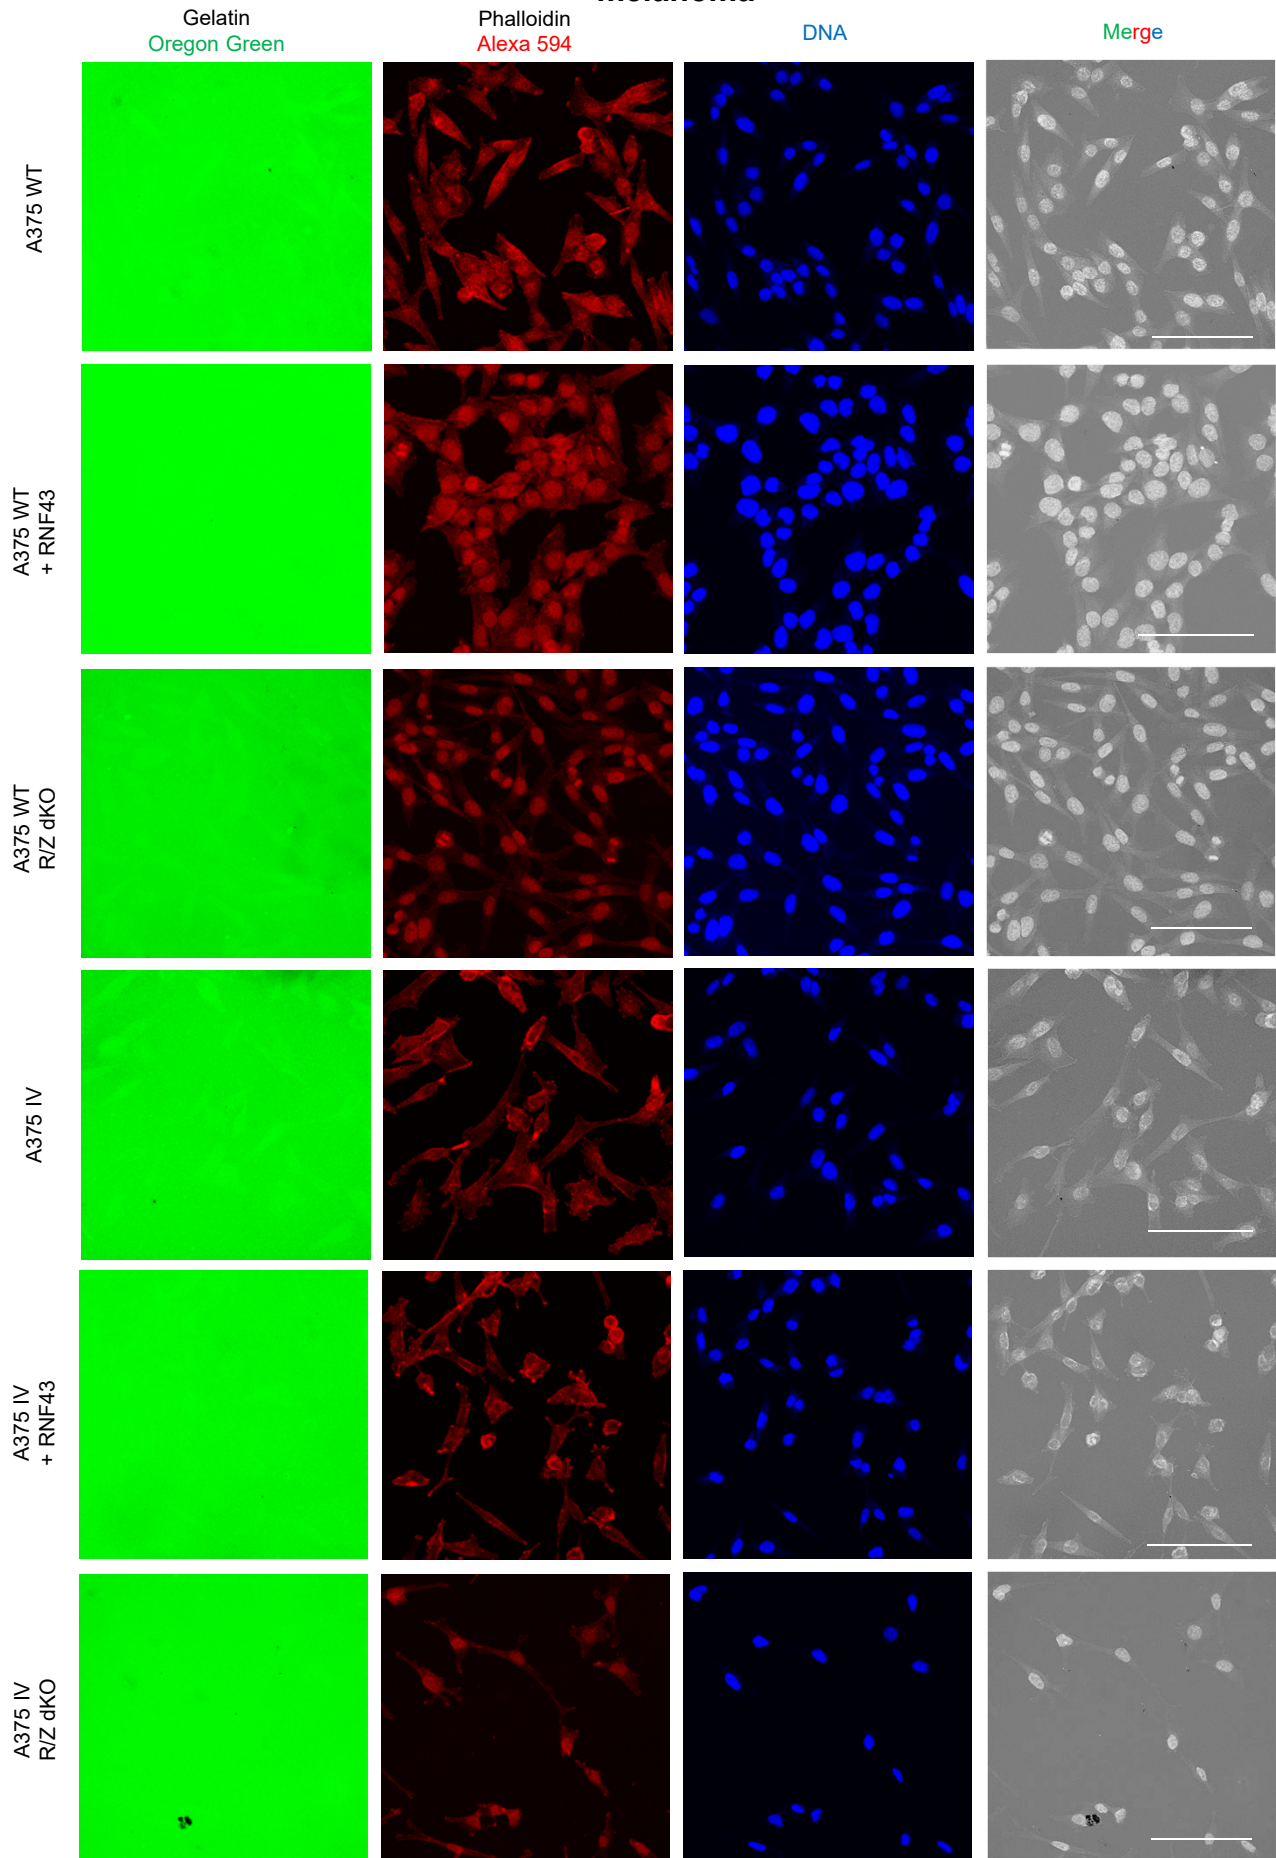



## Figure 5 figure supplement 4: RNF43 inhibits Wnt5a dependent invasive properties of human melanoma

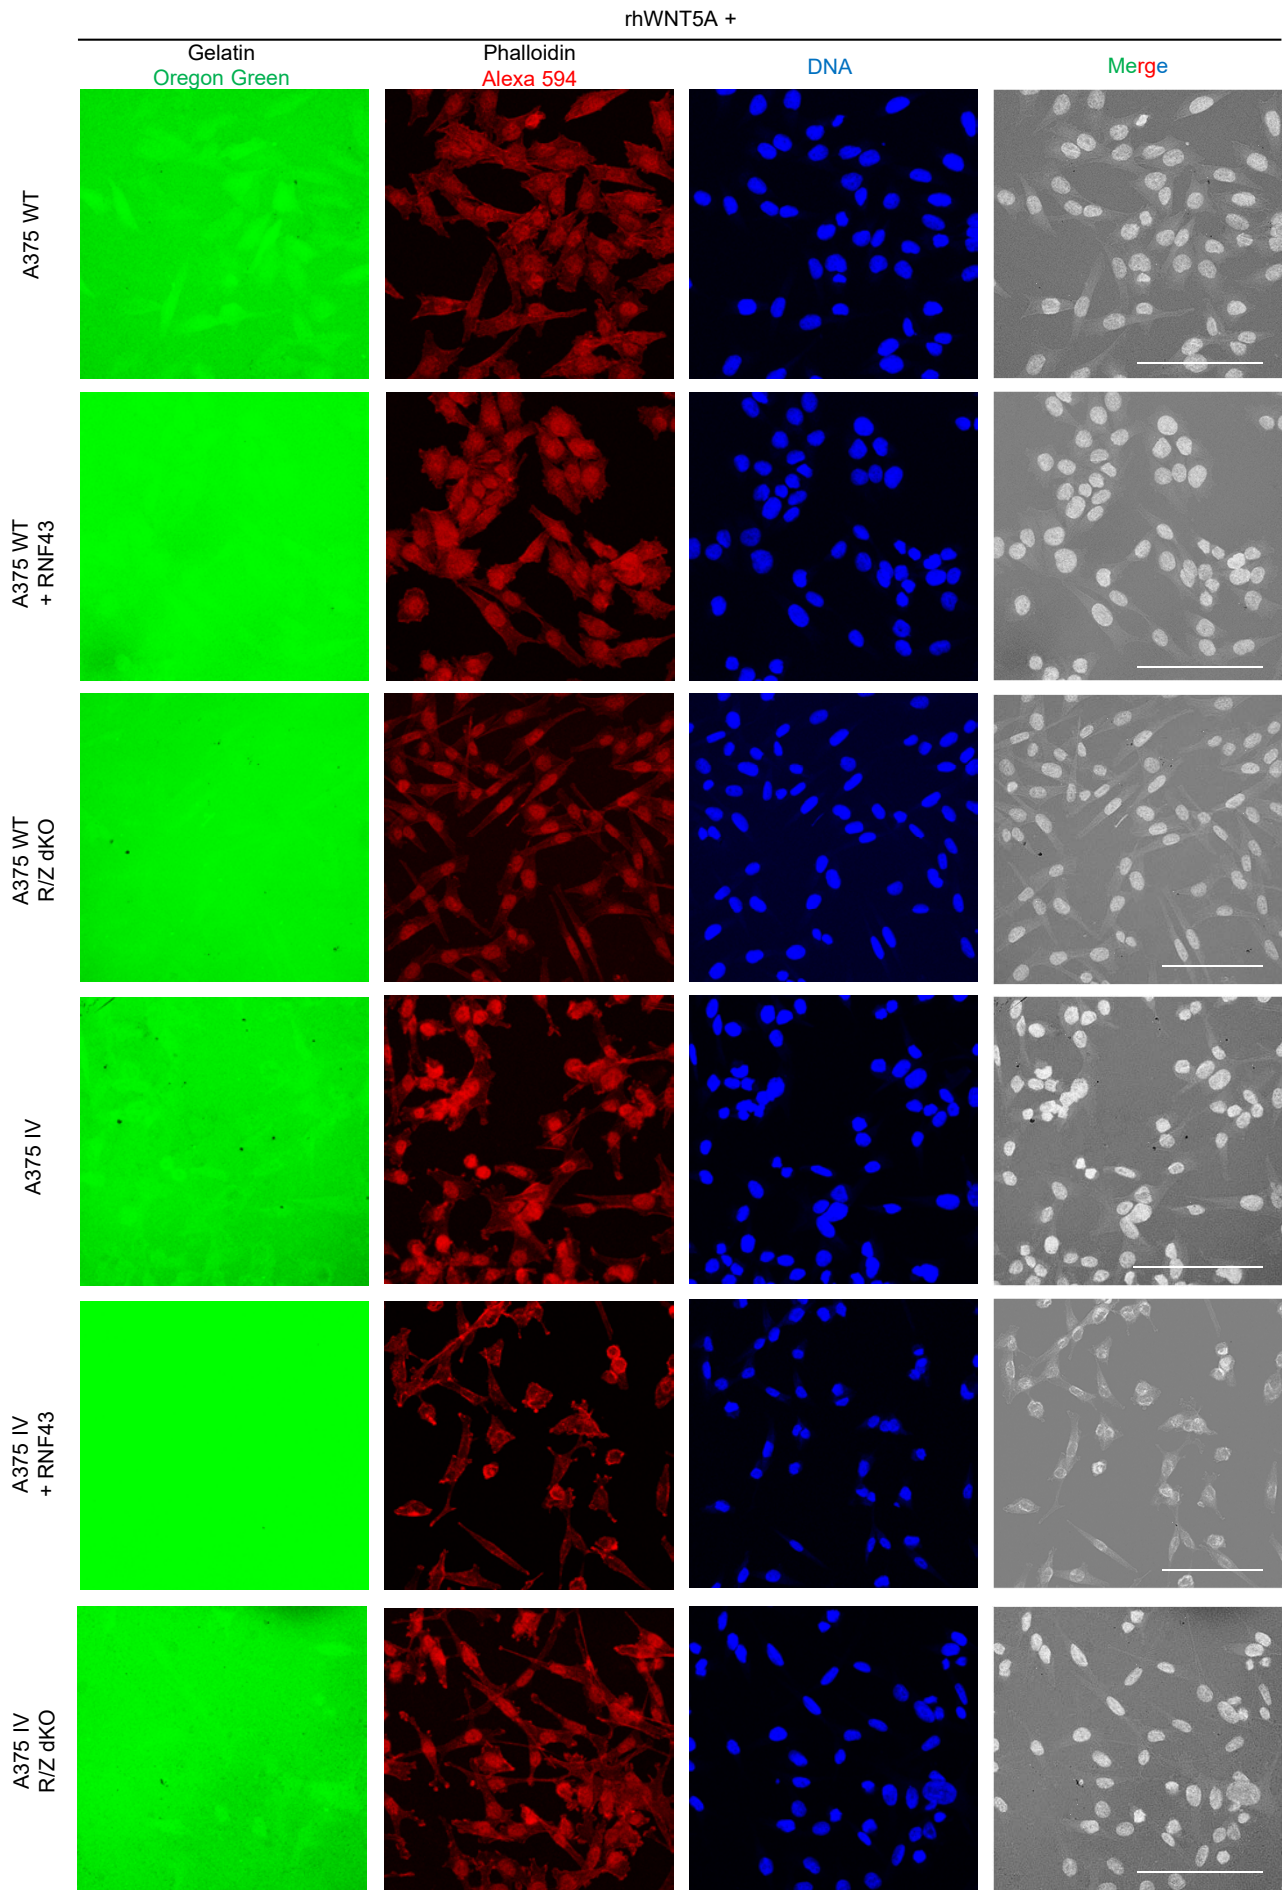

## Figure 6. RNF43 overexpressing melanoma cells do not develop resistance to BRAFi inhibition

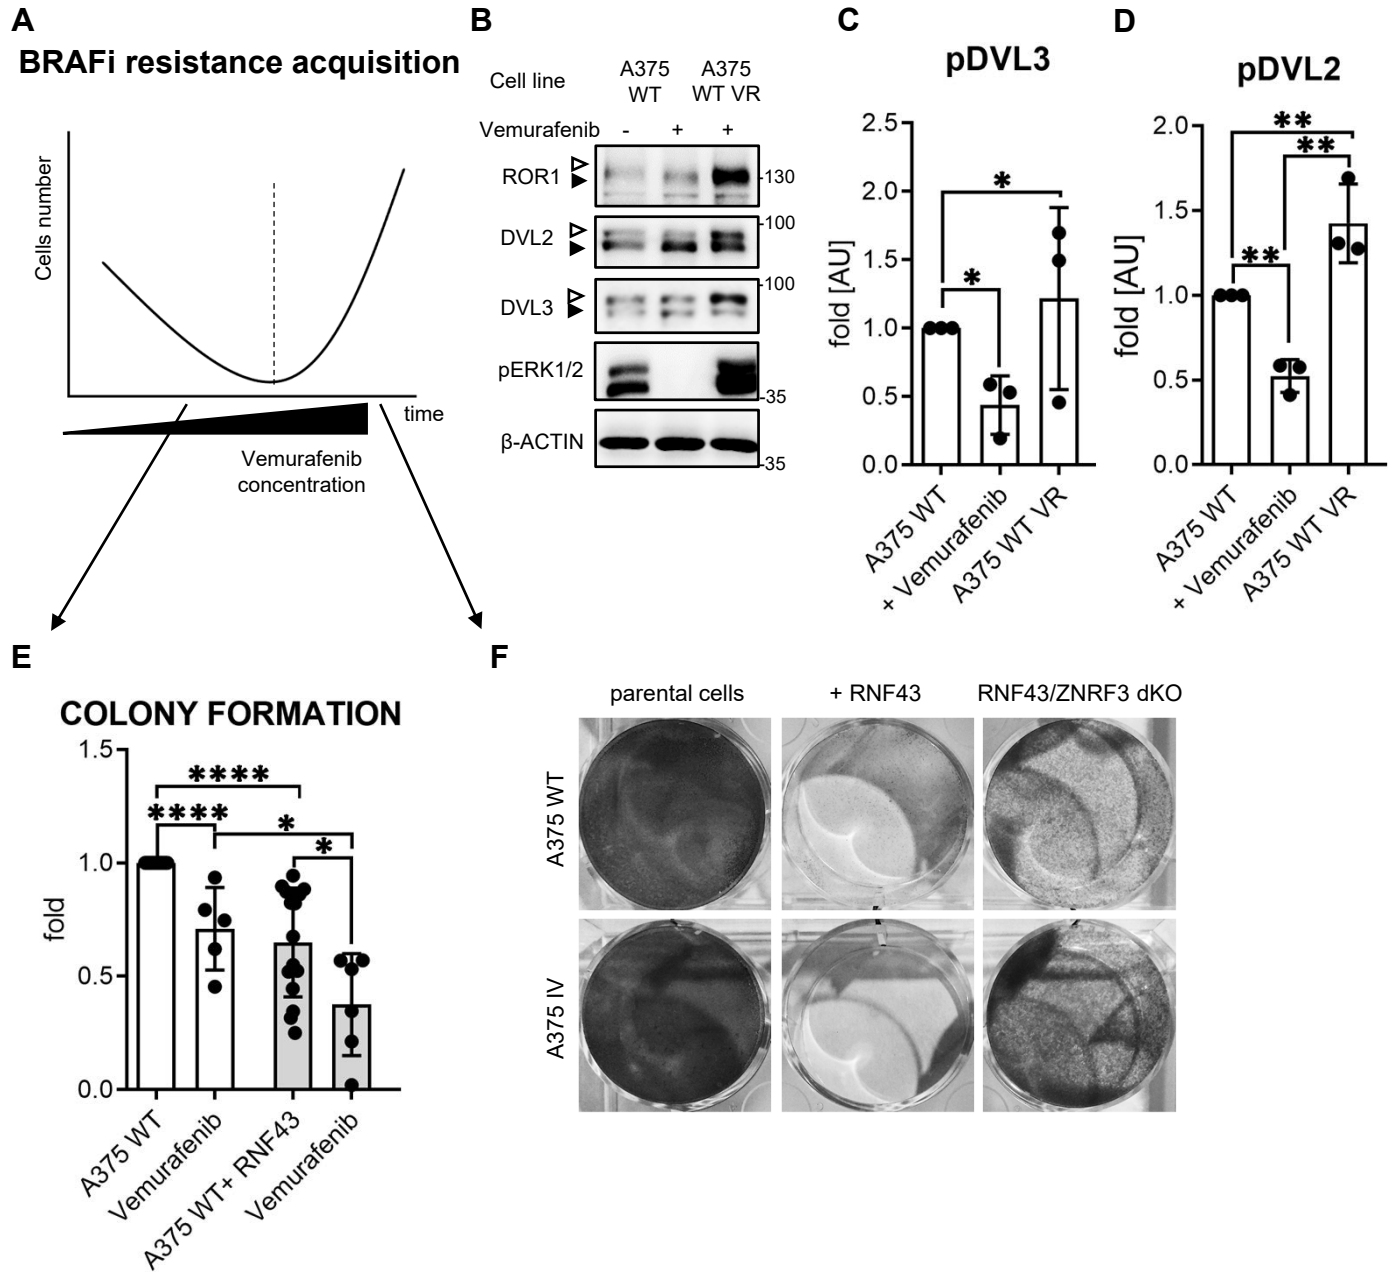

Source: https://www.biorxiv.org/content/10.1101/2021.02.08.430210v1.full.pdf
